# Supplementary material for: Dysregulation of Amino Acid Transporters in a Rat Model of TLR7-Mediated Maternal Immune Activation
Source: MDPI journal article supplement (doi:10.3390/pharmaceutics15071857), 2023-07-01
Supplement: s1 [file s1]

## Supplementary Data

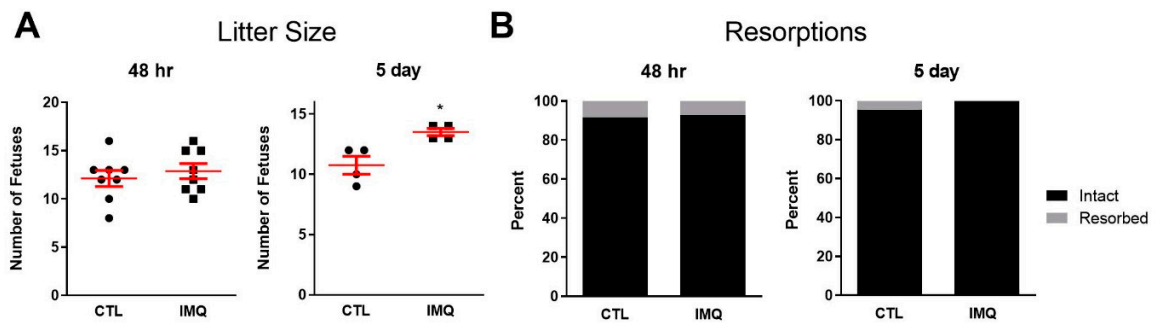

**Figure S1: (A) Litter size and (B) percent of resorptions observed 48 hr or 5 days after IMQ.** Significance was assessed using Student's unpaired t-test. \*  $p < 0.05$ .  $n = 4$  (6 hr) or 8 (5 day) litters per group.

**Table S1: Primers used for qPCR.** Sequences are reported 5' to 3'.

| Gene                           | Protein                   | Forward                      | Reverse                    |
|--------------------------------|---------------------------|------------------------------|----------------------------|
| <i>Rat</i>                     |                           |                              |                            |
| <i>Gapdh</i>                   | GAPDH                     | GCTCTCTGCTCCTCCCTGTT         | GAGGCTGGCACTGCACAA         |
| <i>Il-6</i>                    | IL-6                      | GATGGATGCTTCCAAACTGGATAT     | TCCAGAAGACCAGAGCAGATTTT    |
| <i>Tnf-<math>\alpha</math></i> | TNF- $\alpha$             | GGTCCCAACAAGGAGGAGAAGT       | TGGGCCATGGAAGTATGA         |
| <i>Il-1<math>\beta</math></i>  | IL-1 $\beta$              | CGTGCTGTCTGACCCATGTG         | ACTTGTTGGCCTTATGTTCTGTCCAT |
| <i>Slc7a5</i>                  | LAT1                      | CCATGATCCACCCACAGCTT         | GCGTACATCAGGGTCATGACA      |
| <i>Slc7a8</i>                  | LAT2                      | GGCCCTGGCTCTGATCATC          | TCCAGCCAAAAGAATTCTCCTT     |
| <i>Slc3a2</i>                  | 4F2hc                     | ATGACAGTGAAGGGCCAAAATG       | GTCACCTCAGTCGCCCGGAAGT     |
| <i>Slc1a4</i>                  | ASCT1                     | ACGGCTTTTGCGACCTGTT          | GTCCACGCCATTGTTTTCTT       |
| <i>Slc1a5</i>                  | ASCT2                     | TTCCCTCCAATCTGGTGTCT         | GACAGGCACCACATGGAATG       |
| <i>Slc38a1</i>                 | SNAT1                     | CGAGTGTTGGTGGTGATGGTAA       | ACCCAGGTTCTTCAAGAGACA      |
| <i>Slc38a2</i>                 | SNAT2                     | CTATCTGGTCCTTCTGGTGTCTT      | GTATCCTAGATTCTCAGCAGTGACAA |
| <i>Slc38a3</i>                 | SNAT3                     | GCGGTTGCCCTGTTGTCTAG         | CCCACAATCCCAGAAGACTTG      |
| <i>Slc38a4</i>                 | SNAT4                     | GCTTCTTACTGTGGCAATTCTATCG    | CTCCTTCCTTGGCTGTCTTCA      |
| <i>Slc38a5</i>                 | SNAT5                     | CTTCACAGTTGACTCACAGATGTCTTAC | GTGCCAGGCCCATAGC           |
| <i>Slc7a1</i>                  | CAT1                      | CCGGTTCGCACTGTGGAT           | GTGCCAGGCCCATAGC           |
| <i>Slc7a2</i>                  | CAT2B                     | TGCCGTGTGCCTTGTATTACTT       | CCAAGCAGACTCCTTTACTCCAA    |
| <i>Slc7a3</i>                  | CAT3                      | TCGGGACTCTGCTCGCTTAC         | GTCAGGCTGATATCTGAGGATAAGAA |
| <i>Slc1a3</i>                  | EAAT1                     | GCGGATGCTGCAGATGTTG          | CGCCATTCTGTGACAAGACT       |
| <i>Slc1a2</i>                  | EAAT2                     | GACTGGCTGCTGGATAGAATGA       | ATCCCAGCCCCAAAAGAATC       |
| <i>Slc1a1</i>                  | EAAT3                     | GAGAAATTCTGATGCGGATGCT       | GACACCTGTGATCATGCTGGAT     |
| <i>Slc6a6</i>                  | TAUT                      | GCATCACCTGCTGGGAGAAG         | GATGGACGCGTAGCCAATG        |
| <i>Slc6a9</i>                  | GLYT1                     | AAAGGCGTGGGCTATGGTATG        | TGCAGATGACCACGTTGTAGTAG    |
| <i>Sry</i>                     | SRY                       | CCTCCAAGAACCAGAAAAGCAT       | TGTTTCTGCTGTAGTGGGTATCCA   |
| <i>Human</i>                   |                           |                              |                            |
| <i>YWHAZ</i>                   | 14-3-3 protein zeta/delta | AGATAAAAAGAACATCCAGTCATGGA   | GCCTGCTCGGCCAGTTT          |
| <i>TOP1</i>                    | TOP1                      | GATGAACCTGAAGATGATGGC        | TCAGCATCATCCTCATCTGC       |
| <i>SLC7A5</i>                  | LAT1                      | TTCACATCCTCCAGGCTCTTCT       | GAGGAGCTGTGGGTGGATCAT      |
| <i>SLC38A2</i>                 | SNAT2                     | CAACAGCGACTTCAACTAC          | GTAGTACCTGGATGAAATTCTG     |

**Table S2: Antibodies used for western blotting or Simple Western (WES). R = rat, H = human**

| Target                             | Company                                                       | Catalogue Number        | Dilution                                  |
|------------------------------------|---------------------------------------------------------------|-------------------------|-------------------------------------------|
| AMPK $\alpha$                      | Cell Signaling Technologies                                   | 2603                    | R: 1:50 (WES)<br>R: 1:1000 (Western)      |
| phos-AMPK $\alpha$<br>(Thr172)     | Cell Signaling Technologies                                   | 2535                    | R: 1:50 (WES)<br>R: 1:1000 (Western)      |
| p70S6k                             | Cell Signaling Technologies                                   | 9202                    | R: 1:25 (WES)<br>R: 1:1000 (Western)      |
| phos-p70S6k<br>(Thr389)            | Cell Signaling Technologies                                   | 9205                    | R: 1:500 (Western)                        |
| STAT3                              | Cell Signaling Technologies                                   | 4904S                   | R: 1:100 (WES)<br>R: 1:1000 (Western)     |
| phos-STAT3<br>(Tyr705)             | Cell Signaling Technologies                                   | 9145                    | R: 1:2000 (Western)                       |
| p65 NF $\kappa$ B                  | Cell Signaling Technologies                                   | 4764S                   | R: 1:100 (WES)<br>R: 1:1000 (Western)     |
| phos-p65 NF $\kappa$ B<br>(Ser536) | Cell Signaling Technologies                                   | 3033S                   | R: 1:1000 (Western)                       |
| ASCT1                              | H: Cell Signaling<br>Technologies<br>R: Aviva Systems Biology | H: 8442<br>R: OAAN01042 | H: 1:1000 (Western)<br>R: 1:300 (Western) |
| SNAT2                              | Santa Cruz Biotechnologies                                    | sc-166366               | H: 1:500 (Western)<br>R: 1:200 (Western)  |
| TAUT                               | Sigma Aldrich                                                 | AB5414P                 | H: 1:500 (Western)<br>R: 1:500 (Western)  |
| EAAT2                              | Santa Cruz Biotechnologies                                    | sc-365634               | H: 1:2000 (WES)<br>R: 1:1000 (Western)    |
| 4F2hc                              | Aviva Systems Biology                                         | OAAN01460               | R: 1:500 (Western)                        |
| ASCT2                              | Cell Signaling Technologies                                   | 5345                    | R: 1:200 (Western)                        |
| CAT3                               | Invitrogen                                                    | PIPA569257              | R: 1:500 (Western)                        |
| EAAT1                              | Santa Cruz Biotechnologies                                    | sc-515839               | R: 1:500 (Western)                        |
| GLYT1                              | Aviva Systems Biology                                         | ARP42330                | R: 1:500 (Western)                        |
| LAT1                               | Cell Signaling Technologies                                   | 5347S                   | H: 1:20000 (Western)                      |

**Table S3: Amino acids quantified by HPLC and separated by sex.** Amino acid levels in male and female fetal brains were quantified by HPLC 48 hr after IMQ administration. The ratios of fetal brain:maternal serum concentrations are expressed as mean  $\pm$  SEM. Significance was determined within each sex using Student's unpaired t-tests with  $p < 0.05$  set as significant (no significant changes were observed).  $n = 3-4$  fetal brains per sex per group.

| Amino Acid                  | Males            |                | Females         |                |
|-----------------------------|------------------|----------------|-----------------|----------------|
|                             | CTL              | IMQ            | CTL             | IMQ            |
| Aspartic Acid               | 122.1 $\pm$ 13.8 | 91.4 $\pm$ 5.6 | 114.7 $\pm$ 9.2 | 84.8 $\pm$ 6.4 |
| Glutamic Acid               | 110.9 $\pm$ 12.9 | 78.0 $\pm$ 7.0 | 101.9 $\pm$ 6.7 | 75.5 $\pm$ 3.0 |
| Serine                      | 14.5 $\pm$ 1.7   | 13.7 $\pm$ 0.9 | 13.3 $\pm$ 1.8  | 12.3 $\pm$ 0.5 |
| Asparagine                  | 15.4 $\pm$ 1.2   | 14.1 $\pm$ 1.2 | 13.7 $\pm$ 1.9  | 12.7 $\pm$ 0.9 |
| Glycine                     | 32.0 $\pm$ 3.5   | 27.3 $\pm$ 4.4 | 28.9 $\pm$ 1.8  | 26.7 $\pm$ 4.2 |
| Glutamine                   | 6.1 $\pm$ 0.30   | 5.3 $\pm$ 0.2  | 5.7 $\pm$ 0.55  | 5.0 $\pm$ 0.1  |
| $\beta$ -alanine            | 13.5 $\pm$ 1.0   | 7.6 $\pm$ 0.4  | 11 $\pm$ 1.5    | 7.4 $\pm$ 0.9  |
| Taurine                     | 63.1 $\pm$ 11.4  | 58.2 $\pm$ 4.3 | 56.0 $\pm$ 5.5  | 52.6 $\pm$ 3.6 |
| Histidine                   | 12.9 $\pm$ 0.7   | 11.4 $\pm$ 0.7 | 11.8 $\pm$ 1.1  | 10.9 $\pm$ 0.5 |
| Arginine                    | 21.2 $\pm$ 5.9   | 37.3 $\pm$ 1.8 | 25.4 $\pm$ 7.1  | 33.0 $\pm$ 0.6 |
| Citrulline                  | 1.4 $\pm$ 0.1    | 1.5 $\pm$ 0.2  | 1.4 $\pm$ 0.1   | 1.5 $\pm$ 0.2  |
| Threonine                   | 5.8 $\pm$ 0.7    | 5.5 $\pm$ 0.01 | 5.6 $\pm$ 0.9   | 5.0 $\pm$ 0.3  |
| Alanine                     | 9.0 $\pm$ 0.8    | 8.6 $\pm$ 0.2  | 8.8 $\pm$ 1.1   | 8.0 $\pm$ 0.03 |
| Proline                     | 7.5 $\pm$ 0.7    | 6.6 $\pm$ 0.5  | 7.0 $\pm$ 1.0   | 6.5 $\pm$ 0.6  |
| Creatinine                  | 12.6 $\pm$ 1.2   | 12.0 $\pm$ 0.7 | 11.4 $\pm$ 1.1  | 10.7 $\pm$ 0.8 |
| $\alpha$ -Aminobutyric Acid | 2.7 $\pm$ 0.3    | 2.2 $\pm$ 0.2  | 2.3 $\pm$ 0.3   | 2.1 $\pm$ 0.1  |
| Tyrosine                    | 12.1 $\pm$ 0.9   | 12.9 $\pm$ 0.6 | 10.4 $\pm$ 0.7  | 12.2 $\pm$ 0.4 |
| Valine                      | 7.2 $\pm$ 0.3    | 6.9 $\pm$ 0.8  | 6.5 $\pm$ 0.6   | 6.7 $\pm$ 0.6  |
| Methionine                  | 8.5 $\pm$ 1.0    | 9.2 $\pm$ 0.7  | 7.4 $\pm$ 0.8   | 8.7 $\pm$ 0.6  |
| Isoleucine                  | 6.3 $\pm$ 0.4    | 6.5 $\pm$ 0.5  | 5.5 $\pm$ 0.7   | 6.1 $\pm$ 0.4  |
| Leucine                     | 8.6 $\pm$ 0.4    | 7.6 $\pm$ 0.5  | 7.5 $\pm$ 0.7   | 7.3 $\pm$ 0.4  |
| Phenylalanine               | 9.0 $\pm$ 0.5    | 8.4 $\pm$ 0.5  | 8.1 $\pm$ 0.8   | 8.0 $\pm$ 0.3  |
| Tryptophan                  | 1.2 $\pm$ 0.1    | 1.6 $\pm$ 0.05 | 1.0 $\pm$ 0.2   | 1.5 $\pm$ 0.1  |
| Ornithine                   | 12.7 $\pm$ 1.0   | 8.2 $\pm$ 1.2  | 11.1 $\pm$ 1.5  | 8.4 $\pm$ 1.1  |
| Lysine                      | 3.1 $\pm$ 0.8    | 4.3 $\pm$ 0.02 | 3.3 $\pm$ 0.6   | 4.2 $\pm$ 0.1  |

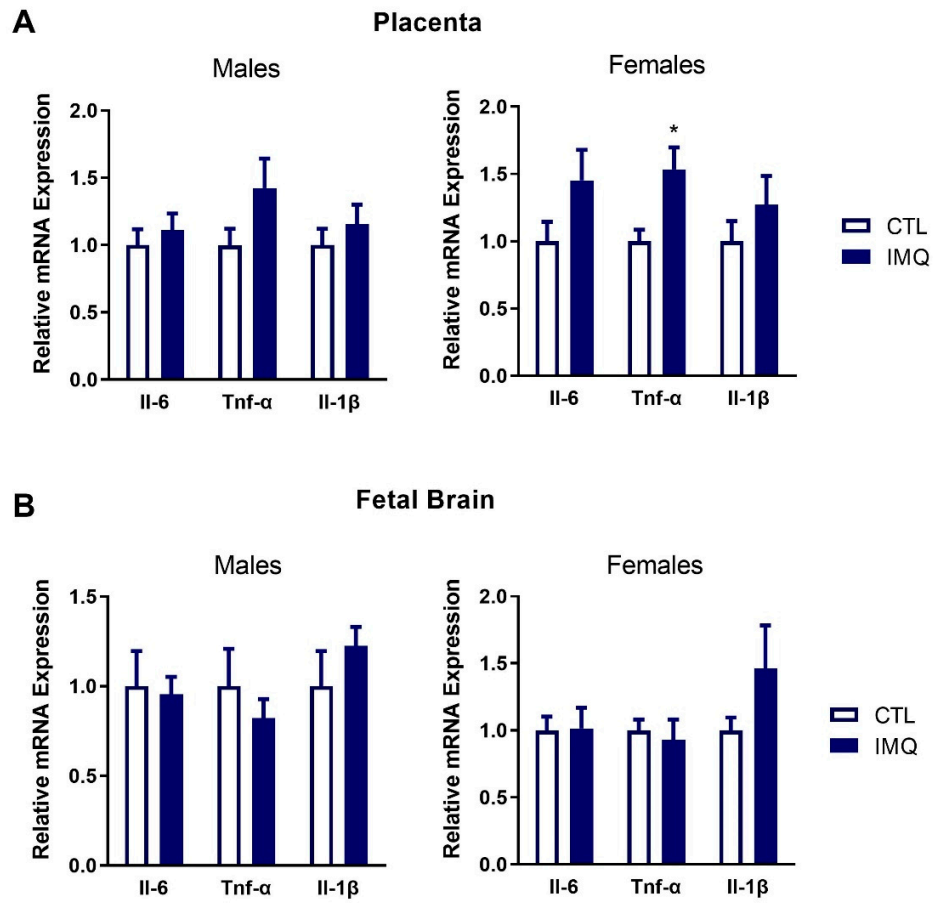

**Figure S2: mRNA expression of cytokines in (A) the placenta and (B) fetal brain 48 hrs after IMQ.** Transcript levels of cytokines were measured by qPCR. Expression is presented as the average  $\pm$  SEM relative to controls. Significance was determined using a Student's unpaired t-test. \*  $p < 0.05$ .  $n = 8$  per group.

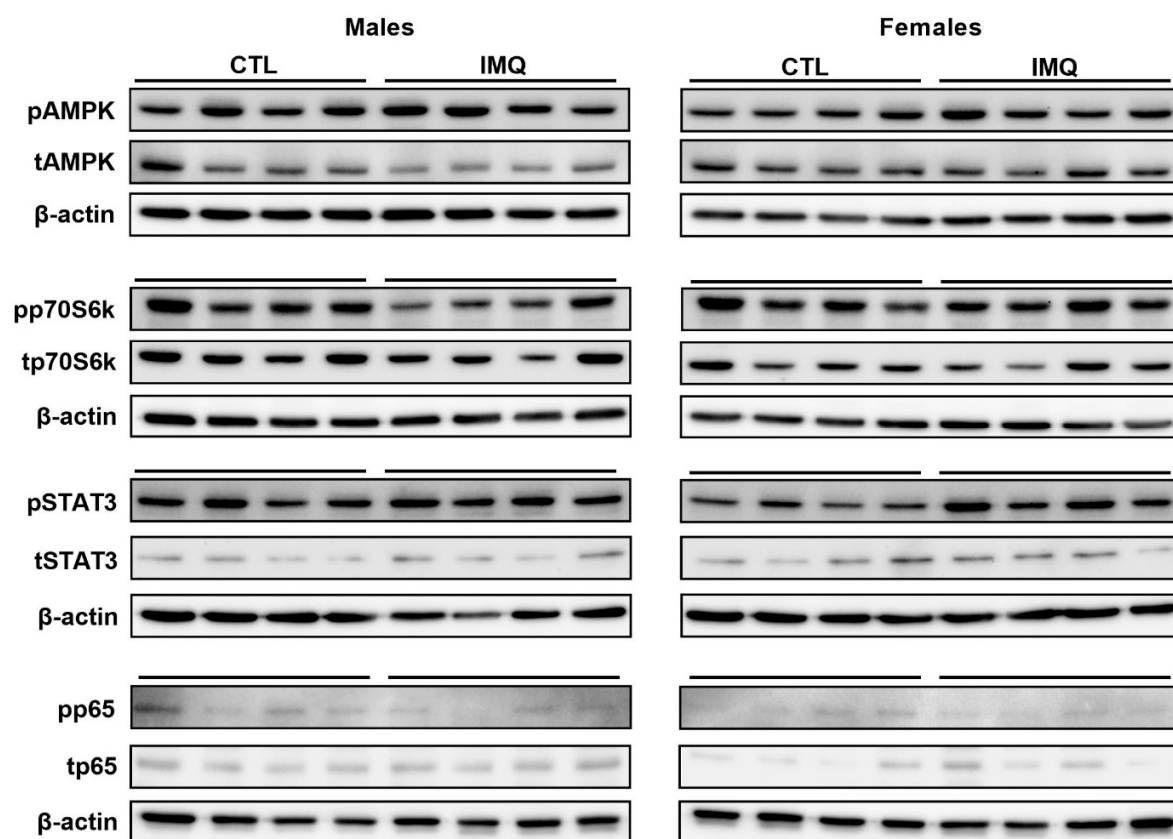

**Figure S3: Representative blots showing the effect of IMQ on signaling pathways in rat placentas.** Phosphorylated (p) or total (t) protein expression in male and female rat placentas was measured 6 hours after IMQ or sterile water using western blotting or Simple WES and normalized to  $\beta$ -actin.

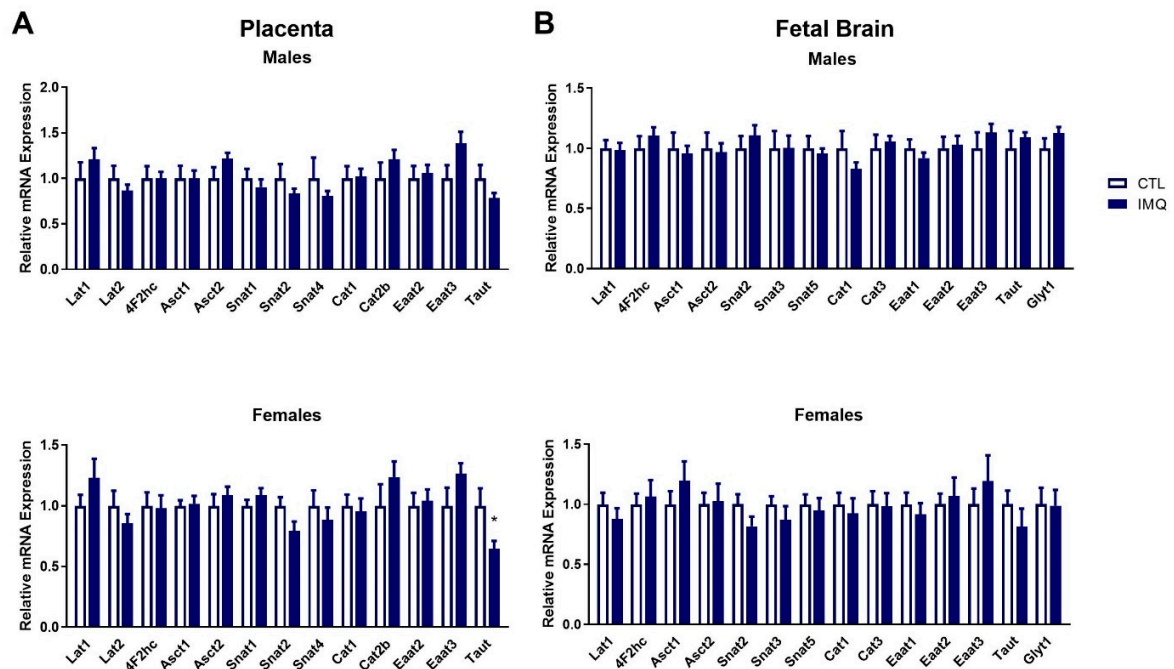

**Figure S4: mRNA levels of amino acid transporters in (A) the placenta and (B) fetal brain 48 hrs post-IMQ.** Expression was determined using qPCR and is presented as average expression  $\pm$  SEM relative to controls. Significance was determined using Student's unpaired t-test. \*  $p < 0.05$ .  $n = 8$  placentas per group.

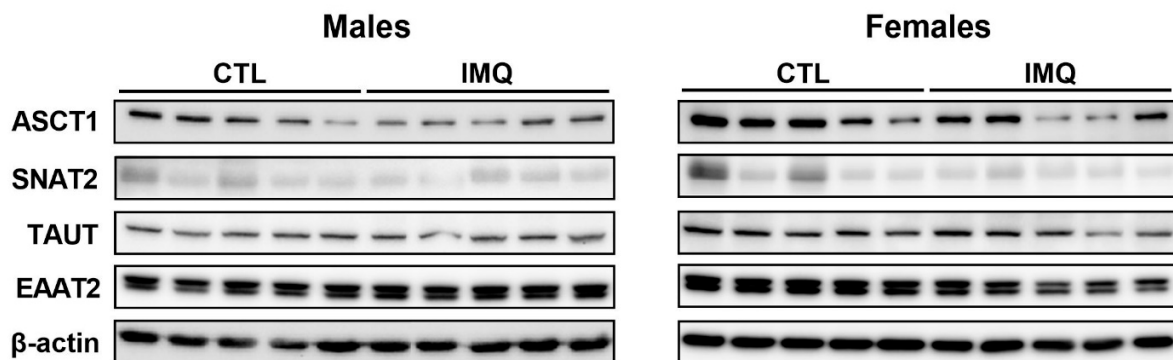

**Figure S5: Representative blots showing the effect of IMQ on transporter expression in rat placentas.** Protein expression of amino acid transporters in male and female rat placentas was measured 48 hours after IMQ or sterile water using western blotting or Simple WES and normalized to  $\beta$ -actin.

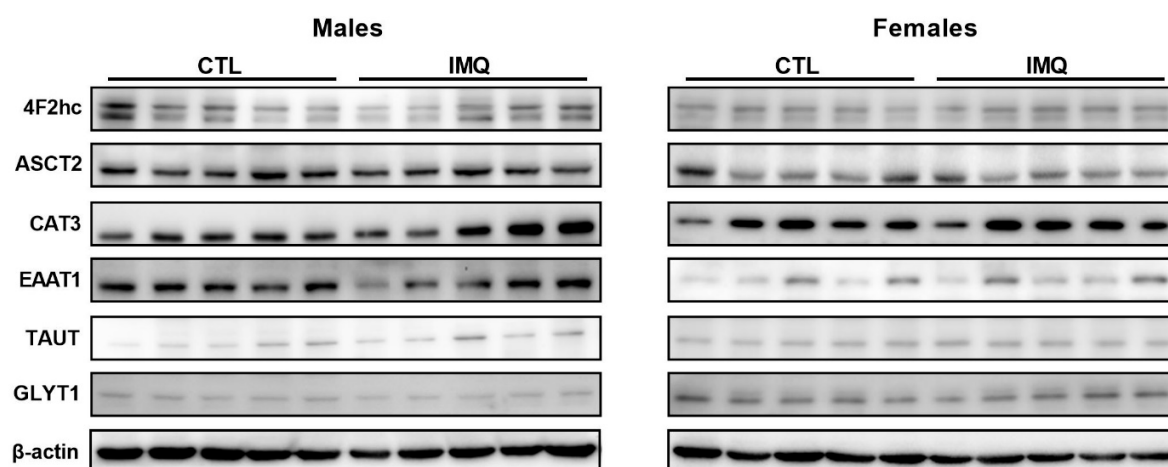

**Figure S6: Representative blots showing the effect of IMQ on transporter expression in fetal rat brain.** Protein expression of amino acid transporters in male and female fetal rat brains was measured 48 hours after IMQ or sterile water using western blotting or Simple WES and normalized to  $\beta$ -actin.

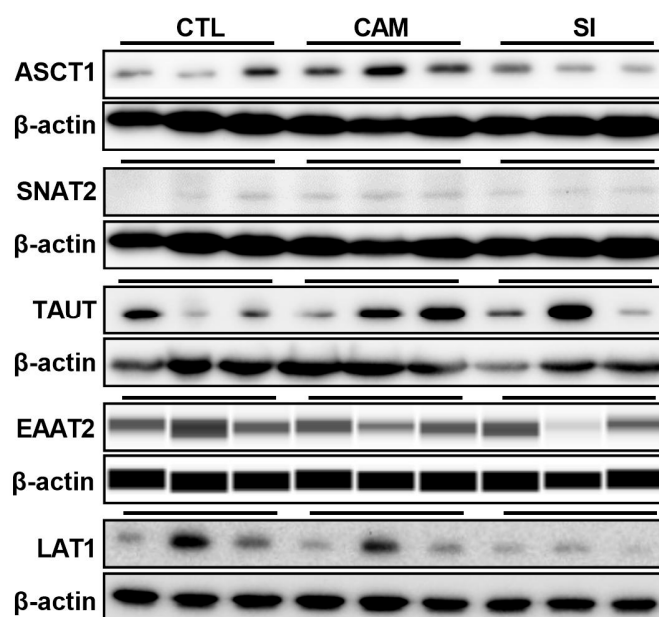

**Figure S7: Representative blots showing amino acid transporter expression in human placentas at term.** Protein expression of amino acid transporters was measured in human placentas complicated by chorioamnionitis (CAM) or suspected infection (SI) and compared to controls (CTL) using western blotting or Simple WES and normalized to  $\beta$ -actin.



**Table S4: Summary and comparison of changes in placental transporter expression in rats and humans.** ↓ indicates decreased expression whereas ↔ indicates no change in expression. M and F mean changes were observed in males or females, respectively. SI means that changes were observed in the suspected infection group. Unless other wise indicated by the addition of “trend”, altered expression was statistically significant ( $p < 0.05$ ).

| Transporter | Rat            |                       | Human                  |
|-------------|----------------|-----------------------|------------------------|
| Placenta    | mRNA           | Protein               | Protein                |
| LAT1        | ↓ (M&F)        | N/A                   | ↔                      |
| ASCT1       | ↓ ( <b>M</b> ) | ↓ ( <b>M, trend</b> ) | ↓ ( <b>SI</b> )        |
| TAUT        | ↓ (M)          | ↔                     | ↔                      |
| EAAT2       | ↔              | ↓ (F)                 | ↔                      |
| SNAT2       | ↔              | ↓ ( <b>M, trend</b> ) | ↓ ( <b>SI, trend</b> ) |
