# Supplementary material for: Dysregulation of Amino Acid Transporters in a Rat Model of TLR7-Mediated Maternal Immune Activation
Source: Pharmaceutics. 2023 Jul 1;15(7):1857. doi: 10.3390/pharmaceutics15071857 (PMC10385561; doi:10.3390/pharmaceutics15071857)
Supplement: Supplementary file 1 [file pharmaceutics-15-01857-s001.zip › DESeq Output Supplmentary File.xlsx]

## Sheet: DESeq Output file
Gene ID	Base mean	log2(FC)	StdErr	Wald-Stats	P-value	P-adj
Akr1b1	1559.72	0.361861	0.0672435	5.38135	7.39286e-08	0.00111152
RGD1305807	78.2149	-0.39765	0.082291	-4.83224	1.35004e-06	0.0101489
Ccdc129	172.409	0.31383	0.0739425	4.24425	2.19324e-05	0.109918
Rab11fip1	132.489	-0.338908	0.0818368	-4.14127	3.45386e-05	0.129822
Dok6	312.6	0.303923	0.0748544	4.06019	4.90328e-05	0.147442
Stk11	2552.03	-0.200457	0.0506151	-3.96041	7.48211e-05	0.187489
Dhx34	474.556	-0.276394	0.0706928	-3.90979	9.23763e-05	0.198411
Ttc25	49.8944	-0.296834	0.0814618	-3.64384	0.000268602	0.410655
Gpr81	12.677	0.243978	0.0670146	3.64067	0.00027193	0.410655
Fam107b	2502.27	0.186147	0.0511458	3.63953	0.000273133	0.410655
Gpm6a	15580.2	0.225753	0.0629805	3.5845	0.000337725	0.423142
Nol3	311.563	0.282074	0.0784213	3.59691	0.000322019	0.423142
Zfp503	738.425	-0.238513	0.0683358	-3.49031	0.000482455	0.557978
LOC310926	39.6851	-0.19862	0.0597611	-3.32356	0.000888758	0.632755
Ercc2	781.131	-0.171295	0.0541141	-3.16543	0.00154853	0.632755
Slc7a10	265.249	-0.220926	0.0666587	-3.31428	0.000918794	0.632755
Uros	163.779	0.262081	0.0824957	3.17691	0.00148856	0.632755
Aip	1082.27	0.168339	0.0533727	3.15403	0.00161035	0.632755
Col17a1	12.9487	-0.194405	0.0628019	-3.09553	0.00196464	0.632755
Kif1c	1269.77	-0.157714	0.0467896	-3.37071	0.00074975	0.632755
Vmp1	1514.59	0.210018	0.0682981	3.07502	0.00210491	0.632755
Cuedc1	1269.68	-0.147534	0.0481413	-3.06461	0.00217954	0.632755
Igf2bp2	1113.89	-0.223987	0.0726262	-3.0841	0.00204169	0.632755
Ephb3	417.238	-0.209214	0.0663851	-3.15152	0.00162425	0.632755
Polm	174.098	-0.222955	0.0722137	-3.08743	0.00201894	0.632755
Mapk8	7195.89	0.152862	0.0481107	3.1773	0.00148656	0.632755
RGD1309676	457.618	0.214386	0.0696914	3.07623	0.00209639	0.632755
S1pr3	395	-0.222086	0.0693508	-3.20236	0.00136307	0.632755
Pcdhga2	313.495	-0.273659	0.0807809	-3.38767	0.000704882	0.632755
Dnaaf1	31.7403	-0.258373	0.0771568	-3.34867	0.000812003	0.632755
Zfpm1	392.115	-0.204537	0.0667236	-3.06544	0.00217351	0.632755
Rad1	580.74	0.235215	0.0754551	3.11729	0.00182524	0.632755
Car1	17.6153	-0.187708	0.0605494	-3.10008	0.00193469	0.632755
Car13	29.136	0.245321	0.0766869	3.199	0.00137906	0.632755
Fdps	4927.41	0.186297	0.058664	3.17567	0.00149491	0.632755
Slc9b1	6.91307	-0.159765	0.0468671	-3.40889	0.000652288	0.632755
Serinc1	10305.6	0.179235	0.0583489	3.07179	0.00212781	0.632755
Psmf1	727.486	-0.163267	0.0518622	-3.14809	0.00164342	0.632755
Cdk5rap1	349.509	0.192932	0.0621991	3.10184	0.0019232	0.632755
Tox2	497.746	-0.236242	0.0715567	-3.30146	0.000961825	0.632755
Hgf	55.3404	0.270923	0.082464	3.28534	0.00101858	0.632755
Arl8b	3506.68	0.142012	0.0453896	3.12874	0.00175559	0.632755
Bid	489.008	0.257508	0.0753513	3.41743	0.000632147	0.632755
Rab2a	3418.54	0.181784	0.0593407	3.06339	0.00218844	0.632755
Epb41l4b	18.6131	-0.24292	0.0739672	-3.28416	0.00102288	0.632755
Smpdl3b	38.5477	0.251272	0.0817552	3.07347	0.00211586	0.632755
Id2	3684.41	0.211732	0.066702	3.1743	0.00150199	0.632755
Sec23a	2235.48	0.130527	0.0420459	3.10439	0.00190669	0.632755
Misp	14.0991	-0.178509	0.0572663	-3.11717	0.00182598	0.632755
Mier2	1325.24	-0.140229	0.0442272	-3.17064	0.00152102	0.632755
Phlda1	950.5	-0.165261	0.0538918	-3.06653	0.00216558	0.632755
Gnat1	21.9649	-0.246269	0.0742704	-3.31585	0.000913663	0.632755
Utp18	784.526	0.195805	0.0642174	3.04909	0.00229532	0.651135
Cd79b	8.3373	-0.178791	0.059406	-3.00965	0.00261552	0.71156
Plcd1	299.38	-0.22864	0.0760706	-3.00563	0.00265031	0.71156
Abcc10	508.343	-0.22975	0.0761637	-3.01653	0.00255682	0.71156
Wnt7a	1352.46	-0.142044	0.0473688	-2.99869	0.00271146	0.715206
Ebf1	655.264	-0.211451	0.0728353	-2.90315	0.00369435	0.740712
Zfp354c	1316.28	0.160034	0.0544959	2.93663	0.00331797	0.740712
Zfp238	10438.9	0.156531	0.0529408	2.95672	0.00310926	0.740712
Ugp2	1872.77	0.202445	0.0687978	2.9426	0.00325464	0.740712
Tsc22d1	19708.7	0.171764	0.0584669	2.93779	0.00330559	0.740712
Casp3	4007.54	0.148697	0.0509918	2.9161	0.00354433	0.740712
Ror2	266.891	-0.211462	0.0731908	-2.88919	0.00386231	0.740712
Ttc39c	349.315	-0.175821	0.0600919	-2.92586	0.00343503	0.740712
Rnmt	1729.49	0.15676	0.0531815	2.94764	0.00320214	0.740712
Trim23	1450.45	0.182827	0.0620959	2.94427	0.00323718	0.740712
Snx16	729.438	0.216293	0.0725515	2.98123	0.00287094	0.740712
Vps45	1304.45	0.180267	0.0624456	2.88678	0.003892	0.740712
Wdr63	65.3064	-0.239365	0.0811921	-2.94812	0.00319709	0.740712
Zfp523	1261.08	-0.160925	0.055538	-2.89757	0.00376066	0.740712
Scg5	1024.67	0.220291	0.0762327	2.88972	0.00385588	0.740712
Pusl1	209.211	0.211215	0.0714685	2.95536	0.00312301	0.740712
Smoc1	180.849	-0.228598	0.0790841	-2.89057	0.00384544	0.740712
Socs2	119.918	-0.225847	0.0781228	-2.89093	0.00384109	0.740712
Sla	2738.01	0.225669	0.0778312	2.89946	0.00373802	0.740712
L3mbtl2	1193.65	-0.140155	0.0484194	-2.8946	0.0037964	0.740712
Pcbp4	9409.59	-0.118392	0.0406479	-2.91262	0.00358415	0.740712
Ctdspl	427.805	-0.195746	0.065816	-2.97413	0.00293816	0.740712
Hebp1	89.2866	0.237367	0.0824242	2.87982	0.00397903	0.747809
Papss2	29.7421	-0.172438	0.0600448	-2.87181	0.00408123	0.755533
Pmepa1	763.122	-0.170396	0.0593969	-2.86878	0.00412063	0.755533
Nrip3	1107.77	-0.18687	0.065423	-2.85634	0.00428561	0.756769
MGC93861	5.1311	-0.118119	0.0422064	-2.7986	0.00513249	0.756769
Stx8	450.22	0.215175	0.0767668	2.80296	0.00506353	0.756769
B3galt2	1085.02	0.182207	0.063954	2.84904	0.00438517	0.756769
RGD1309104	652.739	-0.147991	0.052501	-2.81881	0.00482013	0.756769
Nxnl1	13.0814	-0.178189	0.0639144	-2.78793	0.00530458	0.756769
Mpv17l2	412.51	0.210901	0.0752357	2.8032	0.00505978	0.756769
Hmgb1	421.553	0.188763	0.0668436	2.82395	0.00474363	0.756769
Idi1	1896.96	0.19196	0.0671566	2.85839	0.00425799	0.756769
Zfp474	5.33862	-0.139459	0.0505801	-2.75719	0.00583013	0.756769
Vps35	5113.68	0.185409	0.0671513	2.76107	0.00576128	0.756769
Wwp2	744.439	-0.169104	0.0605793	-2.79145	0.00524724	0.756769
Oxct1	4386.46	0.153769	0.0555619	2.76752	0.0056484	0.756769
Impa1	1680.46	0.179363	0.0649711	2.76066	0.00576842	0.756769
Zc2hc1a	1613.94	0.164663	0.0579023	2.84381	0.0044578	0.756769
RGD1564379	648.565	-0.142665	0.0517189	-2.75847	0.00580729	0.756769
Gyltl1b	71.3644	-0.232757	0.0824644	-2.82251	0.00476486	0.756769
Smox	515.143	-0.148812	0.0528332	-2.81663	0.00485297	0.756769
Lancl2	2430.07	0.152774	0.0538023	2.83953	0.00451797	0.756769
Pdp1	2127.7	0.19304	0.0683858	2.82281	0.00476049	0.756769
Med18	589.341	0.199618	0.0718788	2.77715	0.00548374	0.756769
Zdhhc18	882.513	-0.162263	0.0581862	-2.78868	0.0052924	0.756769
Scfd1	915.044	0.158071	0.0556936	2.83822	0.00453661	0.756769
Rdh11	829.635	0.162504	0.0586715	2.76972	0.00561039	0.756769
Traf3	943.448	-0.190246	0.0682293	-2.78833	0.00529814	0.756769
Plk5	250.89	-0.212459	0.0760619	-2.79324	0.00521831	0.756769
Reep6	197.889	-0.18587	0.0670982	-2.77011	0.00560366	0.756769
Rpl30	6381.57	0.227241	0.082432	2.7567	0.00583872	0.756769
Azin1	4338.92	0.143326	0.0517532	2.76942	0.00561563	0.756769
Acat1	2771.57	0.184512	0.0655342	2.81551	0.00487001	0.756769
RGD1305464	186.134	-0.208194	0.0751809	-2.76923	0.00561883	0.756769
Rasgrf1	544.591	-0.211013	0.0756404	-2.78969	0.0052759	0.756769
Efhb	36.2139	-0.214525	0.075119	-2.85581	0.00429278	0.756769
Il1rapl1	41.3542	0.228863	0.0822961	2.78097	0.00541971	0.756769
Kdelr1	2220.02	-0.114647	0.0421292	-2.72132	0.00650221	0.758551
RGD1304587	586.731	0.137718	0.0504101	2.73196	0.00629594	0.758551
Abca8a	291.781	0.214831	0.0785727	2.73417	0.00625385	0.758551
Snapc2	692.987	-0.160604	0.0585321	-2.74387	0.00607194	0.758551
Hpgd	68.0777	0.224698	0.0820016	2.74017	0.00614077	0.758551
Acbd5	779.356	0.142075	0.0522873	2.7172	0.0065837	0.758551
Slc25a46	1806.05	0.163478	0.0601365	2.71845	0.00655886	0.758551
Amacr	329.724	0.185075	0.0681859	2.71427	0.00664227	0.758551
Wars2	198.797	0.214357	0.0790135	2.71292	0.00666935	0.758551
Nrm	342.702	-0.179413	0.0659751	-2.71941	0.00653988	0.758551
Nostrin	63.4602	0.223183	0.0824036	2.70841	0.00676061	0.758551
RGD1564664	1102.96	-0.180705	0.0661377	-2.73226	0.00629024	0.758551
Lypla2	2200.02	-0.139607	0.0509144	-2.742	0.00610663	0.758551
Bzw2	7901.99	0.179802	0.0657208	2.73585	0.006222	0.758551
Mgat4c	124.635	0.214912	0.0787261	2.72988	0.00633583	0.758551
Kbtbd3	283.728	0.207059	0.0760611	2.72227	0.00648344	0.758551
Tex12	2.62418	0.0886484	0.0327161	2.70963	0.00673588	0.758551
Scamp2	623.181	-0.160847	0.0587162	-2.7394	0.00615515	0.758551
Cept1	593.498	0.176466	0.0655956	2.69022	0.00714055	0.795245
Spem1	119.116	-0.204667	0.076269	-2.6835	0.0072857	0.799565
Sult1c3	6.4084	-0.0748926	0.0279033	-2.68401	0.00727453	0.799565
Pcmt1	2351.66	0.189473	0.070942	2.67082	0.00756663	0.813048
Gpr85	4611.01	0.193134	0.0723178	2.67064	0.00757078	0.813048
Neurod6	12491.1	0.185282	0.0692765	2.67453	0.00748342	0.813048
Lin7c	1171.19	0.14223	0.0533823	2.66436	0.0077134	0.822489
Kmo	6.49244	0.134598	0.0506256	2.6587	0.00784436	0.830563
Catsper2	86.3628	0.216677	0.0816966	2.65221	0.00799657	0.835077
Klhdc2	5270.11	0.175279	0.0661443	2.64994	0.00805053	0.835077
Grhl2	2.83808	-0.0887585	0.0334961	-2.64981	0.00805362	0.835077
Zfp496	1278.48	-0.148469	0.0565542	-2.62526	0.00865824	0.845023
Erbb2	226.187	-0.204733	0.0777122	-2.6345	0.00842606	0.845023
Nkiras2	1262.49	-0.122495	0.0469673	-2.60809	0.00910493	0.845023
Osgep	554.505	0.197608	0.0757349	2.6092	0.00907539	0.845023
Myh6	37.7959	-0.200264	0.0761714	-2.62912	0.00856059	0.845023
E2f4	1129.56	-0.133406	0.0510759	-2.61191	0.00900381	0.845023
Aprt	676.161	0.177286	0.0674323	2.62909	0.0085613	0.845023
Pcbp3	1211.01	-0.145022	0.0556049	-2.60809	0.009105	0.845023
Actc1	6.08409	0.0806539	0.0307407	2.62369	0.00869834	0.845023
Ndufaf1	333.119	0.205604	0.078544	2.6177	0.00885258	0.845023
Akr1b10	67.721	0.207945	0.0793445	2.62079	0.00877265	0.845023
Atp6v1h	2225.32	0.191019	0.0729747	2.61761	0.00885483	0.845023
Triqk	667.442	0.2102	0.0803597	2.61574	0.0089034	0.845023
Atp6v1c1	1755.8	0.164625	0.0628173	2.6207	0.00877507	0.845023
Gucy1a2	98.5268	0.21651	0.0824566	2.62575	0.00864592	0.845023
Snupn	471.192	0.174676	0.0667478	2.61696	0.00887174	0.845023
Rab9b	770.963	0.182998	0.0695213	2.63227	0.00848176	0.845023
Cnot8	2461.29	0.190793	0.0733567	2.60089	0.00929816	0.852426
Ogdhl	932.027	-0.143357	0.055106	-2.60148	0.00928227	0.852426
Nupl1	1131.58	0.135534	0.0521648	2.59819	0.00937169	0.85396
Lsm12	2551.09	-0.11266	0.0435025	-2.58974	0.00960475	0.869924
Them4	465.483	0.188872	0.0732202	2.5795	0.00989425	0.890779
Hbg1	206.976	-0.143423	0.0566753	-2.5306	0.0113867	0.902807
Btbd10	1690.39	0.169998	0.0660831	2.57249	0.0100971	0.902807
Maz	7381.25	-0.152051	0.0592576	-2.56593	0.01029	0.902807
Mapkapk2	1921.51	-0.13619	0.0540066	-2.52172	0.0116782	0.902807
Pcp4l1	77.2321	-0.204147	0.0808088	-2.5263	0.0115272	0.902807
Hus1	408.749	-0.144829	0.0570271	-2.53965	0.0110964	0.902807
Pxk	879.659	-0.119305	0.0469255	-2.54245	0.0110079	0.902807
Zfhx2	1128.2	-0.17594	0.0695821	-2.52853	0.0114542	0.902807
Mtmr6	2445.87	0.158348	0.0616384	2.56899	0.0101995	0.902807
Msx2	30.2376	-0.197041	0.077487	-2.54289	0.010994	0.902807
Sema4d	610.525	-0.161676	0.0630515	-2.56419	0.0103417	0.902807
Zfp521	1187.34	-0.175589	0.0694775	-2.52728	0.0114948	0.902807
B3galnt1	1539.82	0.192758	0.0758472	2.54141	0.0110407	0.902807
Gstm4	608.319	0.185123	0.0730305	2.53487	0.011249	0.902807
Dph5	421.725	0.180838	0.0706274	2.56046	0.0104535	0.902807
Rprm	4317.56	0.179809	0.0713302	2.52079	0.0117092	0.902807
Tfpi	348.003	0.204803	0.080832	2.53368	0.0112871	0.902807
Apip	204.14	0.204273	0.0798242	2.55903	0.0104964	0.902807
Sema3a	660.203	0.180006	0.0703923	2.55718	0.0105524	0.902807
Nfu1	627.44	0.168264	0.0663488	2.53606	0.0112109	0.902807
Fntb	830.269	-0.189645	0.0751047	-2.52508	0.0115671	0.902807
Arg2	597.696	0.13936	0.0546605	2.54955	0.0107862	0.902807
Hmga2	34.2687	-0.191917	0.0757191	-2.5346	0.0112577	0.902807
Fzd6	197.135	-0.194514	0.076616	-2.53882	0.0111227	0.902807
Arc	59.0325	-0.205991	0.0811304	-2.53901	0.0111165	0.902807
Igfbp6	22.5832	0.13671	0.0541754	2.52348	0.0116201	0.902807
Bzw1	6578.06	0.156688	0.0614788	2.54865	0.0108141	0.902807
Mrpl44	672.864	0.161626	0.063832	2.53205	0.0113398	0.902807
Nkd1	450.866	-0.196448	0.0779959	-2.51869	0.0117792	0.903571
Stx7	5438.6	0.143759	0.057186	2.51389	0.0119408	0.906717
Mtpn	3439.51	0.109187	0.043433	2.51391	0.0119401	0.906717
Ncam2	411.673	0.175844	0.0701719	2.5059	0.0122139	0.906955
Pskh1	177.738	-0.19972	0.0797288	-2.50499	0.0122455	0.906955
Ifi44	65.4193	0.183842	0.0733286	2.50711	0.0121724	0.906955
Wnt16	42.7096	0.184149	0.0734563	2.50692	0.0121788	0.906955
Tssc1	1079.52	0.183538	0.073253	2.50553	0.0122266	0.906955
Akap7	272.974	0.186176	0.0744399	2.50102	0.0123836	0.908232
Opa3	774.516	-0.138346	0.0552826	-2.50252	0.0123313	0.908232
Lgalsl	2449.28	0.159601	0.063906	2.49743	0.0125097	0.913023
Dpf2	2230.85	-0.136639	0.0548481	-2.49123	0.0127301	0.921292
Six3	365.374	-0.199055	0.0799159	-2.4908	0.0127455	0.921292
Acsf2	520.735	-0.154972	0.0622885	-2.48796	0.0128477	0.922552
Gdap2	654.876	0.161576	0.0649705	2.48691	0.0128857	0.922552
Pigk	819.237	0.173875	0.070032	2.48279	0.0130359	0.924504
Tuba1a	136288	0.127749	0.0514514	2.4829	0.0130318	0.924504
Prkaa2	568.907	0.169263	0.0682231	2.48103	0.0131005	0.924721
Tmem242	517.152	0.194809	0.0801091	2.43179	0.0150244	0.925965
Micb	76.2746	-0.20063	0.0817422	-2.45442	0.0141111	0.925965
Bcl3	4.99992	-0.109626	0.0446796	-2.4536	0.0141435	0.925965
Nars2	233.065	0.164515	0.0676049	2.43347	0.0149549	0.925965
LOC100910973	212.289	0.180956	0.0737735	2.45286	0.0141726	0.925965
LOC497899	27.7634	0.172348	0.0701482	2.45691	0.0140138	0.925965
Axin2	723.203	-0.161631	0.0659673	-2.45018	0.0142787	0.925965
Cmss1	534.045	0.160036	0.0656907	2.43621	0.0148422	0.925965
Tchp	813.115	-0.155541	0.0637376	-2.44033	0.0146739	0.925965
Optc	52.0747	-0.202145	0.082544	-2.44894	0.0143277	0.925965
Tmem156	4.7582	0.0909051	0.0373557	2.4335	0.0149536	0.925965
Hmgb3	183.831	0.1853	0.0758846	2.44187	0.0146115	0.925965
Pno1	728.115	0.181537	0.0745279	2.43582	0.0148581	0.925965
Meis1	524.191	-0.149387	0.0608296	-2.45583	0.0140559	0.925965
Asb3	753.4	0.159225	0.0651005	2.44583	0.0144518	0.925965
Dhrs1	502.242	-0.165408	0.0679158	-2.43549	0.0148716	0.925965
Xkr6	36.4743	-0.202199	0.0820465	-2.46445	0.0137226	0.925965
Itih1	1.95456	-0.0793765	0.0327042	-2.4271	0.0152199	0.925965
Cdo1	1446.76	0.178594	0.0731035	2.44303	0.0145643	0.925965
Tk2	732.365	0.179144	0.0733222	2.44324	0.0145559	0.925965
Slc1a3	4515.51	0.153976	0.062698	2.45583	0.0140558	0.925965
Palmd	1078.45	0.183258	0.0750011	2.4434	0.0145497	0.925965
Lrrc8a	2117.1	-0.14753	0.0606942	-2.43071	0.0150694	0.925965
Harbi1	352.286	0.194023	0.0799824	2.42582	0.0152736	0.925965
Sema3c	1765.31	0.198786	0.0804763	2.47012	0.0135068	0.925965
Fam180a	33.4311	0.163974	0.0674943	2.42945	0.0151215	0.925965
Vopp1	6365.5	0.122893	0.0498404	2.46573	0.0136736	0.925965
Kcnj8	150.521	0.18498	0.0758356	2.43923	0.0147187	0.925965
Dnai1	16.071	-0.163126	0.0666223	-2.44852	0.0143446	0.925965
Trnau1ap	1118.79	0.188079	0.0775075	2.42659	0.0152416	0.925965
Abca7	259.798	-0.15847	0.0640416	-2.47449	0.0133426	0.925965
Tmem5	502.623	0.149581	0.0612996	2.44016	0.0146806	0.925965
Trim71	1.11325	-0.0540702	0.0222786	-2.427	0.0152242	0.925965
Mageh1	1427.86	0.174032	0.0711924	2.44453	0.014504	0.925965
Arx	3221.6	-0.168739	0.0686806	-2.45686	0.0140157	0.925965
Stox1	11.0398	-0.156147	0.0644918	-2.42118	0.01547	0.929133
Uqcc1	648.584	0.131597	0.0543498	2.42129	0.0154654	0.929133
Acot9	591.016	0.183211	0.0757004	2.42022	0.0155113	0.929133
Psmd6	2827.21	0.165162	0.0682965	2.41831	0.015593	0.930318
Ust	34.4828	-0.166236	0.0746499	-2.22688	0.0259554	0.935267
Fuca2	150.591	0.19153	0.0812648	2.35686	0.0184303	0.935267
Echdc1	614.417	0.151811	0.0674048	2.25222	0.0243081	0.935267
Dll1	830.926	-0.180289	0.0803831	-2.24287	0.024905	0.935267
Ccdc61	253.949	-0.157748	0.0679261	-2.32235	0.020214	0.935267
Vasp	1245.49	-0.114011	0.0477119	-2.38956	0.0168685	0.935267
Ceacam1	101.944	-0.184188	0.0824507	-2.23392	0.0254883	0.935267
Cyp2a3	32.608	-0.0772059	0.0322776	-2.39193	0.01676	0.935267
Ech1	1056.88	0.144156	0.0614616	2.34547	0.0190032	0.935267
Vrk3	822.357	0.137765	0.0578079	2.38316	0.0171648	0.935267
Prmt3	875.129	0.105382	0.0473497	2.22561	0.02604	0.935267
Hbe1	1774.39	-0.0816196	0.0359412	-2.27092	0.0231519	0.935267
St5	776.142	-0.142412	0.0633224	-2.249	0.0245126	0.935267
Far1	699.9	0.177912	0.0746925	2.38193	0.0172222	0.935267
Gprc5b	404.686	-0.177795	0.0769817	-2.30958	0.0209115	0.935267
Acsm3	59.339	-0.18675	0.0815084	-2.29118	0.021953	0.935267
Ctf1	78.1605	-0.192846	0.0821086	-2.34867	0.0188407	0.935267
Pold4	104.248	0.186492	0.0824988	2.26054	0.0237876	0.935267
Ccdc87	1.10333	-0.0567541	0.024504	-2.31611	0.0205522	0.935267
Ankrd1	12.5403	-0.14388	0.0645783	-2.228	0.0258808	0.935267
Exoc6	538.207	0.171085	0.072189	2.36996	0.01779	0.935267
Acsl5	741.116	0.137956	0.0612295	2.25309	0.0242536	0.935267
Sox8	568.492	-0.149248	0.0670966	-2.22437	0.0261234	0.935267
Hbz	64.6536	-0.0844938	0.0356454	-2.3704	0.0177691	0.935267
Ccng1	2751.23	0.10631	0.0476665	2.23029	0.0257281	0.935267
Flt4	80.9839	-0.18346	0.0821088	-2.23436	0.0254596	0.935267
RGD1310352	2392.47	0.123996	0.0524898	2.36229	0.0181623	0.935267
Wnt3a	30.8127	-0.162446	0.0707303	-2.2967	0.0216361	0.935267
Prpsap2	2611.72	0.163752	0.0713249	2.29587	0.0216835	0.935267
Ybx2	331.839	-0.162629	0.0694506	-2.34166	0.0191983	0.935267
Smg6	920.927	-0.135465	0.0600693	-2.25514	0.0241245	0.935267
Ptrh2	1280.17	0.151579	0.0650417	2.33049	0.0197804	0.935267
Cacna1g	1360.51	-0.154464	0.0676004	-2.28496	0.0223151	0.935267
Phb	3148.22	0.173506	0.0772503	2.24603	0.0247023	0.935267
Stac2	197.628	-0.189835	0.080436	-2.36008	0.0182712	0.935267
Rara	686.645	-0.141401	0.0629093	-2.2477	0.0245951	0.935267
Ccr7	3.96857	-0.102669	0.044432	-2.3107	0.0208494	0.935267
Krt12	3.39522	0.093677	0.0396596	2.36203	0.0181752	0.935267
C1ql1	63.8716	-0.186557	0.0825395	-2.26022	0.0238079	0.935267
Cep112	119.391	-0.192462	0.0815393	-2.36037	0.0182569	0.935267
Slc35a5	669.814	0.136006	0.0598476	2.27254	0.0230542	0.935267
Tbccd1	450.354	-0.156755	0.0695781	-2.25294	0.0242628	0.935267
Hic2	418.634	-0.142875	0.0635527	-2.24814	0.0245676	0.935267
Slc7a1	1747.47	-0.185182	0.0808906	-2.28928	0.0220629	0.935267
Zfp655	158.89	0.175266	0.0775918	2.25881	0.0238949	0.935267
Vamp7	251.639	0.163936	0.070278	2.33268	0.019665	0.935267
Stag3	25.7985	-0.159253	0.0688305	-2.3137	0.020684	0.935267
Trip6	412.843	-0.167785	0.0733571	-2.28723	0.0221824	0.935267
Ccl24	10.2821	0.125458	0.0559086	2.24399	0.0248333	0.935267
Msi1	2672.9	-0.153761	0.0664089	-2.31537	0.0205927	0.935267
Ube3b	2459.7	-0.131032	0.0567575	-2.30862	0.0209644	0.935267
Miat	14396.2	-0.15039	0.0667996	-2.25137	0.0243624	0.935267
Lmx1a	124.44	-0.186383	0.0816993	-2.28132	0.0225293	0.935267
Cd48	355.542	0.178557	0.0795131	2.24563	0.0247279	0.935267
Irf6	46.826	-0.186672	0.0776245	-2.40481	0.0161808	0.935267
Spata18	36.7401	-0.183141	0.0802289	-2.28273	0.0224464	0.935267
Ociad1	3366.14	0.139516	0.062733	2.22397	0.0261506	0.935267
Gabrg1	275.2	0.182172	0.0799542	2.27846	0.0226994	0.935267
Nsg1	17696.8	0.16702	0.0717896	2.32652	0.0199907	0.935267
Selm	966.133	0.17402	0.0778547	2.23519	0.0254046	0.935267
Gatsl3	57.9695	0.184318	0.0801637	2.29927	0.0214896	0.935267
Ykt6	1637.5	0.139154	0.059326	2.34559	0.0189971	0.935267
Ppp3r1	5198.11	0.0871985	0.0385968	2.25921	0.02387	0.935267
Wdpcp	230.746	0.187608	0.0800755	2.34289	0.019135	0.935267
Dnase1l3	1.43675	0.0658127	0.0282636	2.32853	0.019884	0.935267
Tdrd3	1116.2	0.112108	0.0495487	2.26258	0.0236613	0.935267
Ndfip2	1466.38	0.159664	0.0709201	2.25132	0.0243651	0.935267
Slc35e1	1510.75	-0.12138	0.0538472	-2.25415	0.0241867	0.935267
Kbtbd11	609.114	-0.173347	0.0756933	-2.29013	0.022014	0.935267
Carkd	970.811	0.172902	0.0722729	2.39235	0.016741	0.935267
Uqcrfs1	3611.91	0.175112	0.0777501	2.25224	0.0243071	0.935267
Cul2	1958.16	0.147377	0.0623454	2.36388	0.0180845	0.935267
C1ql3	122.064	0.185432	0.0824442	2.24918	0.0245009	0.935267
Mbd2	572.174	-0.130768	0.0570434	-2.29243	0.0218807	0.935267
Dok4	1704.67	0.145179	0.0608638	2.38531	0.0170645	0.935267
Pard6a	243.853	0.183774	0.076345	2.40716	0.0160773	0.935267
Klhl36	197.624	-0.149683	0.0671423	-2.22933	0.0257918	0.935267
Kcnk1	363.39	-0.165956	0.0712779	-2.3283	0.0198961	0.935267
Map3k1	275.551	-0.168686	0.0703864	-2.39657	0.0165491	0.935267
Ccno	23.0606	-0.168655	0.071027	-2.37452	0.017572	0.935267
Ralyl	443.788	0.187337	0.0784072	2.38928	0.0168814	0.935267
Adad1	3.77805	-0.0811118	0.035759	-2.26829	0.0233115	0.935267
Lrrc71	620.882	-0.145188	0.0629914	-2.30488	0.0211733	0.935267
Mcoln3	2.75453	-0.0852347	0.0375855	-2.26775	0.0233442	0.935267
RT1-DOb	24.9035	-0.1639	0.0725848	-2.25805	0.0239426	0.935267
Ppard	424.748	-0.150311	0.0652103	-2.30501	0.0211658	0.935267
Zfand3	3023.07	-0.120182	0.0518227	-2.31911	0.0203892	0.935267
Edar	10.2169	0.133366	0.0578872	2.3039	0.0212281	0.935267
Tacr2	23.9266	0.169696	0.0714881	2.37377	0.0176076	0.935267
Vps26a	861.693	0.140461	0.0617824	2.27349	0.0229969	0.935267
Slc2a6	950.354	-0.142632	0.0638084	-2.23531	0.0253967	0.935267
RGD1564114	38.8892	-0.185111	0.0802148	-2.30769	0.0210163	0.935267
Gtdc1	1111.74	0.155631	0.0673719	2.31003	0.0208867	0.935267
Psmd14	3255.84	0.180472	0.0788508	2.28878	0.0220919	0.935267
Sp9	1059.47	-0.174329	0.0773595	-2.25349	0.0242281	0.935267
Pde1a	297.492	0.184638	0.08102	2.27891	0.0226723	0.935267
Ttc17	1107.42	-0.132934	0.0559995	-2.37385	0.0176038	0.935267
Ccdc32	1089.83	0.167725	0.0707243	2.37153	0.0177147	0.935267
Gatm	825.32	0.179476	0.0797224	2.25126	0.0243688	0.935267
Dtd1	2552.21	0.167557	0.0734938	2.27987	0.0226152	0.935267
Napb	267.554	0.159012	0.0706249	2.25149	0.0243543	0.935267
Plagl2	601.758	-0.168646	0.0731876	-2.30429	0.0212062	0.935267
Zfp217	300.143	-0.176369	0.0784536	-2.24807	0.0245718	0.935267
Htr5a	17.5372	-0.155066	0.0649215	-2.38852	0.0169166	0.935267
Fgl2	22.4312	-0.170603	0.0755581	-2.25791	0.0239513	0.935267
LOC500034	422.046	0.16056	0.0684547	2.34549	0.0190022	0.935267
ST7	967.066	0.14079	0.0623678	2.25741	0.0239827	0.935267
Cpa5	2.20502	0.0714012	0.0317007	2.25236	0.0242998	0.935267
Malsu1	486.297	0.182186	0.0781953	2.32988	0.0198124	0.935267
Tril	618.548	-0.192291	0.0813201	-2.36462	0.0180487	0.935267
Pdzrn3	1591.75	0.147808	0.0632067	2.33849	0.019362	0.935267
Thumpd3	1457.13	0.173986	0.0767946	2.2656	0.0234759	0.935267
B4galnt3	7.3893	-0.0989709	0.0435244	-2.27392	0.0229709	0.935267
Plekha5	1404.31	-0.121118	0.052712	-2.29774	0.0215769	0.935267
RGD1305420	105.831	0.197228	0.0824264	2.39278	0.0167213	0.935267
Nans	1565.46	0.156255	0.0690937	2.26149	0.0237287	0.935267
Hdhd3	45.7647	0.188852	0.0824998	2.28912	0.0220724	0.935267
Tal1	54.8686	-0.194412	0.0823575	-2.36058	0.0182463	0.935267
Nfyc	1783.41	-0.0972568	0.0417021	-2.33218	0.0196911	0.935267
Dnali1	58.9035	-0.185024	0.0825434	-2.24154	0.0249914	0.935267
Lck	170.573	0.184176	0.0784446	2.34785	0.0188822	0.935267
Cdc42	6140.88	0.122118	0.0518764	2.35401	0.018572	0.935267
Spsb1	101.946	0.178498	0.0785688	2.27187	0.0230946	0.935267
Laptm4a	5921.33	0.165455	0.0703722	2.35115	0.0187157	0.935267
Fam49a	2209.89	0.183598	0.0794311	2.31141	0.0208104	0.935267
Iah1	860.747	0.181049	0.0797098	2.27136	0.0231254	0.935267
Adam17	641.889	-0.150896	0.0678729	-2.22322	0.026201	0.935267
Ywhaq	22485.7	0.170159	0.0734167	2.31772	0.0204645	0.935267
Calm1	16886.2	0.111866	0.0500334	2.23583	0.0253628	0.935267
Gdf11	1275.44	-0.135967	0.0587169	-2.31564	0.0205778	0.935267
Zbtb7a	508.826	-0.15356	0.0647925	-2.37003	0.0177868	0.935267
Gadd45b	49.5591	0.185595	0.0818489	2.26754	0.0233574	0.935267
Dot1l	2711.99	-0.140371	0.0620056	-2.26385	0.0235833	0.935267
Mob3a	1938.63	-0.111718	0.0496981	-2.24794	0.0245799	0.935267
R3hdm4	4897.31	-0.103395	0.045566	-2.26912	0.023261	0.935267
Cyp4f6	75.7894	-0.177603	0.0794702	-2.23484	0.0254279	0.935267
Pwp1	1099.16	0.124256	0.0533958	2.32708	0.0199611	0.935267
Atxn7l3b	16744.6	0.137809	0.058011	2.37557	0.0175221	0.935267
Osr2	5.37087	-0.116608	0.0522988	-2.22966	0.0257703	0.935267
Emc2	1076.05	0.157695	0.0673239	2.34233	0.019164	0.935267
Pycrl	1542.5	0.133862	0.0601375	2.22594	0.0260184	0.935267
Sox10	185.721	-0.179847	0.0792418	-2.26959	0.0232322	0.935267
Arfgap3	637.799	-0.13868	0.0587448	-2.36073	0.0182391	0.935267
Col2a1	1019.52	-0.181047	0.077584	-2.33356	0.0196187	0.935267
Bcdin3d	250.551	0.169408	0.0719986	2.35294	0.0186258	0.935267
Smarcd1	6525.4	-0.136208	0.0575151	-2.36822	0.0178738	0.935267
S1pr2	285.824	-0.144862	0.062679	-2.31117	0.0208233	0.935267
Rexo2	1029.14	0.130182	0.0582358	2.23542	0.0253896	0.935267
Mpi	802.314	0.114627	0.0494157	2.31964	0.0203604	0.935267
Uaca	414.536	-0.173621	0.0756788	-2.29418	0.0217801	0.935267
LOC100363289	13.4117	-0.151931	0.0672011	-2.26085	0.0237687	0.935267
Tmem30a	2087.98	0.119916	0.0531833	2.25477	0.0241478	0.935267
Pls1	23.9347	-0.152263	0.0669867	-2.27303	0.0230244	0.935267
Lztfl1	640.692	0.17864	0.0801876	2.22777	0.0258957	0.935267
Brcc3	900.973	0.125999	0.0541041	2.32882	0.0198687	0.935267
Mdfi	85.2249	-0.183421	0.0825299	-2.22248	0.0262509	0.935267
Trerf1	723.284	-0.156343	0.0672874	-2.32351	0.0201516	0.935267
Glyatl3	5.34863	-0.068585	0.0308198	-2.22535	0.0260575	0.935267
Ptp4a1	1758	0.141177	0.063511	2.22288	0.0262239	0.935267
Ccdc115	361.016	0.170246	0.0728983	2.33539	0.019523	0.935267
Wdr75	1262.3	0.140065	0.0628517	2.2285	0.025847	0.935267
Aox2	34.4348	-0.0880361	0.0374295	-2.35205	0.0186702	0.935267
Scly	152.618	-0.1737	0.0727118	-2.38888	0.0168997	0.935267
Gpc1	5937.21	-0.130465	0.0575072	-2.26867	0.0232882	0.935267
Gpr165	101.177	0.190306	0.082544	2.3055	0.0211383	0.935267
Cdx4	2.60238	0.0748589	0.0311469	2.40342	0.0162426	0.935267
Abcb7	429.801	0.169492	0.0752253	2.25313	0.0242509	0.935267
Pcdh11x	257.913	0.184473	0.0818281	2.2544	0.0241711	0.935267
Armcx6	362.86	0.154657	0.0645497	2.39593	0.0165781	0.935267
Nsdhl	707.253	0.136764	0.0614388	2.22602	0.026013	0.935267
Stmn1	70580	0.154741	0.0696725	2.22098	0.0263522	0.936656
Slc12a9	425.476	-0.162503	0.0733767	-2.21465	0.0267843	0.940267
Gtf2f2	657.183	0.172786	0.0779098	2.21778	0.0265702	0.940267
Chac1	141.469	-0.167288	0.0756047	-2.21266	0.026921	0.940267
Cntfr	1247.4	-0.166732	0.0753544	-2.21264	0.0269226	0.940267
Slc25a33	380.322	0.153664	0.069459	2.21229	0.0269464	0.940267
Plekhg5	640.976	-0.159094	0.0719174	-2.21218	0.0269541	0.940267
Slc39a9	607.29	0.132617	0.0598451	2.21601	0.0266908	0.940267
Bivm	1437.82	0.152069	0.0686124	2.21635	0.0266672	0.940267
Aspdh	91.7371	-0.180027	0.0814153	-2.21122	0.0270206	0.940403
Nsmce1	775.118	0.17929	0.0814591	2.20098	0.0277377	0.945491
Bbs1	964.828	-0.159978	0.0725409	-2.20535	0.0274296	0.945491
Zfp2	892.396	0.171594	0.0779469	2.20142	0.0277062	0.945491
Arpc3	3065.61	0.165419	0.0750659	2.20365	0.027549	0.945491
Dsel	687.595	0.160345	0.0726528	2.207	0.0273142	0.945491
Mrpl34	1064.88	0.157047	0.0713052	2.20246	0.0276328	0.945491
Txndc15	1660.94	0.141816	0.064336	2.2043	0.0275031	0.945491
Fam3c	1616.03	0.121773	0.0553475	2.20016	0.0277956	0.945491
Jagn1	792.644	0.171295	0.0777843	2.20218	0.0276525	0.945491
Tbc1d8	408.579	-0.131325	0.0595314	-2.20597	0.0273859	0.945491
Alpi	4.72956	0.105501	0.0479836	2.19869	0.0279	0.9469
Ebf3	272.357	-0.179355	0.0824978	-2.17406	0.0297007	0.955707
Map3k11	516.802	-0.131075	0.0603116	-2.17329	0.0297585	0.955707
Mat2b	814.097	0.142356	0.0653129	2.1796	0.0292873	0.955707
Trim41	1464.34	-0.107201	0.0490011	-2.18772	0.0286898	0.955707
Hist3h2ba	4110.98	0.173951	0.0797863	2.18021	0.029242	0.955707
Rxrg	1097.62	-0.17588	0.0802634	-2.19128	0.0284314	0.955707
Zmiz2	164.955	-0.166843	0.0767566	-2.17366	0.0297304	0.955707
Efemp1	123.764	0.168546	0.077566	2.17294	0.0297851	0.955707
Fermt2	1903.41	-0.1046	0.0478792	-2.18466	0.0289137	0.955707
Pik3c3	804.22	0.122252	0.056174	2.17632	0.0295316	0.955707
Mlycd	393.259	-0.128481	0.0591378	-2.17258	0.0298122	0.955707
Sf3b4	2556.16	-0.11766	0.0539745	-2.17992	0.0292635	0.955707
Slc28a2	361.918	0.180011	0.08208	2.19311	0.0282992	0.955707
Cdh22	354.075	-0.162603	0.0741942	-2.19159	0.0284092	0.955707
Lep	11.2262	-0.143235	0.0653146	-2.193	0.0283076	0.955707
Slc26a7	77.8341	0.170116	0.0779404	2.18264	0.0290626	0.955707
Tmem69	606.63	0.163714	0.0747674	2.18964	0.0285502	0.955707
Gareml	525.878	-0.157494	0.0719955	-2.18755	0.0287023	0.955707
Eif2s1	2756.02	0.17628	0.0806631	2.18539	0.0288605	0.955707
Ankrd9	56.1512	-0.179075	0.0822792	-2.17644	0.0295227	0.955707
Rrm2b	118.05	0.171432	0.0786395	2.17998	0.0292591	0.955707
Dcaf13	994.168	0.130874	0.0599004	2.18486	0.0288991	0.955707
Ube3d	159.233	-0.17609	0.0810006	-2.17393	0.0297104	0.955707
LOC100360552	270.846	-0.164066	0.075405	-2.1758	0.02957	0.955707
Jade3	302.863	0.151635	0.0694477	2.18345	0.0290031	0.955707
C1galt1c1	438.884	0.17938	0.082529	2.17354	0.0297399	0.955707
Cct4	8902.79	0.145795	0.0671631	2.17076	0.0299491	0.956252
Rab25	6.77951	-0.112796	0.0519636	-2.17067	0.0299564	0.956252
Tmem199	754.815	0.155058	0.0714877	2.16901	0.030082	0.956548
Lmf2	1370.57	-0.129391	0.0596584	-2.16887	0.0300929	0.956548
Nudt14	403.061	0.178201	0.0822214	2.16733	0.0302094	0.958224
Prmt1	6445.08	0.165392	0.0765866	2.15954	0.0308085	0.963172
Bloc1s2	1402.35	0.171913	0.0796001	2.15971	0.0307954	0.963172
Ndfip1	6471.71	0.137576	0.0637082	2.15947	0.0308138	0.963172
Dhodh	338.116	0.156816	0.0725732	2.1608	0.0307106	0.963172
Tmem154	4.15987	-0.0939828	0.0434796	-2.16154	0.0306539	0.963172
Slc32a1	1506.21	-0.150194	0.0694257	-2.16338	0.0305123	0.963172
Map2k2	2805.94	-0.114442	0.0529074	-2.16306	0.0305362	0.963172
Gtse1	598.752	-0.173911	0.0805958	-2.15782	0.0309418	0.965164
Fbxw5	1754.85	-0.0992446	0.0460611	-2.15463	0.0311909	0.970921
LOC690918	13.6887	0.149978	0.0696868	2.15217	0.0313841	0.974918
Hirip3	1015.86	-0.110932	0.0518243	-2.14054	0.0323113	0.976218
Sirt3	534.663	0.150411	0.0701251	2.14489	0.0319617	0.976218
Maml1	1239.25	-0.147331	0.0687876	-2.14182	0.0322079	0.976218
Slc16a6	249.28	-0.164868	0.0770318	-2.14026	0.0323337	0.976218
Ociad2	567.657	0.159385	0.0745123	2.13904	0.0324323	0.976218
Acox3	445.041	-0.140158	0.0653737	-2.14395	0.0320373	0.976218
Pibf1	469.596	0.149461	0.069885	2.13867	0.032462	0.976218
Gatad2a	3109.22	-0.112652	0.0525662	-2.14306	0.0321085	0.976218
Zfp458	146.458	0.171528	0.0797568	2.15064	0.0315044	0.976218
Gcg	80.7765	0.175247	0.0817506	2.14368	0.0320585	0.976218
Alk	76.7922	-0.176576	0.0824708	-2.14107	0.0322682	0.976218
Coq6	877.522	0.155161	0.0724508	2.14161	0.0322249	0.976218
Tbk1	875.651	0.139523	0.065239	2.13864	0.0324648	0.976218
Dennd6b	982.836	-0.130693	0.0608815	-2.14668	0.0318188	0.976218
Tpbg	676.237	-0.176129	0.082097	-2.14537	0.0319231	0.976218
Glra4	1.14093	-0.0499873	0.0233088	-2.14457	0.0319872	0.976218
Zc3h12d	5.4397	-0.0918459	0.0493412	-1.86145	0.0626813	0.976245
Pex3	623.895	0.13361	0.0659767	2.02511	0.0428562	0.976245
Rn5-8s	1.61722	-0.0569111	0.0273818	-2.07843	0.0376697	0.976245
Rnf146	1544.09	0.112745	0.0575384	1.95947	0.0500575	0.976245
Rmnd1	694.636	0.137872	0.0687918	2.00419	0.0450499	0.976245
Cnksr3	120.036	-0.142187	0.0777952	-1.82771	0.0675936	0.976245
Rnaset2	589.928	0.149573	0.0759163	1.97024	0.0488111	0.976245
Has1	24.3097	-0.162789	0.0781509	-2.083	0.0372509	0.976245
Zfp53	210.501	0.149062	0.0811433	1.83702	0.0662076	0.976245
Zfp579	1297.5	-0.109811	0.0526098	-2.08728	0.0368628	0.976245
Ppp6r1	2777.86	-0.0990089	0.0523886	-1.88989	0.0587722	0.976245
Dnaaf3	91.6638	-0.172069	0.0824441	-2.0871	0.0368788	0.976245
Fkrp	430.546	-0.120454	0.0627821	-1.9186	0.055035	0.976245
Snrpd2	3935.62	0.156527	0.0824402	1.89867	0.0576073	0.976245
Zfp94	384.866	0.13288	0.066537	1.99709	0.0458156	0.976245
Lypd3	52.5119	-0.170254	0.0822387	-2.07025	0.0384292	0.976245
Lipe	356.22	-0.13137	0.0666739	-1.97034	0.0487998	0.976245
Tgfb1	193.525	-0.149814	0.0752377	-1.99121	0.0464581	0.976245
Samd4b	2512.16	-0.120251	0.0633684	-1.89765	0.0577425	0.976245
Catsperg1	71.1598	-0.16778	0.0820445	-2.04499	0.0408556	0.976245
Lrfn3	848.207	-0.140424	0.0683422	-2.05472	0.0399065	0.976245
Lgi4	47.4049	-0.139877	0.0661858	-2.1134	0.0345664	0.976245
Nudt19	299.078	0.141197	0.0754464	1.87149	0.0612774	0.976245
Fv1	4077.47	0.123609	0.0668813	1.84818	0.0645758	0.976245
Nr1h2	1497.79	-0.0829956	0.0428487	-1.93695	0.052752	0.976245
Atf5	696.053	-0.150216	0.0800506	-1.87651	0.0605849	0.976245
Gys1	731.437	-0.138246	0.0671951	-2.05738	0.0396496	0.976245
Atp10a	51.3228	-0.1706	0.082539	-2.0669	0.0387435	0.976245
Tm2d3	315.741	0.144132	0.0737814	1.9535	0.0507606	0.976245
Pcsk6	161.274	-0.156382	0.0818499	-1.91059	0.0560574	0.976245
Vimp	792.3	0.149925	0.0795413	1.88487	0.0594474	0.976245
Echs1	27.0488	0.145009	0.0780133	1.85877	0.0630596	0.976245
Prss23	154.143	0.151764	0.0792512	1.91498	0.0554954	0.976245
l7Rn6	1582.38	0.143317	0.0775346	1.84843	0.0645399	0.976245
Slco2b1	156.115	-0.146886	0.0804035	-1.82686	0.0677208	0.976245
P2ry2	2.97799	-0.067723	0.0353849	-1.91389	0.055634	0.976245
Folr2	11.8175	-0.137842	0.0662349	-2.08111	0.0374242	0.976245
Nlrp10	0.6011	0.0309701	0.0169772	1.82421	0.0681196	0.976245
Insc	10.3781	0.121833	0.062966	1.93489	0.0530032	0.976245
Arhgap17	508.53	-0.149461	0.0748172	-1.99768	0.0457516	0.976245
Apobr	21.4688	0.145852	0.0766782	1.90213	0.0571547	0.976245
Gdpd3	2.4962	-0.0724686	0.0365898	-1.98057	0.0476396	0.976245
Spn	23.6031	-0.147561	0.0792661	-1.86159	0.0626611	0.976245
Tbc1d10b	2561.8	-0.09823	0.0505395	-1.94363	0.0519403	0.976245
Orai3	202.848	-0.147517	0.0723485	-2.03898	0.0414521	0.976245
Kat8	952.623	0.112466	0.0601252	1.87052	0.0614115	0.976245
Ikzf5	872.533	0.134007	0.072659	1.84433	0.065135	0.976245
Glrx3	3706.04	0.136068	0.0734712	1.85199	0.0640273	0.976245
Bnip3	1221.27	0.173073	0.0812533	2.13005	0.0331676	0.976245
Bet1l	866.975	0.151899	0.0741185	2.0494	0.0404226	0.976245
Ric8a	2135.89	0.104017	0.0523444	1.98716	0.0469043	0.976245
Th	17.1871	-0.119824	0.0589202	-2.03366	0.0419862	0.976245
Slc22a18	8.23529	0.115004	0.0572249	2.00968	0.044465	0.976245
Cdk2ap2	583.547	0.117052	0.0618486	1.89255	0.0584172	0.976245
Ptprcap	31.8844	-0.14355	0.076785	-1.86951	0.0615518	0.976245
Men1	2491.93	-0.0939915	0.0513536	-1.83028	0.0672076	0.976245
Esrra	844.936	0.111886	0.0612828	1.82572	0.0678917	0.976245
Gpr137	1150.28	-0.117299	0.0633259	-1.85231	0.0639814	0.976245
Mark2	1605.92	-0.11169	0.0581856	-1.91955	0.0549152	0.976245
Fen1	678.953	-0.13857	0.0759376	-1.82479	0.0680322	0.976245
LOC499331	1333.61	0.11356	0.0603469	1.88178	0.0598655	0.976245
Abhd17b	550.46	0.13159	0.0698012	1.88521	0.0594014	0.976245
Cbwd1	250.868	0.14821	0.0747832	1.98187	0.047494	0.976245
Dmrt3	131.814	-0.154431	0.0823758	-1.87471	0.0608323	0.976245
Ppp1r3c	280.367	0.149057	0.079868	1.86629	0.0620008	0.976245
Noc3l	602.014	0.0957806	0.0505484	1.89483	0.058115	0.976245
Blnk	59.2068	-0.15496	0.0821109	-1.8872	0.059133	0.976245
Trim8	4031.55	-0.120089	0.0562386	-2.13536	0.0327319	0.976245
Obfc1	629.786	0.146135	0.0724423	2.01726	0.0436685	0.976245
Shoc2	1458.14	0.101211	0.0533713	1.89635	0.0579135	0.976245
Vax1	175.778	-0.160837	0.0807063	-1.99287	0.0462758	0.976245
Tmem186	709.491	0.150881	0.0746465	2.02127	0.0432519	0.976245
Tsc2	3208.6	-0.0896831	0.0465893	-1.92497	0.0542327	0.976245
Capn15	1135.29	-0.10174	0.0530372	-1.91827	0.0550763	0.976245
Tmem8a	145.083	0.155831	0.0787914	1.97777	0.0479549	0.976245
Gabrb2	355.967	0.165848	0.0825436	2.00922	0.0445136	0.976245
RGD1564036	446.376	0.119127	0.0645801	1.84464	0.0650902	0.976245
Ltc4s	24.0929	-0.14935	0.0743382	-2.00906	0.0445307	0.976245
Sar1b	1765.18	0.152029	0.0815261	1.86479	0.0622109	0.976245
Tnip1	416.09	-0.129391	0.0659819	-1.961	0.049879	0.976245
Galnt10	494.985	-0.152416	0.0734023	-2.07645	0.0378527	0.976245
Hist3h2a	2063.2	0.156815	0.0821929	1.90789	0.0564059	0.976245
Prss38	1.35751	-0.0481587	0.0263602	-1.82694	0.0677082	0.976245
Adprm	411.895	0.167508	0.0787866	2.1261	0.0334951	0.976245
Sco1	435.01	0.158775	0.0773086	2.05378	0.0399973	0.976245
Myh2	48.2925	-0.138178	0.0710645	-1.9444	0.0518471	0.976245
Cldn7	3.78459	-0.0477903	0.0231252	-2.06659	0.0387724	0.976245
Clec10a	37.2465	0.155057	0.0738301	2.10018	0.0357131	0.976245
Vmo1	21.4329	-0.0980248	0.0480868	-2.0385	0.0415004	0.976245
LOC691995	13703.3	0.111973	0.0594249	1.88428	0.0595273	0.976245
Fam222b	1270.6	-0.125118	0.0636916	-1.96444	0.0494791	0.976245
Omg	178.893	0.155375	0.078926	1.96862	0.0489967	0.976245
Hnf1b	10.8913	-0.11917	0.0592763	-2.01042	0.0443872	0.976245
Ggnbp2	1810.2	0.0909382	0.0470799	1.93157	0.0534122	0.976245
Ifi35	54.2349	-0.153808	0.0824824	-1.86473	0.0622188	0.976245
Vat1	5097.3	-0.101556	0.0538771	-1.88495	0.0594362	0.976245
Dcakd	4364.03	-0.121759	0.0667426	-1.8243	0.068106	0.976245
Cdc42ep4	3035.47	-0.0959976	0.0495999	-1.93544	0.0529362	0.976245
Hn1	17525.1	0.134318	0.0715212	1.87801	0.0603793	0.976245
Gga3	1891.39	-0.107551	0.05685	-1.89184	0.058512	0.976245
Grb2	2251.8	0.0969386	0.0483539	2.00477	0.0449872	0.976245
Foxj1	424.241	-0.157662	0.0817365	-1.9289	0.0537433	0.976245
Mgat5b	3641.23	-0.107843	0.0589001	-1.83095	0.0671079	0.976245
Notum	18.738	-0.127699	0.062626	-2.03908	0.0414425	0.976245
Wdr45b	1042.62	0.146479	0.0753816	1.94317	0.0519957	0.976245
Adamts1	162.764	-0.15949	0.0823496	-1.93674	0.0527766	0.976245
Cryzl1	1386.99	0.164691	0.0788543	2.08855	0.036748	0.976245
Wrb	2270.5	0.106179	0.0533689	1.98953	0.0466431	0.976245
Senp7	1225.62	0.0995386	0.0543637	1.83098	0.0671041	0.976245
Cd200	3366.99	0.130924	0.070637	1.85347	0.0638148	0.976245
Igsf11	649.022	-0.146571	0.0745281	-1.96666	0.0492226	0.976245
B4galt4	415.816	-0.146415	0.0790326	-1.85259	0.0639414	0.976245
Sec22a	407.447	0.153155	0.0807468	1.89673	0.0578641	0.976245
Tnk2	1659.27	-0.125631	0.0649262	-1.93498	0.0529933	0.976245
Ubxn7	100.814	0.154323	0.0811034	1.90279	0.0570676	0.976245
Rtp1	1.25416	-0.0390314	0.0189817	-2.05626	0.0397575	0.976245
Eif4a2	11970.8	0.159385	0.0764963	2.08356	0.0372002	0.976245
Klhl24	3947.04	0.115447	0.0607112	1.90157	0.0572273	0.976245
Arvcf	3545.27	-0.107071	0.0582986	-1.8366	0.0662697	0.976245
Radil	299.171	-0.137521	0.0729715	-1.88459	0.0594851	0.976245
Dnm1l	2167.12	0.0879908	0.0476779	1.84552	0.0649614	0.976245
Rxfp2	3.43453	-0.0727246	0.0393221	-1.84946	0.064392	0.976245
Gsx1	29.4568	-0.145788	0.075458	-1.93204	0.053355	0.976245
Baiap2l1	50.4031	-0.173986	0.0814345	-2.13652	0.0326371	0.976245
Ppil2	1293.23	0.124233	0.0659877	1.88267	0.0597451	0.976245
Ttyh3	17467.2	-0.127015	0.0599559	-2.11847	0.0341357	0.976245
LOC498154	314.216	-0.140787	0.0712949	-1.97472	0.0483001	0.976245
Dnaaf5	353.426	-0.14019	0.066631	-2.10398	0.0353804	0.976245
Zfp68	4934.94	0.146981	0.0779306	1.88604	0.059289	0.976245
Mir106b	2.43623	-0.059175	0.0319205	-1.85382	0.0637646	0.976245
Mblac1	131.184	0.16767	0.0823913	2.03505	0.0418463	0.976245
Tfr2	92.578	-0.152726	0.0825297	-1.85056	0.0642328	0.976245
Cldn4	2.11055	-0.0445352	0.0240352	-1.85291	0.0638947	0.976245
Zbed5	1039.85	0.148698	0.0754384	1.97112	0.0487096	0.976245
Cct6a	6513.22	0.0992071	0.0524855	1.89018	0.0587339	0.976245
Slc15a4	586.906	0.108407	0.0565268	1.91779	0.0551375	0.976245
Gtf2h3	768.176	0.120022	0.0636888	1.8845	0.059497	0.976245
Pitpnm2	2372.16	-0.130706	0.0683911	-1.91115	0.0559847	0.976245
Vps37b	2129.57	-0.10373	0.0566077	-1.83243	0.0668872	0.976245
Fam216a	1130.53	0.154392	0.0745673	2.0705	0.0384055	0.976245
Pebp1	10505.5	0.131104	0.0687511	1.90693	0.0565297	0.976245
Rnf10	9246.51	-0.109413	0.0528558	-2.07002	0.0384504	0.976245
Trpv4	42.2174	-0.135319	0.0694256	-1.94912	0.0512806	0.976245
Fam222a	313.456	-0.132365	0.0714482	-1.85261	0.0639389	0.976245
Asphd2	421.436	-0.135238	0.0645011	-2.09668	0.0360216	0.976245
Nifk	988.03	0.153565	0.0745566	2.05971	0.0394262	0.976245
Btg2	1352.65	-0.166365	0.0817467	-2.03513	0.041838	0.976245
Chit1	9.08649	-0.118767	0.0600841	-1.97669	0.0480771	0.976245
Timm17a	788.378	0.147924	0.0737871	2.00475	0.0449902	0.976245
Ptgs2	4.90829	-0.0707128	0.0373545	-1.89302	0.0583551	0.976245
Soat1	199.926	-0.149239	0.0760242	-1.96304	0.0496415	0.976245
Mettl13	696.684	-0.0951816	0.0475437	-2.00198	0.0452867	0.976245
Tiprl	1958.3	0.156038	0.0735036	2.12287	0.0337651	0.976245
Tmco1	466.596	0.150216	0.0790016	1.90143	0.0572461	0.976245
Cfap126	246.067	-0.158955	0.0800532	-1.98561	0.0470761	0.976245
Fcer1g	154.136	-0.14609	0.0792939	-1.84239	0.0654188	0.976245
Adamts4	26.2799	-0.155732	0.0788655	-1.97465	0.0483078	0.976245
Pex19	356.006	0.126337	0.0627062	2.01474	0.0439318	0.976245
Igsf9	2990.63	-0.105462	0.0568306	-1.85573	0.0634928	0.976245
Vsig8	4.15497	-0.0831188	0.0413524	-2.01001	0.0444301	0.976245
Dusp23	75.62	0.155713	0.0818599	1.90219	0.0571468	0.976245
Disp1	574.118	-0.129951	0.0645479	-2.01325	0.0440887	0.976245
Brox	3442.47	0.0962833	0.0509724	1.88893	0.0589013	0.976245
Prkg2	90.1267	-0.172715	0.0821241	-2.1031	0.0354574	0.976245
G3bp2	3236.96	0.120074	0.0568055	2.11377	0.0345349	0.976245
Rassf6	21.0525	0.136516	0.0674694	2.02338	0.0430342	0.976245
Rufy3	4733.9	0.103168	0.0544447	1.89492	0.0581034	0.976245
Cwh43	1.3445	-0.0514015	0.0251477	-2.04399	0.040955	0.976245
Gabrb1	44.3951	0.161414	0.0810631	1.99122	0.046457	0.976245
Gabra4	217.906	0.143129	0.0783774	1.82615	0.0678275	0.976245
Guf1	971.786	0.134668	0.0737574	1.82583	0.0678758	0.976245
Rab5a	793.495	0.116056	0.0573956	2.02203	0.0431733	0.976245
Evc	289.892	-0.157035	0.0815763	-1.925	0.0542289	0.976245
Bloc1s4	477.121	0.146258	0.0779652	1.87595	0.0606627	0.976245
Ctbp1	9853.65	-0.0786743	0.0405218	-1.94153	0.052194	0.976245
Sec14l2	206.001	-0.152192	0.0813925	-1.86985	0.0615045	0.976245
Igfbp3	629.638	0.158206	0.0817844	1.93442	0.053061	0.976245
Tns3	901.163	-0.155697	0.0795673	-1.95679	0.0503718	0.976245
Vwc2	97.6253	0.171402	0.0822741	2.0833	0.0372237	0.976245
Ikzf1	107.268	-0.148549	0.0803226	-1.8494	0.0643996	0.976245
Mdh1	5844.85	0.113825	0.0575852	1.97664	0.0480822	0.976245
Acyp2	103.706	0.15618	0.0798046	1.95703	0.0503435	0.976245
Ube2e2	916.827	0.123567	0.0676672	1.8261	0.0678358	0.976245
Acox2	4.8784	0.0762693	0.0410821	1.85651	0.0633806	0.976245
LOC498460	0.647479	0.0345715	0.0178995	1.93142	0.0534306	0.976245
Rmrp	58.747	-0.135585	0.0645051	-2.10193	0.0355594	0.976245
Tmem55b	1436.89	0.115183	0.0572862	2.01066	0.0443611	0.976245
Arhgef40	1709.23	-0.134208	0.0645834	-2.07806	0.0377041	0.976245
Zfp219	1987.77	-0.147478	0.0756803	-1.9487	0.051331	0.976245
Psmb5	4262.65	0.167192	0.0790292	2.11558	0.0343809	0.976245
Acin1	7900.8	-0.0780261	0.0422489	-1.84682	0.0647729	0.976245
Dhrs4	765.058	0.149321	0.0741635	2.0134	0.0440724	0.976245
Psme1	1655.2	0.153981	0.07439	2.06992	0.0384596	0.976245
Nfatc4	326.142	-0.166555	0.0802803	-2.07467	0.0380168	0.976245
Mcpt1l1	8.77161	-0.0611789	0.0323364	-1.89195	0.0584975	0.976245
Rnf17	0.929794	0.0401337	0.021213	1.89194	0.0584994	0.976245
Pspc1	1837.62	0.0912527	0.049505	1.8433	0.0652849	0.976245
Spata13	327.071	-0.154254	0.082475	-1.87031	0.061441	0.976245
Wdfy2	702.445	-0.121836	0.0637161	-1.91217	0.0558544	0.976245
Zfp395	451.407	-0.140369	0.0702126	-1.9992	0.0455862	0.976245
Lmo7	388.515	0.161557	0.081665	1.97829	0.047896	0.976245
Wnt5a	484.505	-0.128009	0.0680067	-1.88229	0.0597962	0.976245
Parg	1109.67	0.0906671	0.0459927	1.97133	0.0486856	0.976245
Ap1m1	3664.32	-0.0826338	0.0453079	-1.82383	0.0681781	0.976245
Rab8a	1829.21	-0.0888842	0.0469041	-1.89502	0.0580897	0.976245
Nr2f6	503.385	-0.13681	0.0686229	-1.99366	0.0461896	0.976245
Fam129c	42.7733	0.114073	0.0610577	1.86828	0.0617226	0.976245
Ell	693.637	-0.11191	0.0591991	-1.8904	0.0587039	0.976245
Dctn6	1888.42	0.125113	0.0676989	1.84807	0.0645918	0.976245
Gtf2e2	909.628	0.141317	0.0764197	1.84922	0.0644256	0.976245
Ppp2cb	4106.96	-0.0751307	0.0390669	-1.92313	0.0544635	0.976245
Mak16	779.481	0.130728	0.0698359	1.87194	0.0612151	0.976245
Vdac3	5807.78	0.134744	0.068727	1.96057	0.0499295	0.976245
Slc20a2	560.959	-0.134619	0.063826	-2.10916	0.0349307	0.976245
Agpat5	1242.04	0.101866	0.048079	2.11871	0.0341147	0.976245
Spata31d1d	7.31298	-0.109192	0.0541241	-2.01744	0.0436493	0.976245
Kif27	222.604	-0.139676	0.0738567	-1.89118	0.058601	0.976245
Tmem14c	1076.78	0.165308	0.0806507	2.04968	0.0403959	0.976245
Rala	2183.98	0.105346	0.0550903	1.91224	0.0558458	0.976245
Rab18	2095.51	0.123254	0.0610743	2.01809	0.0435816	0.976245
Akr1c14	87.1178	0.148476	0.071845	2.06661	0.0387711	0.976245
Gdi2	7182.48	0.126183	0.0654096	1.92912	0.0537155	0.976245
Sfmbt2	21.4297	0.140748	0.072202	1.94936	0.0512524	0.976245
Acbd7	2.1598	-0.0428038	0.0227122	-1.88462	0.0594813	0.976245
Rpp38	165.327	0.16745	0.0821774	2.03766	0.0415838	0.976245
Nsun6	492.01	0.143691	0.0772565	1.85992	0.0628971	0.976245
RGD1311805	1184.45	0.116139	0.0572886	2.02727	0.042635	0.976245
Rit2	587.611	0.170096	0.0814534	2.08826	0.0367743	0.976245
Zmat2	2377.41	0.113788	0.0623682	1.82445	0.0680838	0.976245
Pcdha9	36.8956	0.149003	0.0774018	1.92506	0.0542216	0.976245
Pcdhb12	104.635	0.15757	0.0814044	1.93565	0.0529107	0.976245
Rnf14	5150.78	0.109518	0.0525227	2.08515	0.0370561	0.976245
Pou4f3	0.98697	-0.0401742	0.0211277	-1.9015	0.0572368	0.976245
Eif1a	978.629	0.14376	0.0736594	1.95168	0.0509757	0.976245
Snx2	1227.86	0.143588	0.0720232	1.99363	0.0461923	0.976245
Mir145	1.00689	0.048741	0.0230445	2.11508	0.0344229	0.976245
Napg	1282.78	0.138691	0.0680976	2.03665	0.0416849	0.976245
Chmp1b	1055.59	0.146502	0.0715184	2.04845	0.040516	0.976245
RGD1562987	2215.55	0.156648	0.0824854	1.8991	0.0575511	0.976245
Hdhd2	1408.05	0.150478	0.0777182	1.93619	0.0528438	0.976245
Zfp516	669.7	-0.159458	0.0812679	-1.96213	0.0497471	0.976245
Adgrg1	5883.65	-0.148706	0.0726754	-2.04617	0.0407401	0.976245
Mt1a	101.007	-0.164691	0.082539	-1.99531	0.0460091	0.976245
Itfg1	4827.76	0.106925	0.0542039	1.97263	0.0485373	0.976245
Sall1	1899.75	-0.1494	0.0815565	-1.83186	0.0669729	0.976245
Pkn1	2452.97	-0.114005	0.0597122	-1.90924	0.0562317	0.976245
Dcaf15	1444.61	-0.0983914	0.0466823	-2.10768	0.0350586	0.976245
Mylk3	1.27494	-0.0466586	0.0242578	-1.92345	0.0544238	0.976245
Gab1	1110.41	-0.137933	0.0744514	-1.85266	0.0639315	0.976245
Acd	1259.3	-0.120672	0.0582255	-2.07249	0.0382197	0.976245
Nrn1l	6.9382	-0.10263	0.0561154	-1.8289	0.0674142	0.976245
Slc12a4	422.339	-0.154678	0.0796444	-1.94211	0.0521234	0.976245
Ddx28	348.396	0.133707	0.0661599	2.02097	0.0432827	0.976245
Tmem231	328.522	-0.111639	0.0611664	-1.82517	0.0679752	0.976245
Spg7	867.813	-0.127614	0.0639211	-1.99643	0.0458867	0.976245
Galnt2	4720.04	-0.108578	0.0556892	-1.94971	0.0512109	0.976245
Tsnax	2580.8	0.0929436	0.0462539	2.00942	0.0444925	0.976245
Glrx	1030.54	0.126044	0.0636123	1.98144	0.0475416	0.976245
Xrcc4	221.548	0.156417	0.080314	1.94757	0.0514665	0.976245
F2rl2	1.87936	-0.056136	0.030111	-1.8643	0.0622791	0.976245
Mccc2	636.799	0.139451	0.0723393	1.92773	0.0538885	0.976245
Rnf180	1043.05	0.12937	0.060653	2.13295	0.0329286	0.976245
Elovl7	34.5666	0.159716	0.0783331	2.03894	0.041456	0.976245
Ttc33	616.617	0.133264	0.0648408	2.05525	0.039855	0.976245
2023-03-11	127.283	0.154106	0.0796	1.93601	0.0528664	0.976245
Fabp4	2.00101	-0.0621354	0.0307326	-2.02181	0.043196	0.976245
Stmn2	28878.5	0.13128	0.0686399	1.91259	0.0558006	0.976245
Pkia	5143.51	0.146892	0.069944	2.10014	0.0357163	0.976245
Bhlhe22	4681.96	0.140061	0.0738189	1.89736	0.057781	0.976245
Armc1	1188.98	0.133352	0.0659548	2.02186	0.0431905	0.976245
Mecom	68.9858	-0.162102	0.0819663	-1.97767	0.0479664	0.976245
RGD1565989	1.69939	-0.0580817	0.0298518	-1.94567	0.0516945	0.976245
Maml3	257.756	-0.168096	0.0816896	-2.05774	0.0396155	0.976245
Trpc4	249.988	0.15337	0.0775853	1.9768	0.0480644	0.976245
Pfn2	471.571	0.122062	0.0659961	1.84953	0.0643808	0.976245
P2ry13	16.832	0.124937	0.0673726	1.85442	0.0636796	0.976245
Rap2b	356.283	0.12528	0.0658442	1.90267	0.0570834	0.976245
Ssr3	4275.45	0.147392	0.070189	2.09993	0.0357351	0.976245
Shox2	3.37753	-0.0645401	0.0312436	-2.0657	0.0388565	0.976245
Nmd3	724.195	0.138488	0.0732885	1.88962	0.0588083	0.976245
Schip1	2365.77	0.145658	0.0717528	2.02999	0.0423572	0.976245
Ppid	1844.31	0.12679	0.0618065	2.05141	0.0402273	0.976245
Etfdh	950.988	0.126004	0.0647016	1.94747	0.0514784	0.976245
Dear	195.278	0.135899	0.0727237	1.8687	0.0616644	0.976245
Dclk2	6583.94	-0.114667	0.0606097	-1.89189	0.0585051	0.976245
Cd1d1	23.173	0.153429	0.0777109	1.97436	0.0483405	0.976245
Cct3	7303.41	0.12796	0.0602113	2.12518	0.0335717	0.976245
Pklr	75.375	-0.154343	0.0813189	-1.898	0.0576966	0.976245
Thbs3	456.273	-0.154863	0.0736396	-2.10299	0.0354668	0.976245
Zbtb7b	41.9425	-0.152165	0.0800456	-1.90098	0.0573051	0.976245
Pmvk	700.366	0.106745	0.0566776	1.88337	0.0596497	0.976245
Lingo4	7.02785	-0.104416	0.0511384	-2.04183	0.0411685	0.976245
Pdzk1	259.647	-0.136115	0.0684304	-1.98911	0.0466893	0.976245
Fam212b	308.825	-0.128709	0.0654205	-1.96741	0.0491361	0.976245
Alx3	54.6082	-0.14921	0.0711603	-2.09681	0.0360104	0.976245
Gstm6	23.1531	0.151731	0.0719992	2.1074	0.0350828	0.976245
RGD1309139	17.6484	-0.125854	0.0663919	-1.89562	0.0580107	0.976245
Gpsm2	488.243	-0.147583	0.0765735	-1.92734	0.0539369	0.976245
Sass6	313.971	0.147585	0.0798135	1.84913	0.0644393	0.976245
Lef1	174.926	-0.164398	0.0796513	-2.06397	0.039021	0.976245
Ccbl2	598.964	0.14578	0.0697251	2.09078	0.0365479	0.976245
Ddah1	2470.35	-0.13919	0.0707233	-1.9681	0.0490566	0.976245
Nexn	97.9821	-0.154826	0.0821266	-1.88521	0.059402	0.976245
Usp33	3034.76	0.0903279	0.0483532	1.86809	0.0617501	0.976245
Clic2	23.3117	-0.152569	0.0757364	-2.01447	0.0439603	0.976245
RT1-N3	283.515	0.152161	0.0825404	1.84347	0.0652606	0.976245
Pbx2	1709.65	-0.119126	0.0597503	-1.99373	0.0461817	0.976245
Agpat1	3765.32	-0.107598	0.0568382	-1.89306	0.0583497	0.976245
Ppt2	440.621	-0.120471	0.0570857	-2.11035	0.0348281	0.976245
Nelfe	1095.85	-0.109009	0.05832	-1.86915	0.061602	0.976245
Itpr3	173.757	-0.160817	0.08226	-1.95498	0.0505851	0.976245
Mapk14	1851.01	-0.114677	0.0539721	-2.12474	0.0336083	0.976245
Tead3	229.511	-0.157192	0.0746972	-2.10439	0.0353444	0.976245
Rrp1	1249.53	-0.107328	0.0584154	-1.83732	0.0661624	0.976245
RGD1563815	0.913698	-0.040491	0.0214572	-1.88706	0.0591521	0.976245
Ppa1	2893.72	0.138983	0.0735241	1.8903	0.0587174	0.976245
Tspyl1	3144.76	0.115542	0.0547318	2.11105	0.0347681	0.976245
Sesn1	1279.84	0.129434	0.0709131	1.82525	0.0679628	0.976245
Traf2	317.361	-0.123319	0.0659698	-1.86932	0.0615778	0.976245
RGD1565512	22.1123	-0.124798	0.0682128	-1.82955	0.067318	0.976245
Med22	14.2919	-0.137899	0.0673032	-2.04892	0.0404698	0.976245
Zer1	2353.65	-0.114791	0.0601209	-1.90933	0.0562197	0.976245
Uck1	1367.29	0.147595	0.0722789	2.04202	0.0411499	0.976245
Lhx6	1920.86	-0.130681	0.0706804	-1.8489	0.0644723	0.976245
Zbtb6	1144.53	0.12156	0.0665595	1.82633	0.0678006	0.976245
Psmb7	4473.39	0.151153	0.0751514	2.01131	0.0442929	0.976245
Epc2	1491.43	0.085145	0.0459136	1.85446	0.0636733	0.976245
Rbm43	59.7036	-0.161191	0.0815505	-1.97658	0.0480891	0.976245
Kcnj3	203.377	0.162012	0.0770089	2.10381	0.0353951	0.976245
Acvr1c	11.7587	0.12315	0.0618873	1.9899	0.0466014	0.976245
Wdsub1	148.87	-0.137403	0.0743267	-1.84863	0.0645106	0.976245
Mtx2	1166.2	0.146114	0.0791587	1.84584	0.0649154	0.976245
Calcrl	103.2	0.153062	0.080294	1.90627	0.0566147	0.976245
Chrm4	275.326	-0.156441	0.0752965	-2.07767	0.0377399	0.976245
Ehf	2.09823	-0.0618699	0.0328693	-1.8823	0.0597954	0.976245
Fbxo3	1694.86	0.131817	0.0636618	2.07058	0.0383984	0.976245
Cd59	2145.47	0.174272	0.0820565	2.12381	0.033686	0.976245
Zfyve19	505.41	0.1447	0.0757633	1.90989	0.056147	0.976245
Jmjd7	278.829	0.158132	0.0818765	1.93135	0.0534397	0.976245
Pla2g4b	960.213	0.151026	0.0822274	1.83669	0.0662561	0.976245
Ccndbp1	1395.99	0.17402	0.0816334	2.13173	0.033029	0.976245
Polr1b	524.703	-0.14691	0.0773787	-1.89859	0.0576188	0.976245
Ubox5	491.8	-0.112336	0.0568663	-1.97544	0.0482178	0.976245
Tmx4	3914.24	0.123766	0.0654501	1.89099	0.0586254	0.976245
Btbd3	780.423	0.13022	0.0698904	1.8632	0.0624341	0.976245
Gzf1	654.737	0.124384	0.0651904	1.90801	0.0563904	0.976245
Syndig1	350.555	0.153722	0.0782485	1.96453	0.0494686	0.976245
Hck	28.0331	-0.148746	0.0783149	-1.89934	0.0575202	0.976245
Rprd1b	1344.8	-0.115248	0.060737	-1.8975	0.0577623	0.976245
Mybl2	817.953	-0.155223	0.0802275	-1.93479	0.0530163	0.976245
Elmo2	2124.29	-0.119467	0.0636947	-1.87562	0.0607075	0.976245
Zfp93	34.2051	-0.138084	0.0738134	-1.87071	0.0613848	0.976245
Bcas1	186.596	0.146999	0.0772782	1.9022	0.0571446	0.976245
Dok5	1261.06	0.136561	0.0718545	1.90052	0.0573645	0.976245
RGD1564340	2.03008	0.0705065	0.0331973	2.12386	0.0336816	0.976245
Zbtb46	222.124	-0.143746	0.0720193	-1.99593	0.0459411	0.976245
Abhd16b	2.05644	-0.0588917	0.0302546	-1.94654	0.05159	0.976245
Dnajb6	3175.23	0.115366	0.0577001	1.99941	0.045564	0.976245
Paxip1	1531.2	-0.0967957	0.0490088	-1.97507	0.0482605	0.976245
Actr3b	575.064	0.132922	0.0625019	2.12669	0.0334458	0.976245
Slc4a2	952.577	-0.133763	0.0638423	-2.09521	0.0361524	0.976245
Klhl7	4746.54	0.113029	0.0560698	2.01587	0.0438137	0.976245
Armc10	3365.11	0.102121	0.0505781	2.01908	0.0434791	0.976245
Rundc3b	1293.68	0.118276	0.0643707	1.83742	0.0661482	0.976245
Steap1	29.0126	-0.13627	0.0711235	-1.91597	0.0553693	0.976245
Gtpbp10	337.358	0.152914	0.0808809	1.8906	0.0586774	0.976245
Ccdc132	1369.44	0.0867563	0.0457841	1.8949	0.0581056	0.976245
Foxp2	1249.5	-0.115298	0.0547631	-2.1054	0.0352568	0.976245
Capza2	4891.29	0.160486	0.0785171	2.04396	0.0409574	0.976245
Ptn	8090.04	0.110501	0.0593913	1.86056	0.0628067	0.976245
Zfp398	443.51	0.118007	0.0601784	1.96095	0.0498853	0.976245
Zfp467	558.031	-0.098421	0.0528973	-1.86061	0.0627998	0.976245
Sspo	4.03379	0.0863839	0.0407279	2.121	0.0339219	0.976245
Prr15	36.6167	-0.149788	0.0736057	-2.03501	0.0418502	0.976245
Ptcd3	2004.07	0.129151	0.0693279	1.8629	0.062476	0.976245
Tcf7l1	442.673	-0.15633	0.0818961	-1.90888	0.0562778	0.976245
LOC500227	98.5798	-0.166468	0.0823894	-2.0205	0.0433316	0.976245
Atp6v1b1	4.28211	-0.0594408	0.0292163	-2.03451	0.0419004	0.976245
Dysf	169.447	-0.157829	0.0814468	-1.93782	0.0526451	0.976245
Fam136a	1699.72	0.134146	0.070751	1.89603	0.0579556	0.976245
Hmces	576.228	0.133504	0.0731204	1.8258	0.0678798	0.976245
Chchd4	317.278	0.152703	0.0818035	1.86671	0.0619426	0.976245
Camk1	1338.68	0.144988	0.0715942	2.02514	0.0428533	0.976245
Slc6a1	3279.27	-0.12764	0.0694075	-1.83899	0.0659166	0.976245
Phc1	3678.47	-0.0910678	0.048751	-1.86802	0.0617593	0.976245
Cd9	637.53	0.147875	0.0793922	1.86259	0.0625197	0.976245
Ndufa9	2266.23	0.12846	0.0668967	1.92027	0.0548243	0.976245
RGD1311164	575.053	0.127194	0.0604773	2.10317	0.0354506	0.976245
Tigar	722.289	0.132855	0.0664602	1.99901	0.045607	0.976245
Tspan9	1768.64	-0.14783	0.0743707	-1.98774	0.0468403	0.976245
Foxm1	1056.41	-0.15563	0.0819338	-1.89946	0.057504	0.976245
Gabarapl1	5429.19	0.125083	0.0606859	2.06116	0.0392877	0.976245
Etv6	142.393	-0.158692	0.0825156	-1.92318	0.0544575	0.976245
Mansc1	38.2232	-0.138032	0.0754577	-1.82926	0.0673604	0.976245
Emp1	268.693	0.174398	0.0818496	2.13071	0.033113	0.976245
Golt1b	505.54	0.1337	0.0703524	1.90043	0.0573766	0.976245
Rep15	0.969831	-0.0430658	0.0218668	-1.96946	0.0488999	0.976245
Amn1	1040.52	0.170181	0.0809508	2.10227	0.0355293	0.976245
Tmem70	564.203	0.123793	0.0661715	1.8708	0.0613733	0.976245
Sulf1	313.331	-0.152872	0.0825439	-1.85201	0.0640245	0.976245
RGD1564053	111.958	0.175739	0.0825419	2.12909	0.0332465	0.976245
Cops5	2368.01	0.148383	0.0708479	2.09439	0.0362256	0.976245
Fam110b	2312.75	0.117671	0.0640231	1.83794	0.0660713	0.976245
Car8	98.4683	0.16786	0.081806	2.05193	0.0401768	0.976245
Ndufaf6	226.25	0.13718	0.0750287	1.82837	0.0674941	0.976245
Otud6b	540.95	0.105283	0.0576587	1.82596	0.067856	0.976245
Maged2	3430.06	0.108849	0.0561174	1.93967	0.0524193	0.976245
Fut9	98.3849	0.155869	0.0821943	1.89635	0.0579138	0.976245
RGD1359108	1915.56	0.14957	0.0760765	1.96605	0.0492932	0.976245
Aqp3	15.6663	-0.0454373	0.0245585	-1.85016	0.06429	0.976245
Fam219a	1541.67	-0.112654	0.0574208	-1.9619	0.0497737	0.976245
Igfbpl1	11609.7	-0.122006	0.0625502	-1.95054	0.0511122	0.976245
Nipsnap3b	1335.99	0.110271	0.0565034	1.95158	0.0509886	0.976245
Snapc3	1275.94	0.126951	0.0659679	1.92444	0.0542993	0.976245
Cyp2j3	4.59927	-0.085864	0.0425369	-2.01858	0.0435309	0.976245
Efcab7	217.091	0.169359	0.0820734	2.0635	0.0390648	0.976245
Slc35d1	237.899	-0.141197	0.0706858	-1.99753	0.0457673	0.976245
Tmem59	3754.27	0.136669	0.064444	2.12073	0.0339442	0.976245
Faf1	1732.68	0.11006	0.0556758	1.9768	0.0480647	0.976245
Gpbp1l1	571.487	0.132588	0.0721258	1.83829	0.0660203	0.976245
Exo5	416.274	0.113162	0.0619283	1.8273	0.0676545	0.976245
Col9a2	268.074	-0.16608	0.0819659	-2.0262	0.0427439	0.976245
Rragc	1463.33	0.107057	0.0579862	1.84625	0.0648553	0.976245
Utp11l	1110.1	0.131896	0.0695287	1.897	0.0578278	0.976245
Stk40	1876.19	-0.12066	0.0599969	-2.01111	0.0443143	0.976245
Map7d1	6984.1	-0.106682	0.0569248	-1.87409	0.060918	0.976245
Trappc3	1837.03	0.124764	0.0669383	1.86386	0.0623412	0.976245
Tmem54	2.5478	-0.0652027	0.0328027	-1.98773	0.046842	0.976245
Rbbp4	2027.11	0.140937	0.0740386	1.90356	0.0569681	0.976245
Bsdc1	2181.7	-0.09072	0.0496937	-1.82558	0.0679132	0.976245
Map3k6	20.6191	-0.133753	0.0715708	-1.86883	0.0616471	0.976245
Rps6ka1	341.082	-0.132138	0.0695032	-1.90118	0.0572784	0.976245
Ldlrap1	66.0458	-0.16409	0.0821624	-1.99714	0.0458103	0.976245
Tmem50a	2493.72	0.148204	0.0756811	1.95827	0.0501978	0.976245
Htr1d	5.59985	-0.089745	0.0445929	-2.01254	0.044163	0.976245
Ubxn10	18.1874	-0.131525	0.064225	-2.04787	0.0405723	0.976245
Pla2g2c	10.1859	-0.117673	0.0628693	-1.87171	0.0612472	0.976245
Rsg1	40.4455	0.164784	0.0820672	2.00792	0.044652	0.976245
Espn	4.29969	-0.0518289	0.0279217	-1.85622	0.063422	0.976245
Ajap1	329.044	-0.132005	0.0670477	-1.96881	0.0489744	0.976245
Mmel1	8.57417	0.109212	0.0570394	1.91467	0.0555348	0.976245
Rmdn2	27.7663	0.161811	0.0791403	2.0446	0.0408941	0.976245
Kcng3	10.2238	0.122146	0.0601018	2.03231	0.0421222	0.976245
Odc1	8408.71	0.0939105	0.0468235	2.00563	0.0448958	0.976245
Nampt	1111.64	0.107994	0.0531891	2.03037	0.042319	0.976245
Brms1l	508.71	0.122368	0.0660519	1.8526	0.0639403	0.976245
Nkx2-1	503.149	-0.147643	0.0805784	-1.83229	0.0669076	0.976245
Trappc6b	1013.22	0.109261	0.0579018	1.88701	0.0591594	0.976245
Mgat2	887.901	0.12327	0.0622783	1.97934	0.0477775	0.976245
Dnaaf2	397.873	0.131437	0.0696676	1.88662	0.0592108	0.976245
L2hgdh	185.169	0.150723	0.0798762	1.88696	0.0591657	0.976245
Atl1	1543.05	0.114638	0.0586809	1.95358	0.0507508	0.976245
Jkamp	813.132	0.115669	0.0589587	1.96187	0.0497778	0.976245
Zbtb1	350.973	-0.133453	0.0717627	-1.85964	0.0629363	0.976245
Plek2	12.9326	-0.121178	0.0660767	-1.8339	0.0666682	0.976245
Ptpn21	259.98	-0.158053	0.0821792	-1.92328	0.0544454	0.976245
Tdp1	428.363	-0.1297	0.070901	-1.82931	0.0673537	0.976245
Bcl11b	7583.77	-0.125845	0.067236	-1.87169	0.0612496	0.976245
Degs2	8.36542	0.122381	0.0589162	2.07721	0.0377822	0.976245
Mir341	2.23407	-0.0709106	0.0341216	-2.07817	0.0376933	0.976245
Mir1188	3.70576	-0.0804328	0.0404582	-1.98805	0.0468064	0.976245
Cinp	981.561	0.164018	0.079328	2.06759	0.0386783	0.976245
Tnfaip2	30.9683	-0.136426	0.0746926	-1.82649	0.0677758	0.976245
Ckb	13445.4	-0.118049	0.0596567	-1.97881	0.0478375	0.976245
Wdr60	519.107	-0.116572	0.0631572	-1.84575	0.064929	0.976245
Prim1	2555.64	0.16906	0.0811786	2.08257	0.0372908	0.976245
Slc39a5	398.68	-0.14974	0.0769359	-1.9463	0.0516193	0.976245
Erbb3	61.4128	-0.137869	0.0700489	-1.96819	0.0490466	0.976245
Ankrd24	60.7146	0.151251	0.0825355	1.83256	0.0668679	0.976245
Dohh	1271.75	0.111756	0.0592234	1.88702	0.0591579	0.976245
Tjp3	110.619	-0.156075	0.0815393	-1.91411	0.0556063	0.976245
Sppl2b	1485.95	-0.128483	0.0630059	-2.03921	0.0414286	0.976245
Amh	8.15235	0.118241	0.0581403	2.03371	0.0419804	0.976245
Sf3a2	2172.77	-0.115584	0.0623648	-1.85335	0.0638329	0.976245
Adat3	214.554	-0.144796	0.072556	-1.99565	0.0459724	0.976245
Rexo1	3203.92	-0.100376	0.0523597	-1.91704	0.0552329	0.976245
Mum1	817.662	-0.128631	0.0634022	-2.02881	0.0424778	0.976245
Gpx4	5386.03	0.145878	0.0781319	1.86707	0.0618914	0.976245
Tmem259	2476.87	-0.130405	0.0638011	-2.04392	0.0409611	0.976245
Fstl3	3.89717	0.0769765	0.0418882	1.83766	0.0661119	0.976245
Rnf126	1468.46	-0.091383	0.0500524	-1.82575	0.0678887	0.976245
Gzmm	14.2388	0.121807	0.0632605	1.92549	0.0541685	0.976245
Shc2	574.761	-0.147237	0.0770619	-1.91063	0.0560515	0.976245
Vom2r53	2.02197	-0.0668698	0.0339671	-1.96866	0.048992	0.976245
Tmem263	522.273	0.140217	0.0698325	2.0079	0.0446535	0.976245
Nr1h4	1.57454	-0.054445	0.0267884	-2.03241	0.0421118	0.976245
Bbs10	393.33	0.150141	0.0769859	1.95024	0.0511478	0.976245
Slc26a10	49.5905	-0.155308	0.0808975	-1.91981	0.0548815	0.976245
Ywhaz	25667.2	0.0951674	0.048587	1.9587	0.0501477	0.976245
Samd12	52.655	0.15091	0.0823825	1.83182	0.0669781	0.976245
Gpr20	5.32955	0.0938299	0.0491088	1.91066	0.0560489	0.976245
Gli4	425.251	0.128533	0.0701991	1.83097	0.0671047	0.976245
Zc3h3	1087.98	-0.108486	0.0582617	-1.86205	0.0625966	0.976245
Eif3d	3402.8	0.136247	0.0657908	2.07091	0.0383673	0.976245
Sh3bp1	141.435	-0.156365	0.0773299	-2.02206	0.0431705	0.976245
Tmem184b	1174.8	-0.137741	0.0648991	-2.12239	0.0338051	0.976245
Mief1	829.31	-0.115602	0.0589257	-1.96182	0.0497831	0.976245
Naga	659.317	-0.112778	0.0585665	-1.92565	0.0541484	0.976245
Sult4a1	2317.05	0.144372	0.0691658	2.08733	0.0368586	0.976245
Trabd	1009.01	-0.105875	0.0572857	-1.84819	0.0645755	0.976245
Ppp6r2	3132.62	-0.075728	0.0407095	-1.86021	0.0628565	0.976245
Endou	1.24777	-0.0568728	0.0266448	-2.13448	0.0328033	0.976245
Itga5	262.786	-0.142865	0.0710942	-2.00952	0.044482	0.976245
Birc2	1064.78	0.104492	0.0542701	1.9254	0.0541795	0.976245
Yap1	473.568	-0.161796	0.0802971	-2.01497	0.0439082	0.976245
Tyk2	459.237	-0.140994	0.0664622	-2.12142	0.0338865	0.976245
Rnf26	824.968	-0.125702	0.0608157	-2.06693	0.0387412	0.976245
Tmprss5	18.9797	-0.132715	0.0629278	-2.10901	0.0349435	0.976245
LOC100125362	820.811	-0.134798	0.0710217	-1.89798	0.0576982	0.976245
Rab39a	247.976	0.155865	0.0803991	1.93865	0.0525445	0.976245
Crabp1	884.367	-0.157136	0.0815159	-1.92767	0.0538958	0.976245
Rpp25	305.996	-0.146866	0.0701537	-2.09349	0.0363053	0.976245
Smad3	505.765	-0.154112	0.0761465	-2.02389	0.0429815	0.976245
Rab11a	3796.56	0.134299	0.0645282	2.08125	0.0374111	0.976245
Lactb	306.709	0.146981	0.0693403	2.11971	0.0340307	0.976245
Fbxo9	962.299	0.139776	0.068808	2.03139	0.0422155	0.976245
Morf4l1	7139.42	0.124943	0.0657305	1.90083	0.0573243	0.976245
Adamts7	1687.09	-0.126816	0.0686735	-1.84664	0.0647986	0.976245
Spsb4	839.832	-0.112988	0.0592526	-1.90688	0.0565361	0.976245
Nudt16	528	0.1408	0.0735756	1.91368	0.0556611	0.976245
Rrp9	969.837	0.119138	0.0569696	2.09125	0.0365057	0.976245
Gnai2	9125.9	-0.114014	0.0546564	-2.08601	0.0369778	0.976245
Slc25a38	584.521	0.110715	0.0595446	1.85935	0.0629771	0.976245
Foxp4	3719.51	-0.131346	0.0653023	-2.01136	0.0442877	0.976245
Med20	907.963	0.113511	0.057737	1.96601	0.0492975	0.976245
Tfap2d	259.844	0.164688	0.0786708	2.09339	0.0363146	0.976245
RGD1305645	128.628	0.158387	0.0800791	1.97788	0.0479426	0.976245
Wdr12	852.983	0.144526	0.0723354	1.998	0.0457171	0.976245
LOC100912214	29.6571	0.156116	0.0791744	1.97181	0.0486318	0.976245
Rnpepl1	998.247	-0.101027	0.0533513	-1.89362	0.0582759	0.976245
Fam174a	411.03	0.171441	0.0812906	2.10899	0.0349451	0.976245
Fundc1	647.839	0.155309	0.0790519	1.96465	0.0494553	0.976245
Gpr34	88.9684	0.161097	0.0821964	1.9599	0.0500069	0.976245
Tsr2	426.36	0.156228	0.0735641	2.12369	0.0336958	0.976245
Gpm6b	4241.25	0.0916898	0.0470877	1.94721	0.0515093	0.976245
Glra2	946.592	0.156878	0.0799109	1.96317	0.0496267	0.976245
Syap1	644.177	0.134095	0.0725238	1.84897	0.0644616	0.976245
Mbtps2	500.585	0.128498	0.0694867	1.84925	0.0644223	0.976245
Sms	4468.79	0.141886	0.077555	1.82948	0.0673274	0.976245
Yipf6	785.651	0.147696	0.0764853	1.93104	0.0534787	0.976245
Igbp1	1254.47	0.144745	0.0759587	1.90558	0.0567047	0.976245
Tsc22d3	1757.51	0.162482	0.0788259	2.06128	0.0392765	0.976245
Tmem164	1153.17	-0.13668	0.0702787	-1.94483	0.0517956	0.976245
Wdr44	404.477	0.122702	0.0620404	1.97778	0.0479534	0.976245
Pgrmc1	5121.32	0.145379	0.0750127	1.93806	0.0526153	0.976245
Rab33a	1013.38	0.140918	0.0754481	1.86774	0.061798	0.976245
Hs6st2	1381.16	0.150313	0.0797307	1.88526	0.0593948	0.976245
Gabra3	507.295	0.134503	0.0733269	1.83429	0.0666107	0.976245
Renbp	49.3917	-0.163012	0.0824539	-1.97701	0.0480406	0.976245
Fhl1	2431.92	-0.0999604	0.0471529	-2.11992	0.034013	0.976245
Tpd52l1	97.6806	0.144745	0.0794153	1.82263	0.0683587	0.976482
Ipo7	4090.2	0.112058	0.0614882	1.82243	0.0683895	0.976482
Dcun1d2	5.49446	0.0846925	0.0464522	1.82322	0.0682702	0.976482
Mt3	817.005	0.146413	0.0803726	1.82168	0.0685032	0.977179
Rabl3	241.097	0.145726	0.080016	1.82121	0.068575	0.977274
Arpc1a	4065.86	0.125441	0.0689422	1.81951	0.0688342	0.98004
Trub2	1150.85	0.14151	0.077801	1.81888	0.0689301	0.980477
Mir22	21.2923	0.13287	0.0730927	1.81783	0.0690904	0.9805
Htr4	7.63633	-0.101949	0.0561109	-1.81691	0.0692307	0.9805
Decr1	301.006	0.142214	0.0782133	1.81828	0.0690212	0.9805
Aldh4a1	458.796	-0.110968	0.061065	-1.81722	0.0691838	0.9805
Lrg1	2.54054	0.062415	0.0343556	1.81673	0.0692578	0.9805
Bbs7	196.313	-0.127117	0.0700637	-1.81431	0.0696298	0.983003
Nfkb1	407.798	-0.122921	0.0677509	-1.81431	0.0696307	0.983003
Fblim1	142.793	-0.149768	0.0825354	-1.81458	0.0695877	0.983003
Cdc25b	1387.23	-0.146953	0.0810178	-1.81384	0.0697027	0.983096
Plrg1	1645.34	0.105337	0.0581034	1.81292	0.0698447	0.984175
Cdca5	118.995	-0.149468	0.0824957	-1.81183	0.070012	0.984632
Tbc1d9b	1857.44	-0.0980843	0.054169	-1.81071	0.0701861	0.984632
Timm23	1689.84	0.135228	0.0746874	1.81059	0.0702045	0.984632
Rab7a	5368.39	0.0827977	0.0457168	1.8111	0.0701256	0.984632
Rwdd2a	34.8546	0.143015	0.0789203	1.81214	0.0699649	0.984632
Vom2r2	0.0837976	-0.00133354	0.0087204	-0.152922	0.87846	0.987053
Raet1l	0.784392	-0.0257128	0.0202628	-1.26896	0.204454	0.987053
Rrlt	0.490401	0.00812936	0.0160027	0.508	0.611453	0.987053
Lrp11	1956.18	-0.0580794	0.0685373	-0.847414	0.396765	0.987053
Nup43	616.844	0.0735967	0.0728665	1.01002	0.312485	0.987053
Lats1	2452.82	-0.0259904	0.0653426	-0.397757	0.69081	0.987053
Katna1	531.675	0.130629	0.0774775	1.68602	0.0917923	0.987053
Tab2	2816.31	-0.0608312	0.0495589	-1.22745	0.219653	0.987053
Samd5	67.5576	-0.0483197	0.0820029	-0.589244	0.555697	0.987053
Stxbp5	611.377	-0.0537378	0.0646686	-0.830973	0.405989	0.987053
Grm1	236.575	-0.0461602	0.0816932	-0.565044	0.572044	0.987053
Shprh	1911.73	0.0246816	0.0731241	0.337531	0.735717	0.987053
Fbxo30	733.5	0.0497824	0.0684793	0.72697	0.467244	0.987053
Epm2a	21.1105	0.123415	0.0729914	1.69082	0.0908716	0.987053
Utrn	481.45	-0.0152882	0.0786041	-0.194496	0.845787	0.987053
Stx11	12.019	-0.0413221	0.0648639	-0.637058	0.524087	0.987053
Sf3b5	2932.08	0.10257	0.0824489	1.24404	0.213484	0.987053
Plagl1	954.867	0.0291926	0.0790216	0.369425	0.711811	0.987053
Zc2hc1b	0.154052	-0.00267913	0.0087204	-0.307226	0.758672	0.987053
Ltv1	674.122	0.0964689	0.0681215	1.41613	0.156737	0.987053
Phactr2	122.366	-0.100375	0.0774107	-1.29665	0.19475	0.987053
Adat2	135.285	0.0596233	0.0776449	0.767897	0.442548	0.987053
Aig1	699.298	0.0576463	0.0668839	0.861887	0.38875	0.987053
Hivep2	3664.72	0.067144	0.0813743	0.825126	0.4093	0.987053
Vta1	1990.98	0.0613704	0.0466845	1.31458	0.188652	0.987053
Gje1	0.890651	-0.00398432	0.0212048	-0.187897	0.850957	0.987053
Nmbr	15.6809	-0.0166325	0.0624926	-0.266152	0.790122	0.987053
Cited2	3364.11	0.0471762	0.0560884	0.841104	0.40029	0.987053
Txlnb	68.1222	0.0875162	0.0825373	1.06032	0.288998	0.987053
Heca	1248.59	0.0311441	0.0594631	0.523755	0.600449	0.987053
Abracl	1204.29	0.109497	0.0749944	1.46007	0.14427	0.987053
Reps1	1156.47	-0.0686896	0.06018	-1.1414	0.253702	0.987053
Ccdc28a	103.844	0.0690544	0.0821733	0.840351	0.400711	0.987053
Hebp2	49.4738	0.140816	0.0797531	1.76566	0.0774537	0.987053
Perp	51.5902	-0.0234216	0.0824628	-0.284027	0.77639	0.987053
Coil	605.3	0.102538	0.0587007	1.7468	0.0806722	0.987053
Il1r2	4.10537	0.0726423	0.0466242	1.55804	0.119225	0.987053
Slc35d3	36.6975	-0.0820713	0.0760788	-1.07877	0.280691	0.987053
Map7	151.182	-0.0232568	0.0776628	-0.299459	0.76459	0.987053
Mtfr2	287.755	-0.0765753	0.0790533	-0.968654	0.332718	0.987053
Pde7b	95.6163	-0.138308	0.0825283	-1.67588	0.0937611	0.987053
Ahi1	1637.64	-0.0580394	0.0695993	-0.833908	0.404333	0.987053
Hbs1l	2104.16	0.0367974	0.0515951	0.713196	0.475725	0.987053
Aldh8a1	3.91713	0.0452227	0.0420753	1.0748	0.282463	0.987053
Ptprk	1466.99	0.0322853	0.0825198	0.391243	0.695618	0.987053
Arhgap18	468.104	-0.0559249	0.0813702	-0.68729	0.4919	0.987053
Samd3	13.2011	0.0419266	0.055113	0.76074	0.446813	0.987053
Tmem200a	414.666	-0.0596188	0.06626	-0.89977	0.368242	0.987053
Ccnb2	721.406	-0.0266074	0.0825313	-0.322392	0.747156	0.987053
Med23	1874.55	-0.069221	0.0557243	-1.24221	0.214161	0.987053
Enpp3	52.2218	-0.0227042	0.0814406	-0.278782	0.780412	0.987053
Enpp1	31.9241	-0.0403101	0.0812471	-0.496142	0.619794	0.987053
Ctgf	215.187	0.122209	0.0806238	1.51579	0.129572	0.987053
Taar9	0.0740234	-0.00133354	0.0087204	-0.152922	0.87846	0.987053
Taar7b	0.376591	-0.00890207	0.0100471	-0.886033	0.3756	0.987053
Taar7a	0.27061	-0.00402472	0.0087204	-0.461529	0.644419	0.987053
Taar6	0.189408	-0.00267913	0.0087204	-0.307226	0.758672	0.987053
Taar5	0.164227	-0.00267913	0.0087204	-0.307226	0.758672	0.987053
Taar1	0.0911228	0.00135763	0.0087204	0.155685	0.876282	0.987053
Vnn1	4.53277	0.056258	0.0440424	1.27736	0.201475	0.987053
Vnn3	0.699078	-0.00987511	0.0182214	-0.541952	0.587852	0.987053
LOC100910237	75.5166	0.0620187	0.0760649	0.815339	0.414878	0.987053
Rps12	16809.4	0.0381006	0.0810213	0.470254	0.638173	0.987053
Eya4	56.175	-0.0810244	0.0802388	-1.00979	0.312596	0.987053
Tcf21	3.6349	0.0247769	0.0420457	0.589287	0.555669	0.987053
Tbpl1	1987.51	0.0437243	0.078055	0.560173	0.575361	0.987053
Slc2a12	200.187	0.104326	0.0818263	1.27497	0.202321	0.987053
Sgk1	471.623	0.0525378	0.075141	0.69919	0.484433	0.987053
Clvs2	87.8108	0.0478544	0.0822083	0.582111	0.560492	0.987053
Rnf217	568.126	-0.0109961	0.0635743	-0.172965	0.862679	0.987053
Hddc2	195.996	0.0609369	0.0817451	0.74545	0.456	0.987053
Hey2	131.344	-0.0856769	0.0817556	-1.04796	0.294655	0.987053
Hint3	205.897	0.0342444	0.0824227	0.415473	0.677795	0.987053
Trmt11	113.849	-0.0453148	0.0812648	-0.557619	0.577105	0.987053
Cenpw	308.361	-0.0162032	0.0814968	-0.19882	0.842403	0.987053
Rspo3	251.637	0.106788	0.0756548	1.41152	0.158093	0.987053
Kiaa0408	5672.6	-0.0230811	0.0761908	-0.302938	0.761937	0.987053
Lrrc14b	116.794	-0.100147	0.0800199	-1.25152	0.210743	0.987053
Ccdc127	406.636	0.0787704	0.063016	1.25001	0.211298	0.987053
Sdha	2293.7	-0.0320493	0.0660413	-0.485291	0.62747	0.987053
Pdcd6	1345.97	0.101282	0.0778029	1.30177	0.192994	0.987053
Ahrr	3.72088	-0.0371137	0.0403635	-0.919487	0.357841	0.987053
Exoc3	1894.07	0.0343003	0.0597117	0.574431	0.565676	0.987053
Slc9a3	4.16025	-0.033533	0.0330321	-1.01516	0.310027	0.987053
Tppp	78.6347	0.0644032	0.0825084	0.780566	0.435058	0.987053
Zdhhc11	2.57547	-0.0365589	0.0328199	-1.11392	0.265312	0.987053
Brd9	1532.31	0.0387847	0.0443122	0.875261	0.381432	0.987053
Trip13	334.346	0.0316737	0.0803909	0.393996	0.693584	0.987053
Nkd2	569.467	0.0554263	0.0775739	0.714496	0.47492	0.987053
Slc12a7	1109.44	-0.104727	0.0685385	-1.528	0.126512	0.987053
Tert	118.208	-0.0230555	0.0779015	-0.295957	0.767263	0.987053
Clptm1l	2612.2	-0.0479757	0.0421963	-1.13696	0.255553	0.987053
Slc6a3	1.11397	0.00893623	0.0191837	0.465825	0.641341	0.987053
Lpcat1	2668.04	-0.0843118	0.0541887	-1.55589	0.119734	0.987053
Irx1	14.4419	-0.0278983	0.0697166	-0.400168	0.689033	0.987053
Med10	1030.41	0.0455488	0.0754915	0.603363	0.546267	0.987053
Nsun2	1825.78	0.0897687	0.0519193	1.729	0.0838085	0.987053
Srd5a1	299.579	-0.100315	0.0666726	-1.50459	0.13243	0.987053
Papd7	2274.09	-0.0357209	0.0567019	-0.629976	0.52871	0.987053
Adcy2	444.659	-0.068354	0.0805696	-0.848384	0.396224	0.987053
Fastkd3	728.416	-0.0182405	0.0601281	-0.30336	0.761616	0.987053
Mtrr	318.596	0.0198937	0.0773179	0.257298	0.796949	0.987053
LOC680200	87.9084	-0.0836074	0.0819029	-1.02081	0.307344	0.987053
Ppp1r14c	573.956	0.122278	0.0804601	1.51973	0.128579	0.987053
Iyd	0.713597	0.0133707	0.0191923	0.69667	0.48601	0.987053
Plekhg1	169.734	-0.0761355	0.0819579	-0.928958	0.352911	0.987053
Mthfd1l	289.315	-0.0543514	0.0815992	-0.666077	0.505362	0.987053
Akap12	1329.95	-0.0363243	0.0825331	-0.440118	0.659852	0.987053
Zbtb2	560.866	0.0431412	0.0659767	0.653886	0.513185	0.987053
Armt1	425.892	0.0225971	0.0802396	0.28162	0.778235	0.987053
Esr1	2.20905	0.0140374	0.0256904	0.546406	0.584787	0.987053
Myct1	15.8915	-0.0493305	0.0672887	-0.733117	0.463487	0.987053
Vip	1.10024	0.0159163	0.0252405	0.630586	0.528311	0.987053
Fbxo5	400.293	-0.0529857	0.0819617	-0.646469	0.517976	0.987053
Mtrf1l	265.476	0.0631447	0.0767328	0.822917	0.410555	0.987053
Rgs17	319.148	-0.016423	0.0744445	-0.220608	0.825398	0.987053
Oprm1	77.7666	-0.0256357	0.0819049	-0.312994	0.754286	0.987053
Ipcef1	76.8364	0.0594617	0.0798894	0.7443	0.456695	0.987053
Scaf8	3063.99	-0.0408144	0.061786	-0.660576	0.508884	0.987053
Tfb1m	597.499	0.0303654	0.0704668	0.430918	0.666528	0.987053
Cldn20	1.11249	0.0329596	0.0234804	1.40371	0.160406	0.987053
Nox3	1.57582	0.0131571	0.0249628	0.527069	0.598145	0.987053
Ldhal6b	1.6487	0.0184467	0.0278766	0.661729	0.508145	0.987053
Zdhhc14	419.192	-0.0241919	0.0704114	-0.343579	0.731163	0.987053
Gtf2h5	2293.64	0.0666102	0.0805036	0.827419	0.408	0.987053
Tmem181	535.143	0.0789083	0.0763359	1.0337	0.301277	0.987053
Dynlt1	4264.2	0.0831875	0.0804383	1.03418	0.301053	0.987053
Ezr	3629.52	-0.0396496	0.0780728	-0.507854	0.611556	0.987053
Tagap	13.778	-0.0995772	0.0636063	-1.56552	0.11746	0.987053
Fndc1	18.0864	0.0278387	0.0579642	0.480273	0.631033	0.987053
Sod2	895.922	-0.0177849	0.077092	-0.230697	0.81755	0.987053
Wtap	3955.32	0.0987886	0.0607162	1.62706	0.103725	0.987053
Acat2	1879.81	0.0889126	0.0533157	1.66766	0.0953825	0.987053
Tcp1	4734.51	0.0483379	0.0553966	0.872578	0.382893	0.987053
Mrpl18	999.765	0.0750617	0.0824549	0.910336	0.362645	0.987053
Pnldc1	52.189	0.0280865	0.0780481	0.359862	0.718951	0.987053
Igf2r	1803.15	-0.0182949	0.080433	-0.227455	0.82007	0.987053
Slc22a1	0.0686363	0.00135763	0.0087204	0.155685	0.876282	0.987053
Slc22a2	20.5393	-0.0285991	0.061259	-0.466856	0.640603	0.987053
Plg	4.15969	-0.0759596	0.0434129	-1.7497	0.0801697	0.987053
Map3k4	1060.68	-0.0595702	0.066165	-0.900328	0.367946	0.987053
Agpat4	976.189	0.0104994	0.0545114	0.192609	0.847265	0.987053
Pacrg	75.9683	-0.0875479	0.0810887	-1.07966	0.280295	0.987053
Qk	735.604	-0.0359286	0.0772178	-0.46529	0.641724	0.987053
Pabpc6	2.61927	0.0193208	0.0333828	0.578764	0.562748	0.987053
T	3.18357	-0.0548726	0.0324431	-1.69135	0.0907701	0.987053
T2	10.7831	0.0177959	0.0549444	0.32389	0.746021	0.987053
Sft2d1	759.648	0.0205944	0.0619362	0.33251	0.739504	0.987053
Mpc1	2314.03	0.084163	0.0821631	1.02434	0.305674	0.987053
Ccr6	0.0911228	0.00135763	0.0087204	0.155685	0.876282	0.987053
LOC683722	288.454	0.128899	0.0780899	1.65065	0.0988096	0.987053
Rps6ka2	1387.54	-0.0565775	0.0625523	-0.904483	0.365739	0.987053
Gpr31	0.279611	-0.00476035	0.00948149	-0.502067	0.61562	0.987053
Tcp10b	0.499461	0.00903298	0.0159063	0.567886	0.570112	0.987053
Ttll2	0.572304	-0.016926	0.0188418	-0.898325	0.369012	0.987053
Mllt4	3989.53	-0.015277	0.0785033	-0.194603	0.845704	0.987053
Smoc2	38.9505	-0.0121774	0.0609077	-0.199932	0.841534	0.987053
Thbs2	105.331	0.0387635	0.0784291	0.494249	0.62113	0.987053
LOC100125364	588.581	0.0643921	0.064117	1.00429	0.315238	0.987053
Fam120b	1906.4	0.0353837	0.0651389	0.543204	0.58699	0.987053
Psmb1	5776.69	0.119712	0.0820645	1.45875	0.144634	0.987053
Tbp	852.166	0.0808138	0.0739618	1.09264	0.27455	0.987053
Pdcd2	610.485	0.100243	0.0787218	1.27339	0.20288	0.987053
Prdm9	11.0668	-0.0398577	0.0574544	-0.693727	0.487853	0.987053
Chd1	1456.71	-0.0346922	0.064574	-0.537247	0.591097	0.987053
Riok2	623.614	0.133305	0.074133	1.79819	0.0721476	0.987053
Lix1	711.693	0.0992307	0.0779694	1.27269	0.203129	0.987053
Lnpep	166.727	-0.0263573	0.0810166	-0.325332	0.74493	0.987053
Mir99b	0.264971	0.00159375	0.00944604	0.168722	0.866016	0.987053
Mir125a	0.419885	0.00270508	0.0122349	0.221095	0.825018	0.987053
LOC688452	147.333	-0.0637826	0.0821985	-0.775957	0.437774	0.987053
Fpr1	0.666501	-0.00542871	0.0147631	-0.367723	0.71308	0.987053
Ppp2r1a	10984.8	-0.0426515	0.060174	-0.708803	0.478447	0.987053
Vom1r19	0.0828832	0.00135763	0.0087204	0.155685	0.876282	0.987053
Zfp51	23.4084	0.0942777	0.0698998	1.34875	0.177416	0.987053
Zfp52	118.052	-0.0884201	0.0822451	-1.07508	0.282338	0.987053
Vom2r80	13.1826	0.04242	0.0663341	0.63949	0.522504	0.987053
Zfp40	1187.01	0.129232	0.0781468	1.65371	0.0981857	0.987053
Vom2r15	0.0838848	0.00135763	0.0087204	0.155685	0.876282	0.987053
Vom2r16	3.54344	-0.0479826	0.040477	-1.18543	0.235848	0.987053
Il6	0.702661	0.0298125	0.0192364	1.5498	0.121189	0.987053
Il12rb2	519.597	-0.12035	0.0818251	-1.47082	0.14134	0.987053
Rps9	250.09	0.0452528	0.082542	0.548239	0.583528	0.987053
Tsen34	97.4032	-0.0865581	0.0735807	-1.17637	0.239447	0.987053
Mboat7	23.6336	-0.102736	0.0754189	-1.36221	0.173133	0.987053
Tmc4	8.82593	-0.0463671	0.044317	-1.04626	0.295441	0.987053
Cnot3	2101.45	-0.100893	0.061415	-1.6428	0.100424	0.987053
Prpf31	1208.68	-0.0126265	0.0636169	-0.198477	0.842672	0.987053
Tfpt	527.9	0.0701981	0.0777856	0.902456	0.366815	0.987053
Oscar	6.88728	-0.019642	0.0505674	-0.388431	0.697697	0.987053
Cacng6	1.72992	-0.00543493	0.028936	-0.187826	0.851013	0.987053
Cacng8	572.511	-0.0613072	0.0760951	-0.805666	0.420436	0.987053
Cacng7	1549.07	-0.0565168	0.0501284	-1.12744	0.259556	0.987053
Prkcg	613.021	-0.0179754	0.0824749	-0.21795	0.827468	0.987053
Myadm	530.179	-0.0834717	0.0801602	-1.04131	0.297731	0.987053
Olr1l	0.46124	-0.00684304	0.0102946	-0.664719	0.50623	0.987053
Nlrp12	0.251654	0.0040488	0.0087204	0.464291	0.642439	0.987053
Vom2r27	0.0838848	0.00135763	0.0087204	0.155685	0.876282	0.987053
Vom2r17	3.39033	-0.0211567	0.0306687	-0.689848	0.490289	0.987053
Vom2r19	0.935594	0.0142908	0.0217604	0.656733	0.511352	0.987053
Mzf1	714.593	0.0584659	0.0781666	0.747966	0.454481	0.987053
Ube2m	4200.46	-0.0566105	0.0433847	-1.30485	0.191943	0.987053
Chmp2a	2213.76	0.125298	0.0765783	1.6362	0.101797	0.987053
Trim28	10337.3	-0.0742376	0.0621385	-1.19471	0.2322	0.987053
Zbtb45	1046.29	-0.0520216	0.0690945	-0.752906	0.451507	0.987053
Slc27a5	3.7027	0.0312855	0.0397076	0.787896	0.430757	0.987053
Rnf225	8.07735	-0.0449237	0.0549372	-0.817729	0.413512	0.987053
Rps5	11104.8	0.0353342	0.0793973	0.44503	0.656298	0.987053
Zfp110	855.568	-0.0589763	0.0500641	-1.17802	0.238791	0.987053
Zfp329	1451.75	0.0210034	0.0556848	0.377183	0.706038	0.987053
Vom2r33	0.0828832	0.00135763	0.0087204	0.155685	0.876282	0.987053
Vom2r34	0.0804969	-0.00133354	0.0087204	-0.152922	0.87846	0.987053
Sbk1	514.145	-0.099198	0.0701975	-1.41313	0.157618	0.987053
Vom1r27	0.0838848	0.00135763	0.0087204	0.155685	0.876282	0.987053
Zfp418	75.8985	-0.022032	0.0820955	-0.268371	0.788414	0.987053
Zfp978	119.819	-0.0312711	0.0820468	-0.381138	0.703101	0.987053
Hiat1	128.763	0.101762	0.0805878	1.26274	0.206681	0.987053
Zfp772	685.513	0.129757	0.0788475	1.64567	0.099832	0.987053
Aurkc	287.989	-0.0172094	0.0798341	-0.215564	0.829327	0.987053
Usp29	3431.72	0.0523444	0.0611371	0.856179	0.391899	0.987053
Mir3099	0.22207	-0.00402472	0.0087204	-0.461529	0.644419	0.987053
Peg3	4963.57	-0.0513566	0.0765258	-0.671103	0.502155	0.987053
Zim1	108.913	0.0598235	0.0824985	0.725146	0.468362	0.987053
Olr7	0.0804969	-0.00133354	0.0087204	-0.152922	0.87846	0.987053
Smim17	103.012	0.0799601	0.0799864	0.999671	0.31747	0.987053
Zfp667	502.855	0.0555867	0.0641554	0.866438	0.38625	0.987053
Galp	0.0837976	-0.00133354	0.0087204	-0.152922	0.87846	0.987053
Zfp444	1330.11	-0.00918301	0.055268	-0.166154	0.868035	0.987053
Nlrp5	0.761248	0.00537106	0.0199329	0.269458	0.787578	0.987053
Vom1r38	0.0992044	-0.00133354	0.0087204	-0.152922	0.87846	0.987053
Rasl2-9	27.318	0.107232	0.0693104	1.54712	0.121834	0.987053
Rfpl4a	0.328973	-0.00664349	0.0137036	-0.484799	0.627819	0.987053
Epn1	5508.9	-0.0546989	0.0585509	-0.934212	0.350195	0.987053
Zfp865	395.809	0.0396139	0.0569195	0.695964	0.486451	0.987053
Zfp524	231.5	0.0338278	0.0650936	0.519679	0.603287	0.987053
Fiz1	1321.2	-0.0718078	0.0583318	-1.23102	0.218314	0.987053
Sbk2	1.15184	0.00862943	0.0221083	0.390325	0.696296	0.987053
Ssc5d	72.4461	-0.0398411	0.0824766	-0.483059	0.629054	0.987053
Nat14	458.06	0.0192301	0.074127	0.259421	0.795311	0.987053
Isoc2b	86.5883	0.124003	0.0825437	1.50227	0.133028	0.987053
Shisa7	2219.1	-0.0620867	0.0795935	-0.780047	0.435363	0.987053
Ube2s	5662.85	-0.0256318	0.0653504	-0.392221	0.694895	0.987053
Rpl28	11781.3	0.0301621	0.0812747	0.371113	0.710554	0.987053
Suv420h2	1604.33	-0.114556	0.0660286	-1.73494	0.0827506	0.987053
Tmem150b	463.3	-0.113278	0.0700319	-1.61752	0.105766	0.987053
Brsk1	7495.32	-0.0434865	0.0604796	-0.719027	0.472124	0.987053
Hspbp1	1739.31	0.0144109	0.0583483	0.246981	0.804923	0.987053
Tmem86b	68.6071	-0.120472	0.080648	-1.49379	0.135229	0.987053
Ptprh	49.7946	-0.0616431	0.0732731	-0.841279	0.400192	0.987053
Tnni3	23.2154	0.0500158	0.0638416	0.783436	0.433371	0.987053
Tnnt1	12.0862	-0.0329638	0.0532088	-0.619518	0.535575	0.987053
Ppp1r12c	2395	-0.0858858	0.0577098	-1.48824	0.136688	0.987053
Ncr1	0.165766	0.00270322	0.0087204	0.309988	0.75657	0.987053
Vill	6.41546	-0.0680968	0.047052	-1.44726	0.147823	0.987053
Lilrb3	1.63	-0.0390207	0.0271109	-1.4393	0.150066	0.987053
Leng8	6890.68	-0.0907403	0.0693051	-1.30929	0.190437	0.987053
Ttyh1	3256.46	-0.088861	0.068463	-1.29794	0.194307	0.987053
Lair1	6.96504	0.0362213	0.0491548	0.736883	0.461194	0.987053
Lig1	2116.93	-0.072947	0.074483	-0.979378	0.327393	0.987053
Pla2g4c	0.0874359	0.00135763	0.0087204	0.155685	0.876282	0.987053
Crx	0.689019	0.00678341	0.0109911	0.617171	0.537122	0.987053
Rpl9	17418.2	0.0230621	0.0810352	0.284593	0.775956	0.987053
Gltscr2	2868.84	0.0962527	0.0631934	1.52315	0.127722	0.987053
Ehd2	87.1936	-0.0140086	0.0823099	-0.170194	0.864858	0.987053
Gltscr1	3138.04	-0.0937511	0.0695379	-1.3482	0.177594	0.987053
Napa	1892.38	-0.0525088	0.0444901	-1.18023	0.237907	0.987053
Slc8a2	560.644	-0.0197557	0.080248	-0.246183	0.805541	0.987053
Meis3	1858.1	-0.0522864	0.0715737	-0.730525	0.465069	0.987053
C5ar2	7.31573	-0.010404	0.0543301	-0.191496	0.848137	0.987053
C5ar1	9.75619	-0.0114805	0.0582425	-0.197116	0.843737	0.987053
Sae1	3221.89	-0.0778711	0.054906	-1.41826	0.156114	0.987053
Tmem160	485.212	0.133504	0.0795597	1.67803	0.093341	0.987053
Npas1	423.322	-0.0244996	0.0818213	-0.299428	0.764614	0.987053
Arhgap35	8550.56	-0.0180026	0.0730758	-0.246355	0.805408	0.987053
Ceacam9	2.98368	0.0655165	0.0394236	1.66186	0.0965409	0.987053
Ap2s1	4337.92	0.12506	0.0777766	1.60794	0.107849	0.987053
Slc1a5	147.683	-0.0908479	0.0820025	-1.10787	0.267919	0.987053
Strn4	6254.71	-0.0744795	0.0414567	-1.79656	0.0724055	0.987053
Prkd2	240.119	-0.13328	0.0737362	-1.80753	0.0706801	0.987053
Dact3	1295.64	-0.066684	0.066743	-0.999116	0.317738	0.987053
Gng8	52.981	-0.0222107	0.0739911	-0.30018	0.76404	0.987053
Ptgir	3.15996	0.047495	0.0371508	1.27844	0.201096	0.987053
Calm3	10159.7	0.0150926	0.0479304	0.314886	0.752848	0.987053
Pnmal2	3920.07	-0.050334	0.0821686	-0.61257	0.540161	0.987053
Ccdc8	450.923	-0.0560863	0.0749405	-0.748411	0.454212	0.987053
Ppp5c	2223.46	0.0515422	0.0454678	1.1336	0.256964	0.987053
Il16	71.6114	-0.116979	0.082311	-1.42119	0.155263	0.987053
Pglyrp1	33.3668	0.0547148	0.0629611	0.869025	0.384833	0.987053
Nanos2	2.32358	-0.0150038	0.0345549	-0.434202	0.664142	0.987053
Mypop	244.259	-0.0970986	0.0784721	-1.23736	0.215952	0.987053
Irf2bp1	1875.95	-0.0879732	0.0717578	-1.22597	0.220209	0.987053
Foxa3	1.20968	-0.0125507	0.0253833	-0.494449	0.620989	0.987053
Sympk	2198.33	-0.117627	0.0712796	-1.65021	0.098899	0.987053
Fbxo46	839.242	-0.0150942	0.055533	-0.271805	0.785772	0.987053
Qpctl	1028.4	-0.0880116	0.053399	-1.64819	0.0993142	0.987053
Gipr	1377.88	0.047402	0.0805777	0.588277	0.556346	0.987053
Mir330	0.25443	-0.00459085	0.00931171	-0.493019	0.621999	0.987053
Gpr4	72.4986	-0.0980375	0.0825352	-1.18783	0.234901	0.987053
Ppm1n	21.2717	-0.0659531	0.0645768	-1.02131	0.307106	0.987053
Rtn2	4585.94	0.0214928	0.0523066	0.4109	0.681146	0.987053
Ercc1	571.11	-0.0216204	0.0584528	-0.369878	0.711473	0.987053
Cd3eap	316.535	0.0638151	0.0700525	0.910961	0.362316	0.987053
Mir343	2.57407	0.025588	0.0376054	0.680434	0.49623	0.987053
Klc3	13.6232	-0.0618663	0.0646118	-0.957509	0.338311	0.987053
Mark4	3357.39	-0.0763624	0.0636506	-1.19971	0.230251	0.987053
Trappc6a	154.981	-0.140946	0.0822677	-1.71326	0.086664	0.987053
Ppp1r37	2913.94	-0.0430382	0.0450135	-0.956117	0.339013	0.987053
Gemin7	202.123	0.0869033	0.0824099	1.05453	0.291643	0.987053
Clasrp	1810.35	-0.0508942	0.0729195	-0.69795	0.485208	0.987053
Clptm1	2842.8	-0.0798332	0.0545919	-1.46236	0.143642	0.987053
Apoc2	3.00626	-0.0167516	0.0358223	-0.46763	0.640049	0.987053
Apoc4	9.0793	-0.0321779	0.0572725	-0.561838	0.574226	0.987053
Apoc1	15.9007	0.0226816	0.0609541	0.37211	0.709811	0.987053
Apoe	2570.88	-0.0567049	0.0822869	-0.689112	0.490753	0.987053
Tomm40	1499.61	-0.0458855	0.0508189	-0.902922	0.366567	0.987053
Pvrl2	770.955	-0.0650847	0.0675217	-0.963906	0.335093	0.987053
Bcam	430.47	-0.084607	0.0822756	-1.02834	0.303791	0.987053
Cblc	1.71439	0.00523994	0.0199221	0.263022	0.792533	0.987053
Ceacam16	5.13966	0.0515391	0.0431511	1.19439	0.232327	0.987053
Ceacam19	0.0828832	0.00135763	0.0087204	0.155685	0.876282	0.987053
PVR	89.5386	0.0848616	0.0811392	1.04588	0.295618	0.987053
Ceacam20	0.17544	0.00270322	0.0087204	0.309988	0.75657	0.987053
Zfp180	2813.39	-0.0306677	0.0546075	-0.561602	0.574387	0.987053
Zfp112	205.045	-0.0850872	0.0754307	-1.12802	0.259312	0.987053
Zfp111	318.28	0.0173029	0.0720537	0.240138	0.810223	0.987053
Zfp61	991.126	-0.0735763	0.0684074	-1.07556	0.282124	0.987053
Tescl	0.0992044	-0.00133354	0.0087204	-0.152922	0.87846	0.987053
Lypd5	15.3104	0.0103747	0.0655085	0.158372	0.874164	0.987053
Kcnn4	20.3911	-0.097981	0.0678247	-1.44462	0.148564	0.987053
Smg9	726	-0.112736	0.0662311	-1.70216	0.0887249	0.987053
Irgc	0.567482	0.0149792	0.0178382	0.839723	0.401064	0.987053
Plaur	6.49875	0.0184496	0.0437184	0.422009	0.673019	0.987053
Cadm4	6981.01	-0.0186218	0.0579568	-0.321305	0.747979	0.987053
Zfp428	2482.56	0.016419	0.0604697	0.271525	0.785988	0.987053
Irgq	5304.05	-0.0235608	0.0807682	-0.291708	0.77051	0.987053
Pinlyp	2.26128	-0.0271943	0.0290783	-0.93521	0.34968	0.987053
Xrcc1	2087.61	-0.0630636	0.0483075	-1.30546	0.191736	0.987053
Zfp575	998.968	-0.109931	0.0757984	-1.45031	0.146972	0.987053
Ethe1	171.723	-0.0325024	0.0811884	-0.400333	0.688911	0.987053
Phldb3	20.747	-0.126547	0.0727095	-1.74044	0.0817814	0.987053
Tex101	0.599613	0.0171166	0.0150676	1.13599	0.255963	0.987053
Rps19	257.307	-0.0367088	0.081806	-0.44873	0.653627	0.987053
Arhgef1	2341.9	-0.0279374	0.067813	-0.411977	0.680356	0.987053
Rabac1	1567.66	0.0224113	0.0673366	0.332825	0.739267	0.987053
Atp1a3	8221.93	-0.0566638	0.0824735	-0.687054	0.492049	0.987053
Grik5	4382.18	-0.11538	0.0695519	-1.65891	0.0971347	0.987053
Zfp574	1039.09	-0.0609939	0.0657403	-0.9278	0.353512	0.987053
Pou2f2	207.244	-0.126037	0.0721531	-1.74679	0.0806733	0.987053
Gsk3a	4696.02	-0.0712256	0.0455036	-1.56527	0.117519	0.987053
Erf	791.053	-0.0307134	0.0555582	-0.552815	0.58039	0.987053
Pafah1b3	3636.12	0.107	0.0704194	1.51947	0.128644	0.987053
Megf8	4246.73	-0.124376	0.0712917	-1.7446	0.0810539	0.987053
Cnfn	0.0735555	-0.00133354	0.0087204	-0.152922	0.87846	0.987053
Cxcl17	12.3696	0.0171461	0.0656825	0.261045	0.794058	0.987053
Erich4	1.90177	-0.0122292	0.0246321	-0.496475	0.619559	0.987053
Atp5sl	579.806	0.0837515	0.074065	1.13078	0.258146	0.987053
B3gnt8	6.55025	-0.0205997	0.0417115	-0.493863	0.621403	0.987053
Bckdha	1215.43	0.0473331	0.0624405	0.758051	0.448421	0.987053
Exosc5	407.347	-0.0319539	0.0614546	-0.51996	0.603092	0.987053
B9d2	413.33	0.0329916	0.0755001	0.436974	0.66213	0.987053
Ccdc97	1435.71	-0.0529606	0.050966	-1.03913	0.298742	0.987053
Hnrnpul1	7645.09	-0.0952676	0.0604212	-1.57672	0.114859	0.987053
Axl	327.407	-0.0624599	0.0740779	-0.843166	0.399136	0.987053
Cd177	1.54298	-0.0330526	0.0198484	-1.66526	0.0958617	0.987053
Cyp2g1	0.473733	-0.00993975	0.0123007	-0.808063	0.419054	0.987053
Cyp2a1	0.0837976	-0.00133354	0.0087204	-0.152922	0.87846	0.987053
Cyp2f4	6.90649	-0.00909432	0.00935847	-0.971773	0.331163	0.987053
Cyp2t1	35.339	-0.0231034	0.0707084	-0.326741	0.743863	0.987053
Egln2	2534.63	-0.0136038	0.051426	-0.264532	0.79137	0.987053
Rab4b	819.784	0.0417504	0.0548102	0.761726	0.446224	0.987053
Snrpa	1651.02	-0.0910301	0.0577971	-1.57499	0.115258	0.987053
Adck4	727.692	0.0312321	0.06362	0.490916	0.623486	0.987053
Numbl	1887.07	-0.0846528	0.0688308	-1.22987	0.218746	0.987053
Ltbp4	1407.69	-0.117052	0.0782961	-1.49499	0.134917	0.987053
Shkbp1	1065.3	-0.0353134	0.0678094	-0.520774	0.602524	0.987053
Sptbn4	1106.1	-0.029255	0.0825268	-0.354491	0.722971	0.987053
Blvrb	316.108	-0.0705381	0.0786952	-0.896345	0.370068	0.987053
Sertad3	131.796	0.0526234	0.0819263	0.642326	0.520661	0.987053
Sertad1	86.3547	0.059294	0.0820209	0.722913	0.469733	0.987053
Prx	57.2549	-0.0912332	0.0824099	-1.10707	0.268266	0.987053
Hipk4	40.0464	-0.0744517	0.0785136	-0.948265	0.342995	0.987053
Pld3	2833.36	-0.0502859	0.0706172	-0.712091	0.476409	0.987053
RGD1307554	1107.07	-0.0316696	0.0554746	-0.570885	0.568078	0.987053
Ttc9b	1415.33	-0.0289939	0.0683841	-0.423985	0.671577	0.987053
Map3k10	4032.71	-0.0589922	0.0607373	-0.971269	0.331414	0.987053
Psmc4	2990.75	0.0653539	0.0704275	0.927961	0.353428	0.987053
Fcgbp	32.0344	-0.0294496	0.0782609	-0.3763	0.706694	0.987053
Fcgbpl1	4.45605	0.0205499	0.0442984	0.463896	0.642722	0.987053
Fbl	1633.52	0.0381007	0.0667099	0.571141	0.567904	0.987053
Dyrk1b	1072.08	-0.0862037	0.0627634	-1.37347	0.169606	0.987053
Pak4	881.163	-0.0861254	0.0680804	-1.26505	0.205852	0.987053
Nccrp1	0.867116	0.00469423	0.021239	0.221019	0.825077	0.987053
Sycn	0.613609	-0.00397324	0.0161952	-0.245334	0.806198	0.987053
Lrfn1	1463.59	-0.105686	0.0671359	-1.57421	0.115438	0.987053
Gmfg	117.277	0.0412308	0.0825299	0.499586	0.617367	0.987053
Paf1	2034.97	-0.028596	0.0582105	-0.491251	0.623249	0.987053
Med29	869.7	0.0693	0.0816576	0.848666	0.396067	0.987053
Zfp36	88.0028	-0.0386914	0.0818053	-0.47297	0.636235	0.987053
Plekhg2	2063.04	-0.101242	0.0707686	-1.4306	0.152544	0.987053
Rps16	30857.9	0.0464569	0.0814373	0.570462	0.568365	0.987053
Supt5h	4013.87	-0.0729493	0.0582714	-1.25189	0.21061	0.987053
Dll3	538.315	-0.0985501	0.0811773	-1.21401	0.224744	0.987053
Selv	4.80709	-0.0271753	0.045204	-0.60117	0.547727	0.987053
Fbxo27	148.123	-0.0137827	0.0798944	-0.172512	0.863035	0.987053
Fbxo17	37.945	0.0803843	0.0823037	0.976679	0.328728	0.987053
Mrps12	475.286	0.0425456	0.0694326	0.61276	0.540035	0.987053
Sars2	304.896	-0.0286136	0.0593378	-0.482215	0.629653	0.987053
Sirt2	2760.39	-0.0614165	0.0427233	-1.43754	0.150565	0.987053
Rinl	5.42211	-0.0118731	0.0508766	-0.233371	0.815474	0.987053
Hnrnpl	13440.4	0.021512	0.0642351	0.334894	0.737705	0.987053
Lgals4	0.449377	0.00971758	0.0104543	0.929528	0.352616	0.987053
Lgals7	7.64738	-0.0183923	0.0534232	-0.344275	0.730639	0.987053
Capn12	52.4222	-0.0467804	0.0816718	-0.572785	0.56679	0.987053
Actn4	4193.46	-0.095624	0.0694016	-1.37784	0.168254	0.987053
Yif1b	0.243875	0.00223594	0.011181	0.199977	0.841499	0.987053
Spint2	1124.06	0.0976859	0.0654217	1.49317	0.135392	0.987053
Ppp1r14a	95.4581	-0.135284	0.0797956	-1.69538	0.0900028	0.987053
Sipa1l3	965.28	-0.109263	0.0788077	-1.38645	0.16561	0.987053
Zfp84	988.835	-0.0241197	0.0653809	-0.36891	0.712195	0.987053
Zfp74	16.7916	-0.0919309	0.0720654	-1.27566	0.202076	0.987053
Eif3k	1480.62	0.0604916	0.0658007	0.919316	0.35793	0.987053
Rasgrp4	29.7963	-0.0363046	0.078099	-0.464854	0.642036	0.987053
Fam98c	601.269	-0.0232205	0.0640285	-0.362659	0.71686	0.987053
Spred3	256.343	0.0686335	0.0737114	0.931111	0.351796	0.987053
Ggn	48.4155	0.0546749	0.0823823	0.663672	0.5069	0.987053
Psmd8	3099.94	0.0847356	0.0639843	1.32432	0.185397	0.987053
Zfp382	538.901	-0.0262753	0.0620049	-0.423762	0.671739	0.987053
Zfp566	44.3801	-0.050811	0.0813599	-0.624521	0.532285	0.987053
Zfp260	46.3545	0.127798	0.0806071	1.58545	0.112865	0.987053
Capns1	2113.26	0.0818017	0.0646759	1.26479	0.205945	0.987053
Tbcb	56.6528	0.104363	0.0819132	1.27407	0.202639	0.987053
Polr2i	13.5599	0.0312255	0.0645117	0.484029	0.628365	0.987053
Ovol3	0.416199	0.00269647	0.0122154	0.220743	0.825293	0.987053
Wdr62	282.598	-0.128249	0.0824521	-1.55544	0.119842	0.987053
Clip3	130.262	-0.110655	0.0792831	-1.39569	0.162807	0.987053
Alkbh6	7.16725	0.0127707	0.0563855	0.226488	0.820822	0.987053
Syne4	0.901355	-0.0162736	0.0184447	-0.882288	0.377621	0.987053
RGD1562079	26.717	0.0574035	0.0741787	0.773854	0.439017	0.987053
Tyrobp	129.046	0.0763001	0.0799737	0.954064	0.340051	0.987053
Hcst	1.71301	-0.00955395	0.0296216	-0.322533	0.747049	0.987053
Aplp1	14782.6	-0.0554768	0.0732483	-0.757379	0.448823	0.987053
Kirrel2	67.5132	0.133595	0.0813797	1.64163	0.100667	0.987053
Nphs1	6.59138	0.0292099	0.0546338	0.53465	0.592892	0.987053
Prodh2	3.47591	-0.0155982	0.0401156	-0.38883	0.697402	0.987053
Proser3	1098.16	-0.0986922	0.0729107	-1.3536	0.175863	0.987053
Lin37	458.254	0.0724958	0.0727358	0.996699	0.31891	0.987053
Psenen	1105.91	0.0372372	0.0676327	0.550579	0.581922	0.987053
U2af1l4	641.288	0.016457	0.0751064	0.219115	0.82656	0.987053
Igflr1	48.5617	-0.0368488	0.0820317	-0.449203	0.653285	0.987053
Mir3569	0.492838	0.0086723	0.015873	0.546357	0.58482	0.987053
Zbtb32	0.748053	-0.00429468	0.0202561	-0.212019	0.832092	0.987053
Upk1a	7.90154	0.0558491	0.0577583	0.966945	0.333572	0.987053
LOC688869	2106.62	0.0855844	0.0753281	1.13616	0.255891	0.987053
Rbm42	2318.13	-0.0272198	0.049133	-0.554002	0.579577	0.987053
Atp4a	15.6527	-0.0379468	0.0513228	-0.739375	0.45968	0.987053
Tmem147	1259.46	0.0718717	0.0773287	0.929431	0.352666	0.987053
Gapdhs	89.2444	0.0622156	0.0822928	0.756027	0.449633	0.987053
Sbsn	87.0774	0.0170316	0.082452	0.206564	0.83635	0.987053
Dmkn	4.92915	-0.00926422	0.0506648	-0.182853	0.854913	0.987053
Ffar2	1.27889	-0.00845601	0.0244623	-0.345675	0.729587	0.987053
Cd22	9.95388	-0.0645808	0.0641788	-1.00626	0.314289	0.987053
Mag	17.4428	0.0386522	0.0578393	0.668268	0.503962	0.987053
Hamp	1.35041	0.0147784	0.0237589	0.622014	0.533933	0.987053
Usf2	2782.83	-0.0530147	0.052333	-1.01303	0.311047	0.987053
Lsr	365.167	0.0557816	0.0762543	0.731521	0.464461	0.987053
Fxyd5	154.702	0.100943	0.0823449	1.22585	0.220255	0.987053
Fxyd7	193.484	-0.0503232	0.0820577	-0.613266	0.539701	0.987053
Fxyd1	57.377	-0.065964	0.0751949	-0.877241	0.380356	0.987053
Fxyd3	7.13452	-0.0160896	0.0470637	-0.341869	0.732449	0.987053
Hpn	3.03085	-0.0351655	0.0324359	-1.08415	0.278298	0.987053
Scn1b	34.2807	-0.0826295	0.0723518	-1.14205	0.253433	0.987053
Gramd1a	6532.4	-0.100071	0.0693346	-1.44331	0.148934	0.987053
Scgb1b30	0.159759	0.00270322	0.0087204	0.309988	0.75657	0.987053
Pdcd2l	379.809	0.116119	0.0721102	1.61031	0.107331	0.987053
Gpi	4393.61	-0.0626319	0.0615345	-1.01783	0.308757	0.987053
RGD1308428	1219.03	-0.050752	0.0538334	-0.942761	0.345803	0.987053
Lsm14a	2231.21	0.0508921	0.0574394	0.886014	0.37561	0.987053
Kctd15	2544.07	0.0200282	0.0482563	0.415038	0.678114	0.987053
Pepd	884.982	0.024849	0.0668683	0.371611	0.710182	0.987053
Pdcd5	0.425385	-0.00428478	0.0156435	-0.273902	0.78416	0.987053
Cebpg	931.744	0.0743515	0.0619301	1.20057	0.229918	0.987053
Cebpa	73.7298	0.114789	0.0825247	1.39097	0.164235	0.987053
Lrp3	3117.18	-0.0268737	0.0483015	-0.556374	0.577955	0.987053
Gpatch1	429.647	-0.0356294	0.0631673	-0.564049	0.572721	0.987053
Rhpn2	69.4729	-0.0835973	0.0821156	-1.01804	0.308657	0.987053
Faap24	161.271	0.0201503	0.0808698	0.24917	0.803229	0.987053
Cep89	679.395	-0.0391728	0.0579745	-0.67569	0.499237	0.987053
Slc7a9	3.38099	-0.0177402	0.0270074	-0.656863	0.511269	0.987053
Rgs9bp	1.97886	-0.0281139	0.0287273	-0.978648	0.327754	0.987053
Ankrd27	590.248	0.0280828	0.0581442	0.482986	0.629106	0.987053
Dpy19l3	2274.02	-0.0561078	0.0782704	-0.716845	0.47347	0.987053
Tshz3	1191.54	-0.0331775	0.081857	-0.40531	0.68525	0.987053
Uri1	1550.41	0.0553501	0.0737218	0.750797	0.452775	0.987053
Ccne1	380.572	-0.0895044	0.0782249	-1.14419	0.252544	0.987053
Plekhf1	29.1264	-0.0559348	0.0751686	-0.744124	0.456802	0.987053
Pop4	1126.56	0.0856009	0.0783857	1.09205	0.274812	0.987053
LOC365238	1.30931	-0.0266546	0.0255179	-1.04454	0.296234	0.987053
Vstm2b	592.983	-0.0341069	0.0813258	-0.419386	0.674934	0.987053
MGC114499	1.26681	0.023379	0.0189822	1.23163	0.218087	0.987053
Etfb	687.886	0.0249017	0.0731794	0.340283	0.733643	0.987053
Cldnd2	0.239337	-0.00217417	0.0111249	-0.195433	0.845054	0.987053
Nkg7	0.402009	-0.0135149	0.0123661	-1.0929	0.274438	0.987053
Siglec10	0.615918	-0.00522347	0.0164492	-0.317551	0.750825	0.987053
Siglec5	46.4842	0.0910092	0.079849	1.13977	0.254384	0.987053
Vom2r38	0.174006	0.00270322	0.0087204	0.309988	0.75657	0.987053
Vom2r37	0.175008	0.00270322	0.0087204	0.309988	0.75657	0.987053
Zfp819	51.9402	-0.0509101	0.0821583	-0.619659	0.535482	0.987053
Klk13	0.251654	0.0040488	0.0087204	0.464291	0.642439	0.987053
Klk11	0.382617	0.0104078	0.0140111	0.742829	0.457585	0.987053
Klk9	0.23093	-0.00144172	0.00906618	-0.159022	0.873651	0.987053
Klk8	2.1369	0.0237192	0.0303399	0.781781	0.434343	0.987053
Klk4	32.6207	-0.0904633	0.0726606	-1.24501	0.213127	0.987053
Acpt	47.4458	-0.0496315	0.0825435	-0.601276	0.547656	0.987053
Clec11a	100.909	0.0728614	0.0817722	0.891028	0.372914	0.987053
Shank1	9213.44	-0.0513352	0.0791668	-0.648444	0.516698	0.987053
Syt3	590.408	-0.0176263	0.0793976	-0.222001	0.824313	0.987053
Lrrc4b	9221.89	-0.0679853	0.0624164	-1.08922	0.276056	0.987053
Emc10	2242.95	-0.00784824	0.0482568	-0.162635	0.870806	0.987053
Mybpc2	47.5913	-0.122421	0.0824708	-1.48442	0.137698	0.987053
Spib	1.16776	0.0159883	0.0217958	0.733549	0.463224	0.987053
Pold1	858.931	-0.0769618	0.0794397	-0.968807	0.332641	0.987053
Kcnc3	794.328	-0.0632337	0.081633	-0.77461	0.43857	0.987053
Myh14	180.419	-0.0438568	0.0822923	-0.53294	0.594075	0.987053
Nup62	2080.77	-0.101578	0.0594621	-1.70827	0.0875856	0.987053
Tbc1d17	1263.06	-0.0565337	0.0676778	-0.835336	0.403529	0.987053
Akt1s1	1514.07	-0.0544986	0.0488208	-1.1163	0.264295	0.987053
Pnkp	440.722	0.0429035	0.072184	0.594363	0.552269	0.987053
Med25	3028.02	-0.111607	0.0617454	-1.80753	0.070679	0.987053
Fuz	509.259	-0.075132	0.0579212	-1.29714	0.194582	0.987053
Ap2a1	3289.34	-0.0716169	0.0704863	-1.01604	0.309611	0.987053
Tsks	11.8011	-0.0526428	0.0636906	-0.82654	0.408498	0.987053
Cpt1c	995.2	-0.0341271	0.0673746	-0.506527	0.612487	0.987053
Bcl2l12	168.895	-0.13504	0.0818709	-1.64943	0.0990594	0.987053
Irf3	1310.95	-0.043594	0.073123	-0.596173	0.55106	0.987053
Scaf1	6113.44	-0.0951665	0.0672467	-1.41518	0.157015	0.987053
Rras	140.199	0.0883983	0.0792565	1.11535	0.264703	0.987053
Prrg2	18.7411	-0.0696894	0.0725678	-0.960336	0.336886	0.987053
Nosip	737.963	0.0414197	0.0720522	0.574857	0.565388	0.987053
Rcn3	372.161	0.0252546	0.0708936	0.356232	0.721667	0.987053
Mir150	0.0880041	0.00135763	0.0087204	0.155685	0.876282	0.987053
Rps11	20570.3	0.05968	0.0824694	0.723663	0.469273	0.987053
Rpl13a	33614.4	0.0603696	0.0814516	0.741171	0.45859	0.987053
Flt3lg	34.7074	0.0812655	0.0794841	1.02241	0.306586	0.987053
Aldh16a1	451.423	-0.0233436	0.059947	-0.389403	0.696978	0.987053
Pih1d1	497.236	0.011742	0.0636311	0.184533	0.853595	0.987053
Slc17a7	1482.75	-0.04122	0.082544	-0.49937	0.617519	0.987053
Pth2	1.32259	-0.0391572	0.0243841	-1.60585	0.108307	0.987053
Dkkl1	8.87142	-0.0194094	0.0598774	-0.324152	0.745823	0.987053
Tead2	1977.15	-0.0855276	0.0825439	-1.03615	0.300134	0.987053
Cd37	29.4087	-0.0886932	0.0788961	-1.12418	0.260938	0.987053
RGD1562492	1.19994	0.00628966	0.0192249	0.327162	0.743545	0.987053
Trpm4	467.414	-0.0418198	0.0817519	-0.511546	0.608969	0.987053
Hrc	26.6506	-0.0399993	0.0761719	-0.525119	0.599501	0.987053
Ppfia3	2234.05	-0.0152089	0.0783155	-0.1942	0.846019	0.987053
Lin7b	76.1966	0.0883451	0.0806827	1.09497	0.27353	0.987053
Snrnp70	5300.61	-0.0638989	0.0584962	-1.09236	0.274674	0.987053
Kcna7	1.63138	-0.0263712	0.0266637	-0.989028	0.322649	0.987053
Lhb	36.395	-0.0192192	0.0815842	-0.235575	0.813762	0.987053
Ruvbl2	2083.05	0.0422165	0.0573093	0.736643	0.461339	0.987053
Bax	1823.97	0.0627682	0.0691735	0.907403	0.364194	0.987053
Tulp2	6.08704	0.0129418	0.0494704	0.261607	0.793625	0.987053
Nucb1	2112.61	-0.0396317	0.0666005	-0.595066	0.5518	0.987053
Ppp1r15a	395.333	-0.0723185	0.0771351	-0.937556	0.348473	0.987053
Plekha4	66.9549	-0.0871029	0.0821327	-1.06051	0.288911	0.987053
Hsd17b14	1.73369	-0.0436559	0.026975	-1.61838	0.105581	0.987053
Bcat2	378.972	0.026571	0.0781986	0.339789	0.734016	0.987053
Fut1	17.6511	0.035672	0.0676935	0.526963	0.598219	0.987053
Izumo1	16.7214	0.0978714	0.068348	1.43196	0.152156	0.987053
Rasip1	441.915	-0.0352768	0.081861	-0.430936	0.666515	0.987053
Fut2	10.1231	0.036741	0.0625943	0.58697	0.557224	0.987053
Sec1	2.36291	-0.0381677	0.0341662	-1.11712	0.263944	0.987053
Ntn5	6.01288	-0.0331145	0.0404659	-0.818331	0.413168	0.987053
Car11	1901.9	-0.0350746	0.078762	-0.445324	0.656086	0.987053
Sphk2	998.562	-0.0726769	0.0622221	-1.16802	0.242797	0.987053
Rpl18	10940.8	0.0486769	0.0821322	0.592666	0.553405	0.987053
Spaca4	1.7212	0.0137713	0.0286063	0.481409	0.630226	0.987053
Sult2b1	364.61	-0.0556673	0.0819323	-0.67943	0.496866	0.987053
Cyth2	4176.71	0.0101139	0.0447036	0.226245	0.821011	0.987053
Kcnj14	304.912	-0.0620506	0.0737552	-0.841305	0.400177	0.987053
Grwd1	463	-0.0817007	0.0594066	-1.37528	0.169044	0.987053
Grin2d	395.165	-0.0311403	0.0825427	-0.377264	0.705978	0.987053
Syngr4	12.4658	0.0276704	0.0694404	0.398478	0.690278	0.987053
Ccdc114	90.0386	-0.0438245	0.0820074	-0.534397	0.593067	0.987053
Abcc6	54.202	-0.0394461	0.0792195	-0.497934	0.618531	0.987053
Nomo1	1934.32	-0.0442091	0.071577	-0.617644	0.53681	0.987053
Kcnj11	229.301	-0.051869	0.0711895	-0.728604	0.466244	0.987053
Abcc8	176.76	-0.0330616	0.0796858	-0.4149	0.678215	0.987053
Ush1c	1.10752	-0.00788668	0.0201523	-0.391354	0.695536	0.987053
Otog	5.94779	-0.0733919	0.0460986	-1.59206	0.111371	0.987053
Myod1	1.01506	0.0397107	0.0234878	1.69069	0.0908952	0.987053
Kcnc1	427.917	-0.0581823	0.0752932	-0.772743	0.439674	0.987053
Tph1	4.77929	-0.00884007	0.038291	-0.230865	0.817419	0.987053
Hps5	490.114	-0.064984	0.0740977	-0.877004	0.380484	0.987053
Gtf2h1	1309.05	0.101331	0.0593951	1.70605	0.0879987	0.987053
Ldha	4330.76	0.0634001	0.06494	0.976288	0.328922	0.987053
Ldhc	4.46527	-0.0219685	0.0361813	-0.60718	0.543732	0.987053
Tsg101	3991.38	0.0743833	0.050095	1.48485	0.137585	0.987053
Ptpn5	1785.42	-0.0648516	0.0759386	-0.854001	0.393104	0.987053
Mrgprb5	0.0837976	-0.00133354	0.0087204	-0.152922	0.87846	0.987053
Zdhhc13	867.218	0.095044	0.0611923	1.5532	0.120375	0.987053
Csrp3	1.47582	0.0153984	0.0202158	0.761703	0.446237	0.987053
Nav2	1784.64	0.0236396	0.0821144	0.287887	0.773434	0.987053
Dbx1	0.15452	-0.00267913	0.0087204	-0.307226	0.758672	0.987053
Htatip2	47.6423	0.116218	0.0819766	1.41769	0.156281	0.987053
Slc6a5	3.44165	0.0195824	0.0413804	0.473228	0.636051	0.987053
Nell1	294.274	0.034246	0.0820551	0.417354	0.676419	0.987053
Slc17a6	1207.49	0.0184928	0.0664775	0.278181	0.780874	0.987053
Svip	211.485	0.0520852	0.0820653	0.634681	0.525637	0.987053
Gabra5	804.589	0.0873362	0.0813779	1.07322	0.283173	0.987053
Tubgcp5	768.893	0.0639722	0.0726403	0.880671	0.378496	0.987053
Nipa2	853.261	0.104595	0.0692962	1.50939	0.1312	0.987053
Nipa1	523.883	0.090511	0.066192	1.3674	0.171499	0.987053
Herc2	3232.93	-0.0127907	0.0825363	-0.15497	0.876845	0.987053
LOC100365773	44.8713	-0.0148906	0.0788322	-0.188889	0.85018	0.987053
Bex1	1692.3	0.0853906	0.076818	1.1116	0.266312	0.987053
Ube3a	1664.92	0.0349744	0.0680177	0.514195	0.607116	0.987053
Mir344g	0.922543	0.0120069	0.0213954	0.561192	0.574667	0.987053
Ndn	7950.54	0.0535918	0.0760646	0.704556	0.481087	0.987053
Peg12	169.179	-0.117431	0.0810583	-1.44872	0.147416	0.987053
Chrna7	141.153	0.0204532	0.0795415	0.257139	0.797072	0.987053
Hmgn5	2.81655	0.0147879	0.0328351	0.450368	0.652445	0.987053
Klf13	168.68	-0.0284528	0.0793824	-0.358428	0.720023	0.987053
Trpm1	1.65113	0.040068	0.0297517	1.34674	0.178063	0.987053
Mtmr10	292.315	-0.0453934	0.0696833	-0.651424	0.514773	0.987053
Fan1	281.337	0.0313314	0.073345	0.427179	0.669249	0.987053
Mcee	134.705	0.0451355	0.0801457	0.563168	0.573321	0.987053
Apba2	3745.21	-0.0222749	0.0783586	-0.284269	0.776205	0.987053
Ndnl2	471.631	0.0881395	0.0742098	1.18771	0.234949	0.987053
Tjp1	1591.03	-0.0508008	0.0712911	-0.712582	0.476104	0.987053
Snrpa1	1142.78	0.0909204	0.0705662	1.28844	0.197592	0.987053
Chsy1	1461.63	-0.0684403	0.0566504	-1.20812	0.227002	0.987053
Lrrk1	63.9397	-0.0824385	0.0825164	-0.999055	0.317768	0.987053
Aldh1a3	37.8163	-0.0153697	0.0733717	-0.209477	0.834076	0.987053
Asb7	288.21	0.0209587	0.0725523	0.288878	0.772675	0.987053
Cers3	8.0488	-0.0192363	0.0524218	-0.366952	0.713655	0.987053
Ttc23	156.662	-0.0409191	0.0820689	-0.498594	0.618066	0.987053
Igf1r	887.746	-0.0485886	0.0825394	-0.588672	0.556081	0.987053
Nr2f2	2408.35	-0.0176159	0.0765484	-0.230128	0.817992	0.987053
Mctp2	3.51381	0.0126541	0.0402014	0.314767	0.752938	0.987053
Rgma	3397.72	-0.101528	0.0757546	-1.34022	0.180174	0.987053
Chd2	1520.02	-0.071634	0.0769956	-0.930364	0.352182	0.987053
St8sia2	1565.14	-0.0253325	0.0779683	-0.324908	0.745251	0.987053
Sv2b	608.506	-0.0956297	0.0803262	-1.19052	0.233843	0.987053
Akap13	981.354	-0.0450741	0.0825281	-0.546167	0.584951	0.987053
Klhl25	1565.05	-0.0865324	0.0665451	-1.30036	0.193479	0.987053
Mrpl46	669.447	0.104171	0.0771044	1.35104	0.176682	0.987053
Mrps11	986.975	0.0720405	0.0799857	0.900667	0.367765	0.987053
Det1	279.785	-0.045548	0.0696645	-0.65382	0.513228	0.987053
Mir7a-2	1.88779	-0.0144518	0.0309669	-0.466686	0.640724	0.987053
Aen	559.487	0.0204432	0.0652549	0.313282	0.754067	0.987053
Isg20	32.0424	-0.014918	0.0790277	-0.188769	0.850274	0.987053
Acan	24.0921	-0.0428733	0.0713394	-0.600975	0.547856	0.987053
Hapln3	23.2106	0.0988847	0.0716477	1.38015	0.16754	0.987053
Mfge8	3707.61	-0.0807105	0.0702867	-1.1483	0.250843	0.987053
Abhd2	1027.04	-0.0672494	0.0808933	-0.831335	0.405785	0.987053
Rlbp1	683.887	0.0261625	0.0667392	0.392011	0.69505	0.987053
Polg	815.51	-0.0188329	0.060532	-0.311123	0.755707	0.987053
Mir3597-3	2.03461	0.0239984	0.0253798	0.945572	0.344367	0.987053
Rhcg	13.1366	-0.030002	0.0599427	-0.500511	0.616715	0.987053
Plin1	0.182246	0.00270322	0.0087204	0.309988	0.75657	0.987053
Pex11a	304.05	0.0342551	0.0696514	0.491808	0.622855	0.987053
Mesp1	4.06622	0.0195785	0.0452996	0.4322	0.665596	0.987053
Mesp2	48.5551	0.121469	0.0825438	1.47157	0.141136	0.987053
Anpep	131.598	0.0594337	0.0727989	0.816409	0.414266	0.987053
Ap3s2	1139.79	0.0943233	0.0674533	1.39835	0.162008	0.987053
Arpin	89.2692	0.0955616	0.0816964	1.16972	0.242115	0.987053
Zfp710	717.025	-0.0488053	0.0626145	-0.779456	0.435711	0.987053
Idh2	2448.54	-0.0506261	0.068882	-0.734969	0.462358	0.987053
Sema4b	876.017	-0.0313808	0.0607208	-0.516804	0.605293	0.987053
Cib1	214.212	0.0460635	0.0762416	0.604178	0.545725	0.987053
Ttll13	98.0355	-0.0137885	0.0822961	-0.167548	0.866939	0.987053
Ngrn	1886.51	0.116691	0.0802403	1.45427	0.145872	0.987053
Vps33b	675.25	0.060553	0.0604018	1.0025	0.3161	0.987053
Prc1	2061.01	-0.0375309	0.0814218	-0.460944	0.644839	0.987053
Unc45a	1565.93	-0.0364801	0.0528533	-0.690213	0.49006	0.987053
Hddc3	608.034	0.0635756	0.0778872	0.816252	0.414356	0.987053
Man2a2	1478.04	-0.0959222	0.0652012	-1.47117	0.141245	0.987053
Furin	1543.01	-0.0598739	0.0657461	-0.910683	0.362462	0.987053
Iqgap1	973.894	-0.0484659	0.0672397	-0.720793	0.471037	0.987053
Wdr73	872.079	0.0653391	0.0664109	0.983862	0.325183	0.987053
Nmb	12.4445	-0.0309754	0.0594021	-0.521454	0.602051	0.987053
Sec11a	1406.5	0.0976757	0.0779093	1.25371	0.209947	0.987053
Zfp592	1176.39	-0.0398292	0.0669052	-0.595308	0.551638	0.987053
Alpk3	21.9317	0.0175449	0.0720469	0.24352	0.807602	0.987053
Slc28a1	0.569093	-0.003318	0.0164099	-0.202195	0.839764	0.987053
Rps17	17648.4	0.0317864	0.0747081	0.425474	0.670491	0.987053
Cpeb1	15.238	-0.0507918	0.0627896	-0.808921	0.41856	0.987053
LOC100360933	0.423811	0.00356869	0.0141667	0.251907	0.801113	0.987053
Scarna15	4.66031	-0.054163	0.0445765	-1.21506	0.224345	0.987053
Fsd2	7.68064	0.0355452	0.0537353	0.661487	0.5083	0.987053
Fam103a1	1199.2	0.0734699	0.0820852	0.895044	0.370763	0.987053
RGD1305713	515.564	0.0851099	0.0792695	1.07368	0.282967	0.987053
Btbd1	4082.92	0.0666473	0.038924	1.71224	0.086852	0.987053
Tm6sf1	679.643	0.0524322	0.0576944	0.908792	0.36346	0.987053
Hdgfrp3	2975.13	0.0759151	0.0493213	1.5392	0.123757	0.987053
Sh3gl3	700.423	0.050536	0.0686377	0.736271	0.461566	0.987053
Adamtsl3	62.4946	-0.0659827	0.0821784	-0.80292	0.422021	0.987053
Saxo2	27.9547	-0.0998045	0.0747352	-1.33544	0.181732	0.987053
Eftud1	955.188	-0.0174363	0.0815718	-0.213755	0.830738	0.987053
Mex3b	4856.53	-0.043431	0.0631316	-0.687944	0.491488	0.987053
Tmc3	10.7566	-0.0370638	0.0546532	-0.678164	0.497668	0.987053
Stard5	94.8183	0.0195882	0.0824911	0.237458	0.812301	0.987053
Il23a	35.2814	-0.11012	0.0779409	-1.41286	0.157696	0.987053
RGD1310371	37.1616	-0.0864798	0.0779617	-1.10926	0.267318	0.987053
Mesdc1	1014.87	-0.0093828	0.0534242	-0.175628	0.860586	0.987053
Mesdc2	1353.53	0.0286952	0.0641081	0.447607	0.654437	0.987053
Arnt2	6213.06	-0.0762506	0.0755411	-1.00939	0.312787	0.987053
Fah	61.9632	-0.0987648	0.0823773	-1.19893	0.230554	0.987053
Zfand6	1992.01	0.0820255	0.0785789	1.04386	0.296549	0.987053
LOC652956	1119.26	-0.0432705	0.0686562	-0.630249	0.528532	0.987053
Olr34	0.486185	-0.0087627	0.0158787	-0.551853	0.581049	0.987053
Folh1	15.6851	0.0455477	0.0667948	0.681906	0.495299	0.987053
Tyr	1.68281	0.0426153	0.0309535	1.37675	0.168589	0.987053
Grm5	640.658	0.0892156	0.0820245	1.08767	0.276741	0.987053
Ctsc	103.946	-0.0781914	0.0825341	-0.947382	0.343444	0.987053
Rab38	20.2268	0.0877432	0.0702631	1.24878	0.211745	0.987053
Tmem135	736.639	0.0648799	0.0514912	1.26002	0.207662	0.987053
Fzd4	146.575	-0.036999	0.0812372	-0.455444	0.64879	0.987053
Ccdc81	6.70517	-0.0462461	0.0514208	-0.899365	0.368458	0.987053
Ccdc89	0.995281	-0.0145261	0.0207441	-0.700254	0.483769	0.987053
Dlg2	1127.82	0.120396	0.082271	1.46341	0.143355	0.987053
Tmem126b	529.35	0.0865276	0.0824325	1.04968	0.293866	0.987053
Tmem126a	484.237	0.0433326	0.0824975	0.525259	0.599403	0.987053
Crebzf	2288.82	0.0158256	0.0712732	0.222042	0.824282	0.987053
Ccdc90b	1394.39	0.099772	0.0823908	1.21096	0.22591	0.987053
Ankrd42	340.846	-0.0251277	0.0759183	-0.330984	0.740657	0.987053
Rab30	472.402	0.0968986	0.0642521	1.5081	0.131529	0.987053
Ddias	150.698	0.0553538	0.0815865	0.678467	0.497475	0.987053
Prcp	421.442	0.111396	0.0718689	1.54999	0.121145	0.987053
Fam181b	460.69	0.0114489	0.0739289	0.154864	0.876929	0.987053
Tenm4	2750.44	0.0390496	0.0818295	0.477207	0.633215	0.987053
Gab2	731.474	0.0565007	0.0741063	0.762427	0.445805	0.987053
Kctd21	105.263	-0.0334477	0.0784766	-0.426212	0.669953	0.987053
Alg8	281.394	-0.0961165	0.0712147	-1.34967	0.177121	0.987053
Ndufc2	2459.97	0.0890826	0.081506	1.09296	0.274412	0.987053
Thrsp	24.2898	0.0316756	0.0718182	0.441053	0.659175	0.987053
Ints4	1230.7	-0.075637	0.0728753	-1.0379	0.299318	0.987053
Aamdc	74.4953	0.0975436	0.0820664	1.18859	0.234599	0.987053
Clns1a	3149.66	0.119475	0.0821209	1.45486	0.145707	0.987053
Aqp11	114.583	-0.043306	0.082111	-0.527408	0.59791	0.987053
Pak1	4427.64	0.0158699	0.0512305	0.309776	0.756732	0.987053
Myo7a	29.7317	-0.0809927	0.0756167	-1.07109	0.284127	0.987053
Capn5	451.554	0.0244237	0.0794354	0.307466	0.758489	0.987053
Omp	2.32278	-0.0431988	0.0274153	-1.57572	0.115091	0.987053
Tsku	628.494	-0.0339537	0.0664321	-0.511104	0.609278	0.987053
Gucy2d	0.767804	0.00549888	0.0202578	0.271444	0.786049	0.987053
Lrrc32	99.2176	-0.0131898	0.0816575	-0.161526	0.871679	0.987053
Wnt11	16.4564	0.0163992	0.0665909	0.246268	0.805475	0.987053
RGD1561870	0.261823	-0.00228151	0.0113949	-0.200222	0.841307	0.987053
Uvrag	279.872	0.0346238	0.0741036	0.467234	0.640332	0.987053
Dgat2	286.022	-0.0688697	0.0640194	-1.07576	0.282033	0.987053
Mogat2	395.162	0.068953	0.0803975	0.857651	0.391085	0.987053
Map6	2138.37	-0.0335583	0.0804729	-0.417014	0.676668	0.987053
Serpinh1	3073.18	-0.0314286	0.0706103	-0.4451	0.656248	0.987053
Rps3	20705.7	0.0716278	0.0821727	0.871675	0.383386	0.987053
Arrb1	658.677	-0.0132634	0.082237	-0.161282	0.871871	0.987053
Olr35	2.29184	0.0348982	0.0261228	1.33593	0.181573	0.987053
Neu3	34.0928	-0.0139321	0.0791419	-0.17604	0.860262	0.987053
Spcs2	2930.95	0.0765649	0.0575525	1.33035	0.183404	0.987053
Chrdl2	3.79754	-0.0121522	0.0370136	-0.328316	0.742672	0.987053
Pold3	580.019	-0.0436975	0.0621087	-0.703564	0.481704	0.987053
Lipt2	235.322	0.0748148	0.0825327	0.906488	0.364678	0.987053
LOC100912071	178.503	-0.0303561	0.0823425	-0.368656	0.712384	0.987053
Kcne3	34.3174	0.0823997	0.0808534	1.01912	0.308144	0.987053
P4ha3	203.65	0.0146576	0.081865	0.179046	0.857901	0.987053
Ppme1	2866.61	-0.0384364	0.0635497	-0.604824	0.545296	0.987053
C2cd3	1510.72	-0.0492635	0.0779568	-0.631933	0.527431	0.987053
Ucp3	0.429497	-0.00267534	0.0123964	-0.215815	0.829132	0.987053
Ucp2	1081.61	-0.0111033	0.0661767	-0.167783	0.866754	0.987053
Dnajb13	19.6614	-0.0618881	0.0691025	-0.895599	0.370467	0.987053
Coa4	281.298	0.0759783	0.0800602	0.949016	0.342613	0.987053
Mrpl48	1672.41	0.101043	0.0823607	1.22683	0.219886	0.987053
Plekhb1	166.593	0.0350872	0.0751868	0.466667	0.640738	0.987053
Fam168a	4708.61	-0.0112626	0.0685449	-0.16431	0.869487	0.987053
Relt	103.409	-0.0332231	0.0790905	-0.420065	0.674438	0.987053
Mir3102	33.9794	-0.108745	0.0812518	-1.33837	0.180775	0.987053
P2ry6	15.6417	-0.0766634	0.0682908	-1.1226	0.261606	0.987053
Rpl7a	229.305	-0.0615807	0.0819477	-0.751463	0.452374	0.987053
Atg16l2	51.4682	-0.0294892	0.0808555	-0.364714	0.715325	0.987053
Pde2a	2069.15	-0.112527	0.0738504	-1.52371	0.12758	0.987053
Clpb	814.463	-0.0536054	0.0671528	-0.79826	0.42472	0.987053
Phox2a	0.682909	-0.0114993	0.0175971	-0.653474	0.51345	0.987053
Inppl1	1214.94	-0.0932518	0.0758169	-1.22996	0.218712	0.987053
Folr1	141.112	0.0453476	0.0801328	0.565905	0.571458	0.987053
Lrtomt	73.3302	-0.050564	0.0813955	-0.621214	0.534459	0.987053
Lamtor1	1061.66	0.056226	0.0642998	0.874436	0.381881	0.987053
Lrrc51	25.4886	-0.0241769	0.0759144	-0.318475	0.750124	0.987053
Numa1	6513.99	-0.0518575	0.0731315	-0.709098	0.478263	0.987053
Il7	0.826358	-0.0295615	0.0214811	-1.37616	0.168771	0.987053
Rnf121	549.174	0.0290343	0.072978	0.39785	0.690741	0.987053
Art5	0.599889	0.0127393	0.0166613	0.764606	0.444506	0.987053
Chrna10	1.34734	-0.0188548	0.0249501	-0.755699	0.44983	0.987053
Nup98	1879.22	-0.0551939	0.0776167	-0.711108	0.477017	0.987053
Pgap2	434.021	-0.0229224	0.0613351	-0.373724	0.708609	0.987053
Rhog	376.694	-0.107805	0.0611856	-1.76194	0.0780798	0.987053
Stim1	722.624	-0.0699876	0.0654806	-1.06883	0.285146	0.987053
Rrm1	3690.95	-0.0257233	0.0817222	-0.314765	0.75294	0.987053
Olr41	0.0740234	-0.00133354	0.0087204	-0.152922	0.87846	0.987053
Trim21	16.241	0.0518891	0.073107	0.709769	0.477848	0.987053
Olr43	0.47802	-0.00978724	0.0105326	-0.929233	0.352769	0.987053
Olr46	0.180407	-0.00267913	0.0087204	-0.307226	0.758672	0.987053
Olr47	0.0740234	-0.00133354	0.0087204	-0.152922	0.87846	0.987053
Olr48	0.22207	-0.00402472	0.0087204	-0.461529	0.644419	0.987053
Olr63	0.31336	-0.00649928	0.0135551	-0.479473	0.631603	0.987053
Olr59	0.248029	0.00225634	0.0112317	0.200891	0.840784	0.987053
Olr49	0.0902034	-0.00133354	0.0087204	-0.152922	0.87846	0.987053
Olr69	0.180407	-0.00267913	0.0087204	-0.307226	0.758672	0.987053
Olr78	0.0902034	-0.00133354	0.0087204	-0.152922	0.87846	0.987053
Olr83	0.0740234	-0.00133354	0.0087204	-0.152922	0.87846	0.987053
Olr86	0.0902034	-0.00133354	0.0087204	-0.152922	0.87846	0.987053
Olr89	0.23825	-0.00444745	0.00916559	-0.485234	0.627511	0.987053
Olr92	0.0902034	-0.00133354	0.0087204	-0.152922	0.87846	0.987053
Olr107	0.0740234	-0.00133354	0.0087204	-0.152922	0.87846	0.987053
Olr113	0.0902034	-0.00133354	0.0087204	-0.152922	0.87846	0.987053
Hbb-b1	9919.89	-0.0187625	0.0610988	-0.307084	0.758779	0.987053
LOC100134871	20564.9	-0.0103588	0.059917	-0.172886	0.862741	0.987053
LOC689064	10578	-0.0327518	0.0599505	-0.546314	0.58485	0.987053
Hbe2	1.12665	-0.0269256	0.0239021	-1.1265	0.259955	0.987053
LOC499219	0.0804969	-0.00133354	0.0087204	-0.152922	0.87846	0.987053
Olr140	0.0740234	-0.00133354	0.0087204	-0.152922	0.87846	0.987053
Olr144	0.0740234	-0.00133354	0.0087204	-0.152922	0.87846	0.987053
RGD1310717	2.79827	-0.00916948	0.00927756	-0.988351	0.322981	0.987053
Olr150	0.0740234	-0.00133354	0.0087204	-0.152922	0.87846	0.987053
Trim6	1.87446	-0.0212966	0.030209	-0.704977	0.480825	0.987053
Trim34	35.7523	0.0740828	0.0760257	0.974445	0.329836	0.987053
Trim5	90.4787	-0.0645589	0.0824664	-0.782851	0.433715	0.987053
Olr152	0.148047	-0.00267913	0.0087204	-0.307226	0.758672	0.987053
Olr154	0.0828832	0.00135763	0.0087204	0.155685	0.876282	0.987053
Olr155	0.221157	0.0042893	0.0089749	0.477921	0.632706	0.987053
Olr156	0.0686363	0.00135763	0.0087204	0.155685	0.876282	0.987053
Olr157	0.148047	-0.00267913	0.0087204	-0.307226	0.758672	0.987053
Olr164	0.0804969	-0.00133354	0.0087204	-0.152922	0.87846	0.987053
Olr183	0.0740234	-0.00133354	0.0087204	-0.152922	0.87846	0.987053
Olr186	0.0740234	-0.00133354	0.0087204	-0.152922	0.87846	0.987053
Olr198	0.0902034	-0.00133354	0.0087204	-0.152922	0.87846	0.987053
Olr200	0.0902034	-0.00133354	0.0087204	-0.152922	0.87846	0.987053
Olr201	0.22207	-0.00402472	0.0087204	-0.461529	0.644419	0.987053
Olr202	0.63104	-0.00722055	0.0145816	-0.495181	0.620473	0.987053
Fam160a2	877.156	-0.0681666	0.0592167	-1.15114	0.249675	0.987053
Cnga4	1.412	-0.0342903	0.0275561	-1.24438	0.213358	0.987053
Cckbr	23.7421	-0.0269696	0.0637719	-0.422907	0.672363	0.987053
Prkcdbp	428.442	0.0116757	0.0699984	0.1668	0.867528	0.987053
Smpd1	1410.17	-0.0549065	0.0559408	-0.981511	0.326341	0.987053
Apbb1	5122.48	0.010307	0.0632815	0.162875	0.870617	0.987053
Hpx	32.3297	0.0702924	0.080216	0.876289	0.380873	0.987053
Arfip2	1614.79	0.0326237	0.0638724	0.510764	0.609517	0.987053
Timm10b	527.799	0.0926092	0.0823914	1.12402	0.261006	0.987053
Ilk	3349.72	0.0795947	0.0595351	1.33694	0.181244	0.987053
Taf10	1506.13	0.0319247	0.0805144	0.396509	0.69173	0.987053
Tpp1	496.249	-0.0618395	0.0749228	-0.825377	0.409158	0.987053
Dchs1	7595.93	-0.0322343	0.0807745	-0.399065	0.689845	0.987053
Mrpl17	2107.25	0.071566	0.0780434	0.917003	0.359141	0.987053
Olr231	0.296094	-0.0053703	0.0087204	-0.615832	0.538005	0.987053
Olr234	0.0740234	-0.00133354	0.0087204	-0.152922	0.87846	0.987053
Syt9	101.58	-0.031164	0.0821966	-0.379139	0.704584	0.987053
Olfml1	96.0225	0.0606626	0.0817845	0.741737	0.458246	0.987053
Ppfibp2	47.3174	-0.064644	0.0801605	-0.806433	0.419993	0.987053
Cyb5r2	33.5157	-0.0431595	0.0752578	-0.573489	0.566314	0.987053
Olr263	0.0740234	-0.00133354	0.0087204	-0.152922	0.87846	0.987053
Eif3f	8414.82	0.0291036	0.0656367	0.443403	0.657474	0.987053
Tub	978.608	0.0231049	0.0697162	0.331414	0.740332	0.987053
Ric3	536.898	-0.0373998	0.0751924	-0.497388	0.618916	0.987053
Trim66	16.5938	-0.0801677	0.0536788	-1.49347	0.135314	0.987053
Rpl27a	23839.8	0.0477215	0.0818662	0.582921	0.559947	0.987053
LOC499240	6.32443	0.0565239	0.0470018	1.20259	0.229135	0.987053
Ascl3	3.44331	0.0607522	0.0412975	1.47109	0.141268	0.987053
Tmem9b	661.435	0.0422105	0.0665704	0.634073	0.526033	0.987053
Dennd5a	5676.1	-0.101993	0.0576772	-1.76834	0.0770041	0.987053
Tmem41b	951.945	0.070591	0.0678375	1.04059	0.298066	0.987053
Zfp143	578.978	-0.0627736	0.0738072	-0.850508	0.395043	0.987053
Wee1	685.173	-0.121676	0.0806415	-1.50886	0.131336	0.987053
Swap70	247.889	-0.0540069	0.0782675	-0.690029	0.490176	0.987053
Sbf2	4533.84	-0.036348	0.0612236	-0.593692	0.552718	0.987053
Adm	25.2664	0.05157	0.0769197	0.670439	0.502578	0.987053
Ampd3	84.2072	0.0864615	0.0825317	1.04762	0.294816	0.987053
rnf141	947.906	0.0493465	0.0570115	0.865553	0.386735	0.987053
Lyve1	263.668	0.121626	0.082542	1.47351	0.140614	0.987053
Mrvi1	37.9846	-0.0268439	0.0754394	-0.355833	0.721965	0.987053
Eif4g2	40127.4	0.0290695	0.0592799	0.490377	0.623867	0.987053
Galnt18	274.188	-0.0125714	0.0820942	-0.153134	0.878293	0.987053
Usp47	4984.96	-0.0551525	0.0693883	-0.794839	0.426707	0.987053
Dkk3	1009.71	0.0561734	0.0557713	1.00721	0.313834	0.987053
Mical2	233.838	-0.0426599	0.0794875	-0.536687	0.591484	0.987053
Parva	443.884	-0.118539	0.0796268	-1.48868	0.136573	0.987053
Tead1	318.744	-0.0583673	0.0825249	-0.707269	0.479399	0.987053
Arntl	532.915	0.0200879	0.063009	0.31881	0.74987	0.987053
Spon1	513.2	-0.0593544	0.0825174	-0.719295	0.471959	0.987053
Rras2	827.343	0.0890354	0.0698437	1.27478	0.202387	0.987053
Copb1	2836.8	0.0743739	0.0687086	1.08245	0.279051	0.987053
Psma1	3112.76	0.0116565	0.0634021	0.183851	0.85413	0.987053
Pde3b	565.37	0.0121452	0.0683265	0.177753	0.858917	0.987053
Cyp2r1	12.0445	0.0453226	0.0645984	0.701605	0.482925	0.987053
Calca	14.9517	0.100746	0.0652767	1.54337	0.122741	0.987053
Nucb2	463.264	0.0148013	0.0821575	0.180158	0.857029	0.987053
Rps13	10248.2	0.0754072	0.0824808	0.914239	0.360591	0.987053
Plekha7	67.7663	-0.0535419	0.0795277	-0.673248	0.500789	0.987053
RGD1311703	4129.53	0.10628	0.0766606	1.38637	0.165633	0.987053
Sox6	436.504	-0.075315	0.079658	-0.945479	0.344414	0.987053
Rps15a	17185.4	0.0193626	0.0748414	0.258715	0.795855	0.987053
Arl6ip1	4091.83	0.0305239	0.0542332	0.562827	0.573553	0.987053
Syt17	145.827	0.0584492	0.0795989	0.734296	0.462768	0.987053
Itpripl2	27.1104	0.0264721	0.0801916	0.33011	0.741317	0.987053
Coq7	426.938	0.0440259	0.0730745	0.602479	0.546855	0.987053
Tmc7	101.729	-0.0903608	0.0805217	-1.12219	0.261781	0.987053
Tmc5	22.6175	-0.112467	0.0747127	-1.50532	0.132242	0.987053
Knop1	35.2698	0.0269073	0.0777985	0.345859	0.729449	0.987053
Gde1	1271.08	-0.0129928	0.062087	-0.209268	0.834239	0.987053
Ccp110	2011.32	-0.0115647	0.0670419	-0.172499	0.863045	0.987053
LOC361635	1268.39	-0.0219079	0.0611261	-0.358405	0.72004	0.987053
Gpr139	43.3324	-0.0227	0.0809327	-0.28048	0.779109	0.987053
Gp2	0.279611	-0.00476035	0.00948149	-0.502067	0.61562	0.987053
Ilkap	1776.4	0.0905598	0.068392	1.32413	0.18546	0.987053
Acsm5	11.9281	0.0523825	0.0658991	0.79489	0.426678	0.987053
Acsm2a	0.338657	0.0100586	0.0118934	0.845729	0.397704	0.987053
RGD1559600	0.0804969	-0.00133354	0.0087204	-0.152922	0.87846	0.987053
Acsm1	1.65284	0.00495591	0.0268337	0.18469	0.853472	0.987053
Acsm4	15.9301	-0.068707	0.0418044	-1.64353	0.100273	0.987053
Thumpd1	2076.59	0.0151473	0.0452036	0.33509	0.737557	0.987053
Eri2	480.537	0.0505646	0.0749996	0.674198	0.500185	0.987053
Exnef	254.371	-0.110074	0.0802199	-1.37215	0.170016	0.987053
Dcun1d3	199.775	0.0296148	0.0762051	0.388619	0.697558	0.987053
Lyrm1	562.953	0.0587986	0.0821144	0.716058	0.473956	0.987053
Tmem159	68.4045	0.134356	0.081229	1.65404	0.0981198	0.987053
Zp2	2.04397	0.0282732	0.031605	0.894579	0.371012	0.987053
Anks4b	7.36158	-0.0148389	0.0526929	-0.28161	0.778243	0.987053
Uqcrc2	3765.94	0.0796194	0.0490243	1.62408	0.104358	0.987053
Pdzd9	35.3254	0.0164847	0.0804798	0.204831	0.837705	0.987053
[truncated: 15,316 more rows]
